# Supplementary material for: Extending resolution of structured illumination microscopy with sparse deconvolution
Source: Research Square preprint supplement (doi:10.21203/rs.3.rs-279271/v1), 2021-03-02
Supplement: Supplementary file 1 [file b32d96184c422ad34f78548c.pdf]

**Extending resolution of structured illumination microscopy with sparse deconvolution**

Weisong Zhao<sup>1,14</sup>, Shiqun Zhao<sup>2,14</sup>, Liuju Li<sup>2,14</sup>, Xiaoshuai Huang<sup>5</sup>, Shijia Xing<sup>2</sup>, Yulin Zhang<sup>2</sup>, Guohua Qiu<sup>1</sup>, Zhenqian Han<sup>1</sup>, Yingxu Shang<sup>9</sup>, De-en Sun<sup>10</sup>, Chunyan Shan<sup>13</sup>, Runlong Wu<sup>2</sup>, Shuwen Zhang<sup>11</sup>, Riwang Chen<sup>7</sup>, Jian Xiao<sup>12</sup>, Yanquan Mo<sup>2</sup>, Jianyong Wang<sup>6</sup>, Wei Ji<sup>11</sup>, Xing Chen<sup>10</sup>, Baoquan Ding<sup>9</sup>, Yanmei Liu<sup>2,8</sup>, Heng Mao<sup>4</sup>, Baoliang Song<sup>12</sup>, Jiubin Tan<sup>1</sup>, Jian Liu<sup>1</sup>, Haoyu Li<sup>1</sup>✉, Liangyi Chen<sup>2,3,6</sup>✉

<sup>1</sup>School of Instrumentation Science and Engineering, Harbin Institute of Technology, Harbin 150080, China.

<sup>2</sup>State Key Laboratory of Membrane Biology, Beijing Key Laboratory of Cardiometabolic Molecular Medicine, Institute of Molecular Medicine, Peking University, Beijing 100871, China.

<sup>3</sup>PKU-IDG/McGovern Institute for Brain Research, Beijing 100871, China.

<sup>4</sup>School of Mathematical Sciences, Peking University, Beijing 100871, China.

<sup>5</sup>Biomedical Engineering Department, Peking University, Beijing 100191, China.

<sup>6</sup>Shenzhen Bay Laboratory, Shenzhen 518055, China.

<sup>7</sup>School of Software and Microelectronics, Peking University, Beijing 100871, China.

<sup>8</sup>Institute for Brain Research and Rehabilitation (IBRR), Guangdong Key Laboratory of Mental Health and Cognitive Science, South China Normal University, Guangzhou, China.

<sup>9</sup>CAS Key Laboratory of Nanosystem and Hierarchical Fabrication, CAS Center for Excellence in Nanoscience, National Center for Nanoscience and Technology, Beijing, China.

<sup>10</sup>College of Chemistry and Molecular Engineering, Peking University, Beijing, China.

<sup>11</sup>National Laboratory of Biomacromolecules, CAS Center for Excellence in Biomacromolecules, Institute of Biophysics, Chinese Academy of Sciences, Beijing, China.

<sup>12</sup>Hubei Key Laboratory of Cell Homeostasis, College of Life Sciences, Wuhan University, Wuhan, China.

<sup>13</sup>College of Life Sciences, Peking University, 100871, Beijing, China.

<sup>14</sup>These authors contributed equally: Weisong Zhao, Shiqun Zhao, Liuju Li.

✉e-mail: [lychen@pku.edu.cn](mailto:lychen@pku.edu.cn); [lihaoyu@hit.edu.cn](mailto:lihaoyu@hit.edu.cn)

28  
29  
30  
31  
32  
33  
34  
35  
36  
37  
38  
39  
40  
41  
42  
43  
44  
45  
46  
47  
48  
49  
50  
51  
52  
53  
54  
55  
56  
57  
58  
59  
60

**Content**

**Supplementary Notes .....3**

Supplementary Note 1 | Image formation and the resolution limit to the Wiener deconvolution..... 3

Supplementary Note 2 | Computational superresolution. .... 4

Supplementary Note 3 | The development of the sparse deconvolution model. .... 8

Supplementary Note 4 | The details of algorithm execution..... 14

Supplementary Note 4.1 | Iterative approximation based on the weighted constraints. .... 14

Supplementary Note 4.2 | Iterative deconvolution. .... 16

Supplementary Note 4.3 | Background estimation. .... 17

Supplementary Note 4.4 | Upsampling operation. .... 18

Supplementary Note 5 | Using the sparse and continuity prior knowledge improves resolution and contrast. .... 20

Supplementary Note 6 | Parameters in the sparse deconvolution software. .... 26

Supplementary Note 7 | Optimal values of the sparsity and the fidelity under different conditions. .... 29

Supplementary Note 8 | Parameters finetuning ..... 33

Supplementary Note 8.1 | Procedures for parameters finetuning. .... 33

Supplementary Note 8.2 | Step-by-step examples. .... 33

Supplementary Note 8.3 | More explanations on the background estimation..... 36

Supplementary Note 9 | The calibration of nuclear pore diameters and the FWHM resolution of Sparse SD-SIM. .... 44

Supplementary Note 9.1 | Calibrating fitted diameters of ring-shaped pores. .... 44

Supplementary Note 9.2 | The bead correction factor. .... 44

Supplementary Note 10 | Other sparsity-based reconstructions that improve spatial resolution in theory..... 48

Supplementary Note 10.1 | FISTA method. .... 48

Supplementary Note 10.2 | NLHT method. .... 50

**Additional Supplementary Figures .....52**

**Supplementary Tables .....55**

Supplementary Table 1 | SSIM of different reconstructions from images corrupted with varying levels of noise. .... 55

Supplementary Table 2 | PSNR of different reconstructions from images corrupted with varying levels of noise..... 55

Supplementary Table 3 | Imaging conditions..... 56

Supplementary Table 4 | Non-zero ratios and background selections of different images. .... 57

Supplementary Table 5 | Computing time of Sparse deconvolution..... 59

**Captions for Supplementary Videos. ....60**

**References .....78**

## Supplementary Notes

### Supplementary Note 1 | Image formation and the resolution limit to the Wiener deconvolution.

The image formation of an aberration-free optical system is governed by simple propagation models of electromagnetic waves interacting with geometrically ideal surfaces of lenses and mirrors. Under such conditions, the process can be described as a two-dimensional Fourier transformation<sup>1</sup>,

$$G(u, v) = H(u, v) \times F(u, v), \quad (1)$$

in which  $G$  is the two-dimensional Fourier transform of the recorded *image*,  $F$  is the transform of the intensity distribution of the *object* that gave rise to the image, and  $H$  is the spatial frequency transfer function of the *optical system*, the OTF. Because the total amount of light energy entering an optical system is limited by a physically limiting pupil or aperture, the OTF is controlled by the aperture function under aberration-free conditions. Therefore, the OTF  $H(u, v)$  can be calculated from the aperture function  $a(x, y)$  by

$$H(u, v) = \int_{-\infty}^{\infty} \int_{-\infty}^{\infty} a(x, y) a(x + u, y + v) dx dy. \quad (2)$$

Therefore, the OTF is the autocorrelation of the aperture function, and  $x$  and  $y$  denote coordinates in the spatial domain, while  $u$  and  $v$  represent coordinates in the spatial frequency domain. The transmission of electromagnetic waves within the aperture is perfect, with  $a(x, y) = 1$ , while outside of the aperture, no wave can propagate and  $a(x, y) = 0$ . Therefore, the OTF changes to zero outside of a boundary defined by the autocorrelation of the aperture function. Because no spatial frequency information from the object outside of the OTF support can be transmitted to the recording device, the optical system itself is always bandwidth limited<sup>1</sup>.

To recover the information of the original *object* from the recorded *image*, **Eq. (1)** can be rearranged into the following form:

$$F(u, v) = \frac{G(u, v)}{H(u, v)}. \quad (3)$$

In the preceding equation, it is obvious that the retrieved object spatial frequency exists only where  $H(u, v) \neq 0$ , and **division by null outside of the region of OTF support is impossible**. This is why diffraction limits the image resolution and causes the general belief that the information lost due to the cut-off of system OTF cannot be retrieved by mathematical inversion in the frequency domain.

## Supplementary Note 2 | Computational superresolution.

Richardson and Lucy<sup>2, 3</sup> (RL) deconvolution, followed later by Shepp and Vardi<sup>4</sup> regarded the problem of recovering the underlying image blurred by a known PSF as one of statistical estimation rather than an exercise in direct solution. They proposed an iterative deconvolution method based on the Bayes' theorem on conditional probabilities, and the following equation gives the basic algorithmic computation:

$$f^{n+1}(x, y) = f^n(x, y) \left[ \left( \frac{g(x, y)}{h(x, y) \otimes f^n(x, y)} \right) \odot h(x, y) \right]. \quad (4)$$

For image data  $g(x, y)$  and the PSF  $h(x, y)$ , the object at iteration  $n+1$  is calculated from its estimation at  $n$ . The starting approximation  $f^0(x, y)$  should be a smooth, nonnegative function having the same integrated intensity as the observed image, thus adding a nonnegative a priori knowledge to the approximation. From this equation, it is obvious that a large deviation of  $\frac{g(x, y)}{h(x, y) \otimes f^n(x, y)}$  from unity on a large length scale compared to that of  $h(x, y)$  would result in a large correction to yield the new  $f^{n+1}(x, y)$ , while small deviations lead to small corrections<sup>3</sup>. Thus the algorithm nonlinearly approximates the maximum-likelihood estimation of the observed sample.

Unlike direct inversion in the frequency domain as Wiener deconvolution in **Eq. (3)**, this computational process in **Eq. (4)** is conducted in the spatial domain, avoiding the problem of division by null outside of the region of OTF support. **In other words, instead of the direct inversion of the low-pass filter  $H(u, v)$  in the frequency domain ( $G(u, v) = H(u, v) \times F(u, v)$ ), the RL deconvolution iteratively approximates with its inverse Fourier transform, i.e., the convolution kernel  $h(x, y)$  in the spatial domain ( $g(x, y) = h(x, y) \otimes f(x, y)$ ).** In principle, the extension beyond the diffraction limit is possible. It may occur for two reasons: the nonlinearity of the product of  $f^n$  with the other quantities in the square brackets and the prior information of nonnegative values of the object.

Because RL deconvolution will quickly converge to a solution dominated by the noise<sup>5</sup>, it is recommended to stop the reconstruction after a small number of iterations in practice. However, if the spatial frequency is sufficiently enormous, many iterations will be necessary to extract all the information<sup>6</sup>. To test this idea, we have synthesized a ground-truth, noise-free image containing various-shaped structures. After the image was convolved with a Gaussian PSF (FWHM of  $\sim 90$  nm), we manually set spatial frequency beyond 90 nm to zero, which trimmed off much of the high-frequency information. Thus the blurred image resembled that obtained by optical microscopy of limited bandwidths. Unexpectedly, parallel lines with the spacing of 60 nm can be resolved after RL deconvolution for  $2 \times 10^4$  iterations, whereas their intensities also became more uniform upon even more iterations (**Supplementary Fig. 1**). Therefore, our simulation confirmed that many iterations of RL deconvolution extended bandwidth in synthetic images without noise, thus recovering the missing information<sup>7</sup>. This simulation echoed the mathematical bandwidth extrapolation idea first proposed by Wolter<sup>8</sup>, and later summarized in Goodman's book<sup>9</sup>. For an optical system, it follows that if an object has a finite size,



a unique analytic function exists that coincides inside  $G(u, v)$ . By extrapolating the observed spectrum using *analytic continuation*<sup>10</sup> or the Gerchberg algorithm<sup>1</sup>, it is possible in principle to reconstruct the object with arbitrary precision under noise-free conditions.

Despite the theoretical feasibility of mathematical SR, out-of-band extrapolation is usually unstable due to noise in data. The noise in actual experiments may not be an analytic function, thus allowing no solution to the bandwidth extrapolation based on analytic continuation<sup>10</sup>. From the perspective of information capacity, bandwidth extrapolation based on analytic continuation extends the spatial bandwidth at the price of the signal-to-noise ratio (SNR). For object fields containing large space-bandwidth products, even a small extension of spatial bandwidth leads to greatly amplified noise in the final reconstruction<sup>11, 12</sup>.

To demonstrate possible effects of noise on RL deconvolution, we simulated parallel lines blurred with PSF (FWHM of  $\sim 90$  nm), spacing from 10 nm to 100 nm, and increasing at the interval of 10 nm (**Supplementary Fig. 2**). Without noise, 2000 iterations of RL deconvolution correctly resolved lines 10 nm apart (**Supplementary Fig. 2c**); in contrast, adding the Poisson noise rendered excessive RL iterations improper, thus parallel lines with a distance smaller than 70 nm could not be resolved without many artifacts. The RL deconvolution became less effective in increasing resolution as more Gaussian noise was added to the image (**Supplementary Fig. 2, e1-e3**). Therefore, classic RL deconvolution may not enhance the resolution of images corrupted with noise such as those captured by real-world microscopes, which agrees with the majority of the imaging community's belief-the Rayleigh diffraction limit represents a practical frontier that cannot be overcome with a conventional imaging system<sup>9</sup>.

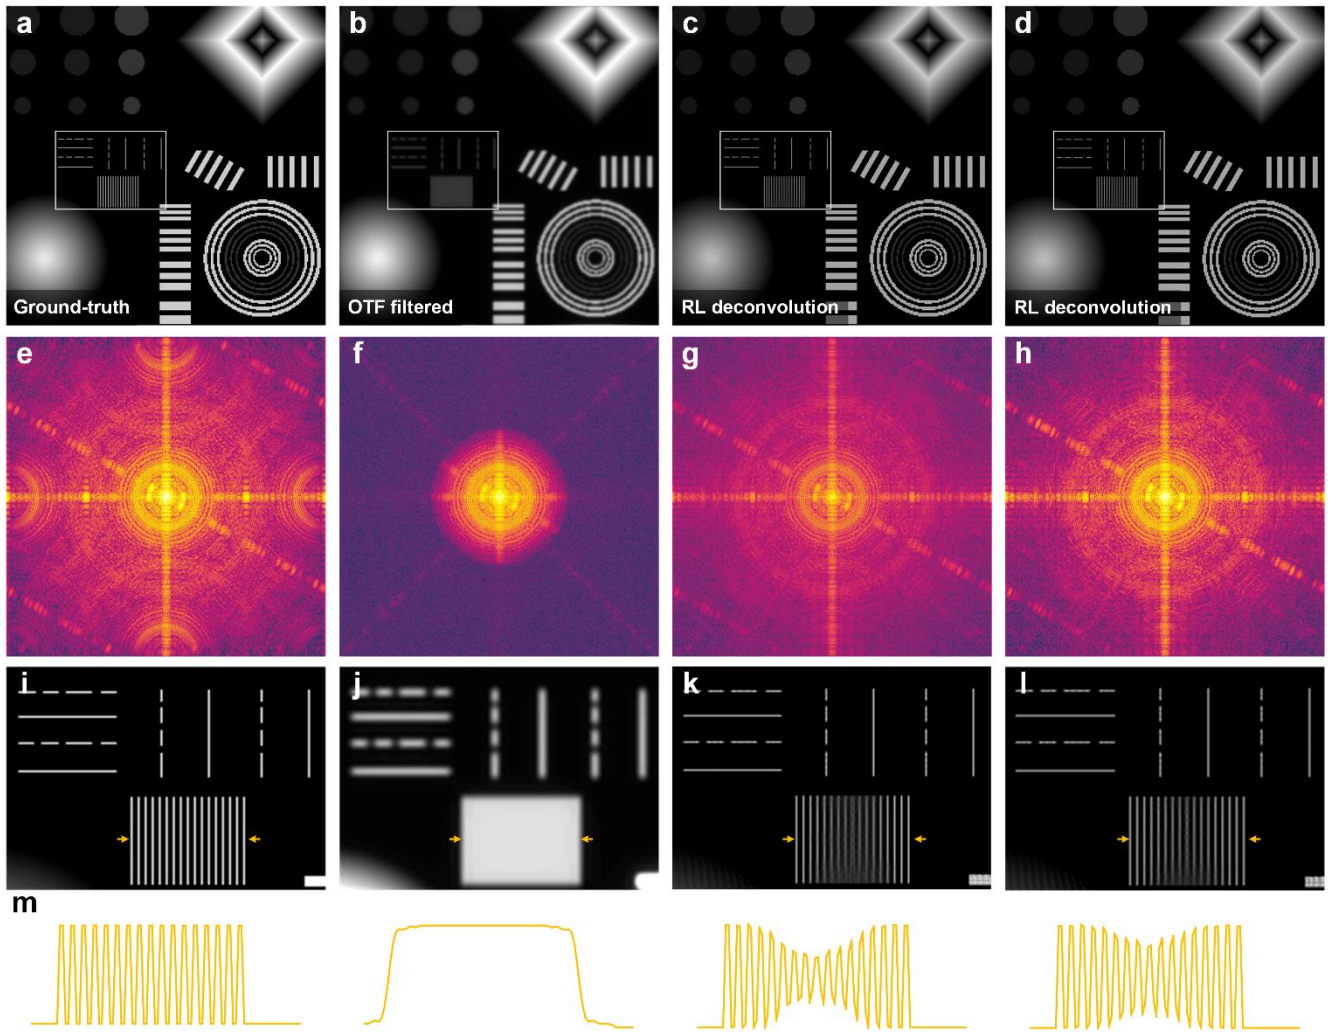

**Supplementary Fig. 1 | Low-pass filtered image recovered by RL deconvolution under noise-free condition.** (a) The ground-truth contains synthetic various-shaped structures with a pixel size of 20 nm. (b) The low-pass filtered (equal to 90 nm resolution) image of (a). (c) RL deconvolution result of (b) with  $2 \times 10^4$  iterations. (d) RL deconvolution with  $2 \times 10^5$  iterations. (e-h) Fourier transforms of (a-d). (i-l) Magnified views of white boxes from (a-d). (m) The corresponding profiles are taken from the regions between the yellow arrowheads in (i-l).

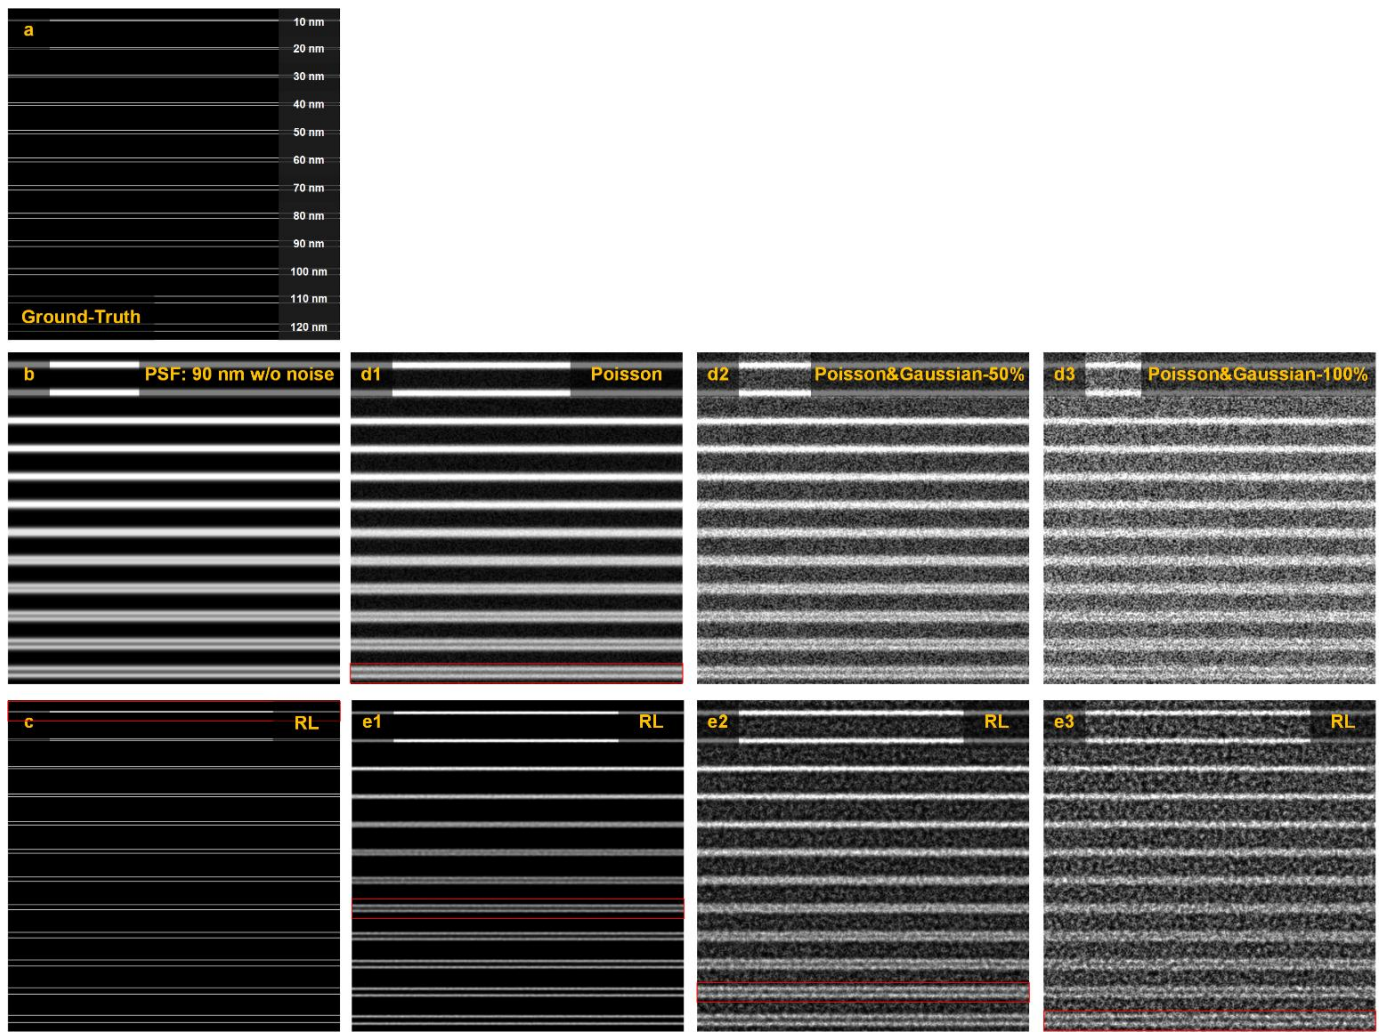

**Supplementary Fig. 2 | The evolution of noise effects on parallel paired-line structures resolved by the RL-deconvolution.** (a-b) We created a ground-truth containing twelve parallel paired lines departed with different distances (from 10 nm to 120 nm), and convoluted by a PSF with a 90 nm FWHM. (c) Without any synthetic noise (and sufficient spatial sampling, 10 nm/pixel), the RL-deconvolution could distinguish paired lines 10 nm apart. (d1-d4) We simulated images captured by real-world microscopes with large pixel sizes and different noise levels. After downsampling the image in (b) by two folds (20 nm/pixel), we added Poisson (d1), Poisson + 10% Gaussian (d2), Poisson + 50% Gaussian (d3), and Poisson + 100% Gaussian (d4) noise. (e1-e4) Upon introduction of even weak noise, RL-deconvolution failed to resolve paired lines 70 nm apart. In images corrupted with more than 50% Gaussian noise, the RL-deconvolution failed to improve the resolution. We used 2000, 15, 15, 5, and 5 times of iterative deconvolution for images of different noise levels (from 0% to 100%).

### Supplementary Note 3 | The development of the sparse deconvolution model.

As explained in **Supplementary Note 2**, noise ultimately limited any possible extension in resolution by the RL deconvolution. Under any fluorescence microscopes, images captured by the photoelectric sensor<sup>13</sup> can be regarded as the convolution of the object with the point spreading function (PSF) of the microscope. Thus a fluorescent image can be expressed as:

$$image = \mathcal{N} \left\{ \mathcal{S} \left[ (I(\omega) \times x(\omega)) \otimes A(\omega, \theta) \right] \right\}, \quad (5)$$

where  $\omega$  is the spatial coordinate, and  $I$ ,  $x$ , and  $A$  represent the illumination, the objective, and the PSF of the microscope, respectively. The  $\mathcal{S}$  and  $\mathcal{N}$  denote the sampling and noise. The *image* is the final collected image of the microscope, and  $\theta$  is the aberration in the microscope.

In real optical instruments, deviations may arise from the Poisson noise intrinsic to the observation, the inevitable read-out noise of the hardware<sup>14-18</sup>, the existence of aberration in the optical path<sup>19</sup>, and the effect of finite sampling<sup>20, 21</sup>. To accurately deconvolve the object from images corrupted with noise always confers an ill-posed inverse problem. Therefore, by building up a constraint model using the prior knowledge widely shared by fluorescent microscopes, we wanted to decode the fluorescent signals as close to their ground-truth positions as possible. Taken an example of single-molecule localization microscopy (SMLM), it achieves super-resolution down to 10~20 nm by assuming each isolated fluorescence puncta stemmed from a single molecule<sup>22, 23</sup>. However, such strong prior knowledge needs specifically designed instruments and fluorescent probes, which may not apply to conventional microscopes. Therefore, we introduce two pieces of prior knowledge, i.e., sparsity and continuity, which are common features of fluorescence generation that can be used in our reconstruction model to achieve super-resolution.

#### Continuity in $xy$ - $t(z)$ axes:

For any microscope systems, to ensure sufficient Nyquist sampling criteria for maximal spatial resolution dictated by the optics, their PSF must occupy more than  $3 \times 3$  pixels in space (**Supplementary Fig. 3**), which constitutes the basis for the continuity along  $x$  and  $y$  axes of any fluorescence microscope<sup>24</sup>. Moreover, if the distance that the biological sample moved between two consecutive time points was smaller than the microscope's lateral resolution, structures were considered to be continuous along the  $t$  axis. Given that cells may demonstrate high-speed dynamics sometimes (such as  $\text{Ca}^{2+}$  diffusion within live cells, **Extended Data Fig. 17**), the parameter for the continuity along  $t$  axis can be turned off under those conditions. As we have demonstrated earlier, the application of continuity constraint substantially suppresses reconstruction artifacts caused by Gaussian-type random noise<sup>24</sup>.

## Sparsity:

Although the application of continuity a priori can increase the SNR, it also obscures the image and reduces the resolution. For any fluorescence microscopes, an increase in spatial resolution always leads to smaller PSF. Thus, as compared with a conventional microscope, the convolution of the object with the smaller PSF in super-resolution images always confers relative sparsity. Therefore, we propose introducing the sparsity as another prior knowledge to extract the fluorescent object's high-frequency information.

Absolute sparsity ( $\ell_0$  norm, the total number of non-zero elements) has been linked with compressive sensing (CS), which has been successfully applied to different fields of signal processing<sup>25-27</sup>. If the signal is sparse (mostly zeros) or sparse after some transformations, CS can precisely recover the signal from the highly noisy or corrupted measurements<sup>25</sup>. However, instead of  $\ell_0$  norm (only absolute sparsity) used as the start point in CS theory, we directly used the  $\ell_1$  norm (sparsity score in **Supplementary Fig. 3a**), i.e., the sum of absolute values of all elements.

We simulated an array of sparsely distributed fluorescence molecules and the diffusive square fluorescence structures without fluorescence at the array complementary to the previous structure, and convolve these ground truth structures with PSFs of variable sizes to mimic images detected by microscopes of different spatial resolutions. No matter whether these structures were absolutely sparse or not, we showed that the sparsity scores of images of the high resolution were always smaller than those of low resolution (**Supplementary Fig. 3a, 3b**). Therefore, our sparsity term can handle both absolutely and relatively sparse structures and constrain the extraction of high spatial frequency information, as shown in numerous examples listed in **Supplementary Fig.4**.

In summary, the continuity means positively correlated fluorescence among neighboring  $2 \times 2$  or  $3 \times 3$  pixels, which equals the size of PSF of the microscope under the efficient sampling condition required by the Nyquist sampling theorem. On the other hand, any captured microscope images are always denser than the real object because of the convolution of the object with the system PSF, and high resolution always means an increase in relative sparsity (**Supplementary Fig. 3c**). Therefore, we believe that continuity and sparsity are general features of the fluorescence microscope, which could be used as the prior knowledge to suppress noise and facilitate high-frequency information extraction collaboratively (**Supplementary Fig. 3c-3d**).

## The sparse deconvolution model:

Therefore, we have proposed the following loss function containing these two priors, in which the Hessian matrix continuity to reduce artifacts and increase robustness at the price of reduced resolution, and the sparsity

to balance the extraction of high-frequency information, which gives:

$$\arg \min_{\mathbf{x}, \mathbf{b}} \left\{ \frac{\lambda}{2} \|\mathbf{f} - \mathbf{b} - \mathbf{A}\mathbf{x}\|_2^2 + R_{\text{Hessian}}(\mathbf{x}) + \lambda_{L1} \|\mathbf{x}\|_1 \right\}. \quad (6)$$

The first term on the left side of the equation is the fidelity term, representing the distance between the recovered image  $\mathbf{x}$  and the result obtained with the Wiener filtered SIM image  $\mathbf{f}$ .  $\mathbf{A}$  is the PSF of the optical system. Here,  $\mathbf{b}$  is the background, which is assumed to be smooth, varying in the whole field-of-view. We involved such background  $\mathbf{b}$  in **Eq. (6)**, considering that the fluorescent images may contain strong background components from the out-of-focus emission light, fluorescent background, and cellular autofluorescence. We estimated and removed such background fluorescence, which is critical for the high-fidelity reconstruction of objects inside the cell. The second and third terms are the continuity and sparsity priors, respectively.  $\|\cdot\|_1$  and  $\|\cdot\|_2$  are the  $\ell_1$  and  $\ell_2$  norms, respectively, and  $\lambda$  and  $\lambda_{L1}$  denote weight factors to balance image fidelity with sparsity. The continuity prior regarding the structural continuity along the  $xy$ - $t(z)$  axes is defined as follows:

$$\begin{aligned} R_{\text{Hessian}}(\mathbf{g}) &= \left\| \begin{bmatrix} \mathbf{g}_{xx} & \mathbf{g}_{xy} & \sqrt{\lambda_t} \mathbf{g}_{xt} \\ \mathbf{g}_{yx} & \mathbf{g}_{yy} & \sqrt{\lambda_t} \mathbf{g}_{yt} \\ \sqrt{\lambda_t} \mathbf{g}_{tx} & \sqrt{\lambda_t} \mathbf{g}_{ty} & \lambda_t \mathbf{g}_{tt} \end{bmatrix} \right\|_1. \\ &= \|\mathbf{g}_{xx}\|_1 + \|\mathbf{g}_{yy}\|_1 + \lambda_t \|\mathbf{g}_{tt}\|_1 + 2\|\mathbf{g}_{xy}\|_1 + 2\sqrt{\lambda_t} \|\mathbf{g}_{xt}\|_1 + 2\sqrt{\lambda_t} \|\mathbf{g}_{yt}\|_1 \end{aligned} \quad (7)$$

In **Eq. (7)**,  $\lambda_t$  denotes the regularization parameters that present the continuity along the  $t$  axis, which can be turned off upon imaging objects moving at high speed. Besides, we split the prior knowledge constrain and deconvolution subproblems into a two-step operation to gradually and effectively search the final solution  $\mathbf{x}$ . The full three-step is given as follow:

**Step. 0 (optional):** Because not all of the samples may have the background (listed in **Supplementary Table 4**), we estimate the background  $\mathbf{b}$  in **Eq. (6)** by an optional isolate step before iterative optimization. We used a modified iterative wavelet transform method (lowest frequency wavelet bands of  $\mathbf{f}$ ) to estimate  $\mathbf{b}$ <sup>28</sup>.

**Step. 1:** We solve the **Eq. (6)** gradually with the following **Eqs. (8) and (9)**. The detailed procedure of **Step. 1** can be found in **Supplementary Note 4.1**.

$$\arg \min_{\mathbf{g}} \left\{ \frac{\lambda}{2} \|\mathbf{f} - \mathbf{b} - \mathbf{g}\|_2^2 + R_{\text{Hessian}}(\mathbf{g}) + \lambda_{L1} \|\mathbf{g}\|_1 \right\}. \quad (8)$$

**Step. 2:** Iterative deconvolution to achieve final solution  $\mathbf{x}$ . The detailed procedure can be found in **Supplementary Note 4.2**.

$$\arg \min_{\mathbf{x}} \left\{ \|\mathbf{g} - \mathbf{A}\mathbf{x}\|_2^2 \right\}. \quad (9)$$

245 Because the pixel size reconstructed may not match with the improved resolution, we introduce a pre  
246 upsampling step (optional, marked as  $\times 2$ ) to reconstruct the structure on smaller grids before the execution of  
247 **Step. 1**. The detailed notation is provided in **Supplementary Note 4.4**.



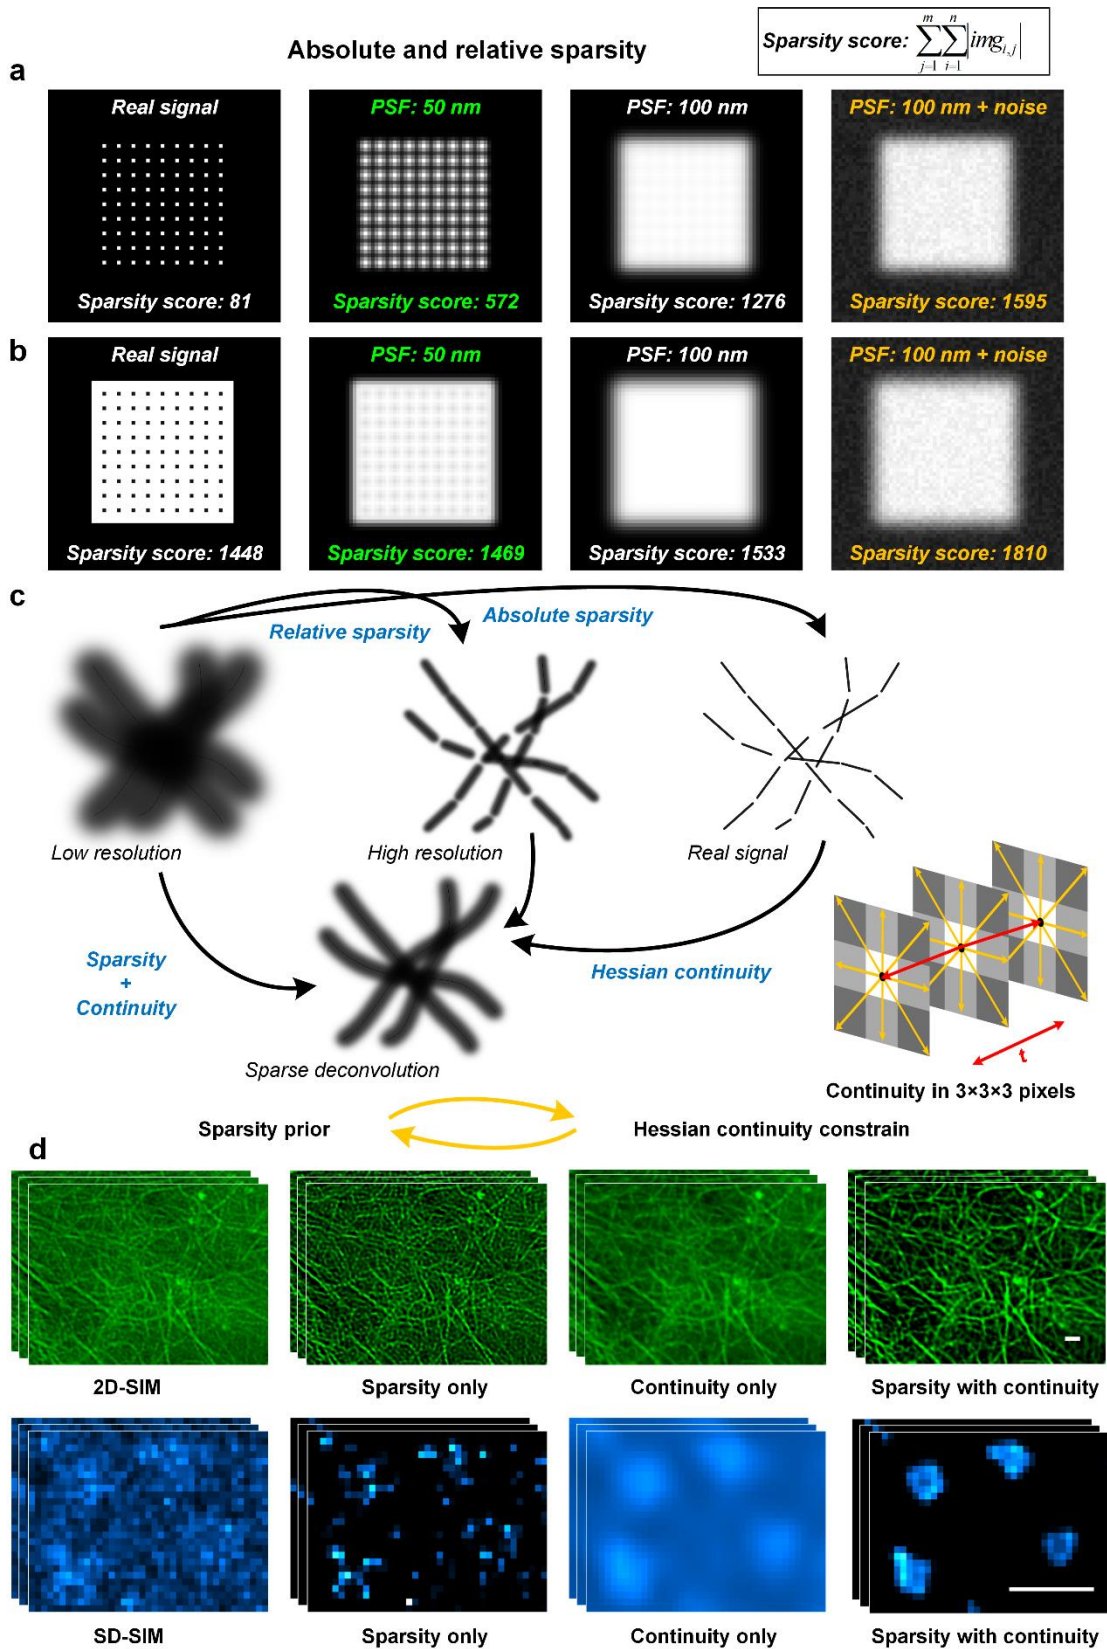

**Supplementary Fig. 3 | The concept of sparse deconvolution.** (a, b) Specific examples for absolute (a) and relative (b) sparsity. (c) Visualization of the working process of our sparse deconvolution. (d) Reconstructions with only sparsity, only continuity, or both the sparsity and continuity priors. Actin filaments labeled with LifeAct-EGFP in a live COS-7 cell in **Fig. 4a** under 2D-SIM (left, top panel) and CCPs labeled by Clathrin-EGFP in **Fig. 5a** under SD-SIM (left, bottom panel), followed by sparsity-constraint deconvolution (middle left), continuity-constraint deconvolution (middle right), or both sparsity and continuity-constraint deconvolution (right). Scale bars: 500 nm.



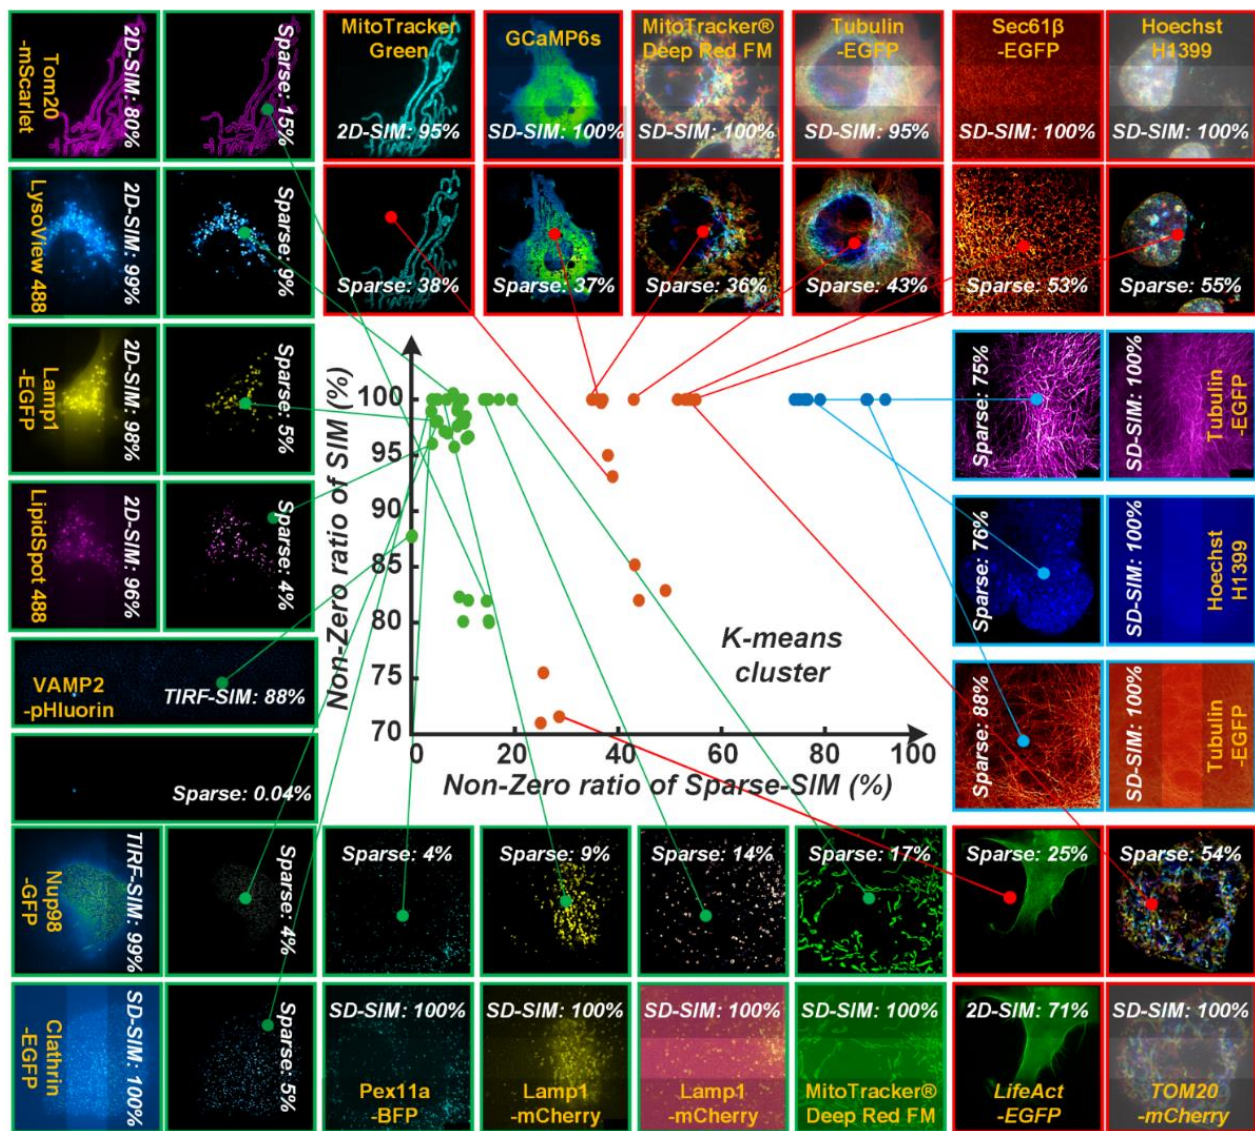

**Supplementary Fig. 4 | Different decreases in non-zero ratios of images after the sparse deconvolution.**

We collected the number of non-zero values of images of this paper before and after our sparse deconvolution (details also in **Supplementary Table 4**). To demonstrate these numbers more clearly, they are normalized by the total pixel number of images. The resulting ratios could be clustered by the K-means method<sup>29</sup> into three categories in different colors (green, red, and blue). Each scatter denotes a non-zero ratio of one frame before (x-axis) and after (y-axis) the sparse deconvolution.

## Supplementary Note 4 | The details of algorithm execution.

### Supplementary Note 4.1 | Iterative approximation based on the weighted constraints.

Searching for the best solution of the loss function in **Eq. (8)** can be translated into a convex optimization problem (COP). To do that, we adopted the split Bregman algorithm widely used in total variance (TV) problems<sup>30</sup> due to its fast convergence speed. Using Bregman splitting, we first replaced variable  $\mathbf{g}$  with the intermediate variable  $\mathbf{u}$ . Then, the loss function could be transformed into a constrained minimization problem:

$$\min_{\mathbf{g}, \mathbf{u}} \left\{ \frac{\lambda}{2} \|\mathbf{f} - \mathbf{b} - \mathbf{g}\|_2^2 + \varphi(\mathbf{u}) \right\} = \min_{\mathbf{g}, \mathbf{u}} \left\{ \frac{\lambda}{2} \|\mathbf{f} - \mathbf{b} - \mathbf{g}\|_2^2 + \|\mathbf{u}_{xx}\|_1 + \|\mathbf{u}_{yy}\|_1 + \|\mathbf{u}_{tt}\|_1 + \|\mathbf{u}_{xy}\|_1 + \|\mathbf{u}_{xt}\|_1 + \|\mathbf{u}_{yt}\|_1 + \|\mathbf{u}\|_1 \right\}, \quad (10)$$

in which  $\mathbf{u}_{xx} = \mathbf{g}_{xx}$ ,  $\mathbf{u}_{yy} = \mathbf{g}_{yy}$ ,  $\mathbf{u}_{tt} = \lambda_t \cdot \mathbf{g}_{zz}$ ,  $\mathbf{u}_{xy} = 2 \cdot \mathbf{g}_{xy}$ ,  $\mathbf{u}_{xt} = 2\sqrt{\lambda_t} \cdot \mathbf{g}_{xt}$ ,  $\mathbf{u}_{yt} = 2\sqrt{\lambda_t} \cdot \mathbf{g}_{yt}$ ,  $\mathbf{u} = \lambda_{L1} \cdot \mathbf{g}$ .

By using the Lagrange multiplier method to enforce the constraints weakly, we obtained the following unconstrained problem:

$$\min_{\mathbf{g}, \mathbf{u}} \left\{ \frac{\lambda}{2} \|\mathbf{f} - \mathbf{b} - \mathbf{g}\|_2^2 + \varphi(\mathbf{u}) + \frac{\mu}{2} \cdot \left[ \|\mathbf{u}_{xx} - \mathbf{g}_{xx}\|_2^2 + \|\mathbf{u}_{yy} - \mathbf{g}_{yy}\|_2^2 + \|\mathbf{u}_{tt} - \lambda_t \cdot \mathbf{g}_{tt}\|_2^2 + \|\mathbf{u}_{xy} - 2 \cdot \mathbf{g}_{xy}\|_2^2 + \|\mathbf{u}_{xt} - 2\sqrt{\lambda_t} \cdot \mathbf{g}_{xt}\|_2^2 + \|\mathbf{u}_{yt} - 2\sqrt{\lambda_t} \cdot \mathbf{g}_{yt}\|_2^2 + \|\mathbf{u} - \lambda_{L1} \cdot \mathbf{g}\|_2^2 \right] \right\}, \quad (11)$$

where  $\mu$  is the Lagrange multiplier. Finally, we strictly enforced the constraints by applying the simplified Bregman iteration, which was proved by Goldstein and Osher<sup>31</sup>:

$$\min_{\mathbf{g}, \mathbf{u}} \left\{ \frac{\lambda}{2} \|\mathbf{f} - \mathbf{b} - \mathbf{g}\|_2^2 + \varphi(\mathbf{u}) + \frac{\mu}{2} \cdot \left[ \|\mathbf{u}_{xx} - \mathbf{g}_{xx} - \mathbf{v}_{xx}\|_2^2 + \|\mathbf{u}_{yy} - \mathbf{g}_{yy} - \mathbf{v}_{yy}\|_2^2 + \|\mathbf{u}_{tt} - \lambda_t \cdot \mathbf{g}_{tt} - \mathbf{v}_{tt}\|_2^2 + \|\mathbf{u}_{xy} - 2 \cdot \mathbf{g}_{xy} - \mathbf{v}_{xy}\|_2^2 + \|\mathbf{u}_{xt} - 2\sqrt{\lambda_t} \cdot \mathbf{g}_{xt} - \mathbf{v}_{xt}\|_2^2 + \|\mathbf{u}_{yt} - 2\sqrt{\lambda_t} \cdot \mathbf{g}_{yt} - \mathbf{v}_{yt}\|_2^2 + \|\mathbf{u} - \lambda_{L1} \cdot \mathbf{g} - \mathbf{v}\|_2^2 \right] \right\}, \quad (12)$$

where  $\mathbf{v}$  is used to reduce the computational complexity in the iteration.

The iterative minimization procedure is given as follows:

$$\mathbf{g}^{k+1} = \min_{\mathbf{g}} \left\{ \frac{\lambda}{2} \|\mathbf{f} - \mathbf{b} - \mathbf{g}\|_2^2 + \frac{\mu}{2} \cdot \left[ \|\mathbf{u}_{xx} - \mathbf{g}_{xx} - \mathbf{v}_{xx}\|_2^2 + \|\mathbf{u}_{yy} - \mathbf{g}_{yy} - \mathbf{v}_{yy}\|_2^2 + \|\mathbf{u}_{tt} - \lambda_t \cdot \mathbf{g}_{tt} - \mathbf{v}_{tt}\|_2^2 + \|\mathbf{u}_{xy} - 2 \cdot \mathbf{g}_{xy} - \mathbf{v}_{xy}\|_2^2 + \|\mathbf{u}_{xt} - 2\sqrt{\lambda_t} \cdot \mathbf{g}_{xt} - \mathbf{v}_{xt}\|_2^2 + \|\mathbf{u}_{yt} - 2\sqrt{\lambda_t} \cdot \mathbf{g}_{yt} - \mathbf{v}_{yt}\|_2^2 + \|\mathbf{u} - \lambda_{L1} \cdot \mathbf{g} - \mathbf{v}\|_2^2 \right] \right\}. \quad (13)$$

$$\begin{aligned}
\mathbf{u}_{xx}^{k+1} &= \min_{\mathbf{u}_{xx}} \left\{ \|\mathbf{u}_{xx}\|_1 + \frac{\mu}{2} \cdot \|\mathbf{u}_{xx} - \mathbf{g}_{xx}^{k+1} - \mathbf{v}_{xx}^k\|_2^2 \right\} \\
\mathbf{u}_{yy}^{k+1} &= \min_{\mathbf{u}_{yy}} \left\{ \|\mathbf{u}_{yy}\|_1 + \frac{\mu}{2} \cdot \|\mathbf{u}_{yy} - \mathbf{g}_{yy}^{k+1} - \mathbf{v}_{yy}^k\|_2^2 \right\} \\
\mathbf{u}_{tt}^{k+1} &= \min_{\mathbf{u}_{tt}} \left\{ \|\mathbf{u}_{tt}\|_1 + \frac{\mu}{2} \cdot \|\mathbf{u}_{tt} - \lambda_t \cdot \mathbf{g}_{tt}^{k+1} - \mathbf{v}_{tt}^k\|_2^2 \right\} \\
\mathbf{u}_{xy}^{k+1} &= \min_{\mathbf{u}_{xy}} \left\{ \|\mathbf{u}_{xy}\|_1 + \frac{\mu}{2} \cdot \|\mathbf{u}_{xy} - \lambda_z \cdot \mathbf{g}_{xy}^{k+1} - \mathbf{v}_{xy}^k\|_2^2 \right\} \\
\mathbf{u}_{xt}^{k+1} &= \min_{\mathbf{u}_{xt}} \left\{ \|\mathbf{u}_{xt}\|_1 + \frac{\mu}{2} \cdot \|\mathbf{u}_{xt} - 2\sqrt{\lambda_t} \cdot \mathbf{g}_{xt}^{k+1} - \mathbf{v}_{xt}^k\|_2^2 \right\} \\
\mathbf{u}_{yt}^{k+1} &= \min_{\mathbf{u}_{yt}} \left\{ \|\mathbf{u}_{yt}\|_1 + \frac{\mu}{2} \cdot \|\mathbf{u}_{yt} - 2\sqrt{\lambda_t} \cdot \mathbf{g}_{yt}^{k+1} - \mathbf{v}_{yt}^k\|_2^2 \right\} \\
\mathbf{u}^{k+1} &= \min_{\mathbf{u}} \left\{ \|\mathbf{u}\|_1 + \frac{\mu}{2} \cdot \|\mathbf{u} - \lambda_{L1} \cdot \mathbf{g}^{k+1} - \mathbf{v}^k\|_2^2 \right\}
\end{aligned} \tag{14}$$

$$\begin{aligned}
\mathbf{v}_{xx}^{k+1} &= \mathbf{v}_{xx}^k + \mathbf{g}_{xx}^k - \mathbf{u}_{xx}^k \\
\mathbf{v}_{yy}^{k+1} &= \mathbf{v}_{yy}^k + \mathbf{g}_{yy}^k - \mathbf{u}_{yy}^k \\
\mathbf{v}_{tt}^{k+1} &= \mathbf{v}_{tt}^k + \lambda_t \cdot \mathbf{g}_{tt}^k - \mathbf{u}_{tt}^k \\
\mathbf{v}_{xy}^{k+1} &= \mathbf{v}_{xy}^k + 2 \cdot \mathbf{g}_{xy}^k - \mathbf{u}_{xy}^k \\
\mathbf{v}_{xt}^{k+1} &= \mathbf{v}_{xt}^k + 2\sqrt{\lambda_t} \cdot \mathbf{g}_{xt}^k - \mathbf{u}_{xt}^k \\
\mathbf{v}_{yt}^{k+1} &= \mathbf{v}_{yt}^k + 2\sqrt{\lambda_t} \cdot \mathbf{g}_{yt}^k - \mathbf{u}_{yt}^k \\
\mathbf{v}^{k+1} &= \mathbf{v}^k + \lambda_{L1} \cdot \mathbf{g}^k - \mathbf{u}^k
\end{aligned} \tag{15}$$

Using **Eqs. (13–15)**, the COP is split into three steps (smooth convex). Then, the final iterative steps can be written as follows:

$$\begin{aligned}
\mathbf{g}^{k+1} &= \text{iFFT} \left( \frac{\text{FFT}(\mathbf{L}_{sHe}^k) + \frac{\lambda}{\mu} \cdot \text{FFT}(\mathbf{f} - \mathbf{b})}{\text{FFT}(\nabla_{xx}^2 + \nabla_{yy}^2 + \lambda_t^2 \cdot \nabla_{tt}^2 + 4 \cdot \nabla_{xy}^2 + 4\lambda_t \cdot \nabla_{xt}^2 + 4\lambda_t \cdot \nabla_{yt}^2) + \lambda_{L1}^2 + \frac{\lambda}{\mu}} \right), \\
\mathbf{L}_{sHe}^k &= \left\{ \begin{aligned} &\nabla_{xx}^T (\mathbf{u}_{xx}^k - \mathbf{v}_{xx}^k) + \nabla_{yy}^T (\mathbf{u}_{yy}^k - \mathbf{v}_{yy}^k) + \lambda_z \cdot \nabla_{tt}^T (\mathbf{u}_{tt}^k - \mathbf{v}_{tt}^k) + 2 \cdot \nabla_{xy}^T (\mathbf{u}_{xy}^k - \mathbf{v}_{xy}^k) \\ &+ 2\sqrt{\lambda_t} \cdot \nabla_{xt}^T (\mathbf{u}_{xt}^k - \mathbf{v}_{xt}^k) + 2\sqrt{\lambda_t} \cdot \nabla_{yt}^T (\mathbf{u}_{yt}^k - \mathbf{v}_{yt}^k) + \lambda_{L1} (\mathbf{u}^k - \mathbf{v}^k) \end{aligned} \right\}
\end{aligned} \tag{16}$$

where the FFT (iFFT) denotes the (inverse) fast Fourier transforms,  $\nabla_{xx}$  is the two-order derivation operator in the  $x$ -direction:  $\nabla_{xx} = [1, -2, 1]$ , and  $\nabla_{yy}$ ,  $\nabla_{tt}$ ,  $\nabla_{xy}$ ,  $\nabla_{xt}$ ,  $\nabla_{yt}$  are similarly defined:

$$\begin{aligned}
\mathbf{u}_{xx}^{k+1} &= \begin{cases} \mathbf{g}_{xx}^{k+1} + \mathbf{v}_{xx}^k - \frac{1}{\mu}, & \mathbf{g}_{xx}^{k+1} + \mathbf{v}_{xx}^k \in \left(\frac{1}{\mu}, \infty\right) \\ 0, & \mathbf{g}_{xx}^{k+1} + \mathbf{v}_{xx}^k \in \left(-\frac{1}{\mu}, \frac{1}{\mu}\right) \\ \mathbf{g}_{xx}^{k+1} + \mathbf{v}_{xx}^k + \frac{1}{\mu}, & \mathbf{g}_{xx}^{k+1} + \mathbf{v}_{xx}^k \in \left(-\infty, -\frac{1}{\mu}\right) \end{cases} \\
&= \text{shrink}\left(\mathbf{g}_{xx}^{k+1} + \mathbf{v}_{xx}^k, \frac{1}{\mu}\right) \\
\mathbf{u}_{yy}^{k+1} &= \text{shrink}\left(\mathbf{g}_{yy}^{k+1} + \mathbf{v}_{yy}^k, \frac{1}{\mu}\right) \\
\mathbf{u}_{tt}^{k+1} &= \text{shrink}\left(\lambda_t \cdot \mathbf{g}_{tt}^{k+1} + \mathbf{v}_{tt}^k, \frac{1}{\mu}\right) \\
\mathbf{u}_{xy}^{k+1} &= \text{shrink}\left(2 \cdot \mathbf{g}_{xy}^{k+1} + \mathbf{v}_{xy}^k, \frac{1}{\mu}\right) \\
\mathbf{u}_{xt}^{k+1} &= \text{shrink}\left(2\sqrt{\lambda_t} \cdot \mathbf{g}_{xt}^{k+1} + \mathbf{v}_{xt}^k, \frac{1}{\mu}\right) \\
\mathbf{u}_{yt}^{k+1} &= \text{shrink}\left(2\sqrt{\lambda_t} \cdot \mathbf{g}_{yt}^{k+1} + \mathbf{v}_{yt}^k, \frac{1}{\mu}\right) \\
\mathbf{u}^{k+1} &= \text{shrink}\left(\lambda_{L1} \cdot \mathbf{g}^{k+1} + \mathbf{v}^k, \frac{1}{\mu}\right)
\end{aligned} \tag{17}$$

Using **Eqs. (15–17)**, the COP can easily be resolved.

#### Supplementary Note 4.2 | Iterative deconvolution.

To achieve the final solution  $\mathbf{x}$ , we iterative minimize the **Eq. (10)**. For the data with a high SNR, we applied the Landweber (LW) deconvolution<sup>32</sup>, in which the gradient descent method with Nesterov momentum acceleration was used<sup>33</sup>:

$$\begin{aligned}
\mathbf{y}^{(j+1)} &= \mathbf{x}^{(j+1)} + \beta_j (\mathbf{x}^{(j)} - \mathbf{x}^{(j-1)}) \\
\mathbf{x}^{(j+1)} &= \mathbf{y}^{(j+1)} + \mathbf{A}^T (\mathbf{g} - \mathbf{A} \mathbf{y}^{(j+1)}) \\
\gamma^j &= \frac{1}{2} \left( 4\gamma_{j-1}^2 + \gamma_{j-1}^4 \right)^{\frac{1}{2}} - \gamma_{j-1}^2, \\
\beta_j &= 1 - \gamma_{j-1}^{-1}
\end{aligned} \tag{18}$$

where  $\mathbf{g}$  is the image after sparsity reconstruction and  $\mathbf{x}^{j+1}$  is the image after  $j+1$  iterations. Iteration is terminated at an early stage to constrain the resulting data to avoid artifacts<sup>34</sup>. The numbers of deconvolution iterations are listed in the parameter table in the user manual of **Supplementary Software**.

For the low SNR data corrupted with excessive noise, we used a Bayesian-based Richardson Lucy (RL)<sup>2</sup>,<sup>3</sup> deconvolution algorithm to process these images. The accelerated RL-based deconvolution<sup>35</sup> algorithm

299 follows:

$$\begin{aligned} \mathbf{y}^{j+1} &= \mathbf{x}^j \cdot \left( \mathbf{h}^T \cdot \frac{\mathbf{g}}{\mathbf{h} \cdot \mathbf{x}^j} \right) \\ \mathbf{v}^j &= \mathbf{x}^{j+1} - \mathbf{y}^j \\ \alpha^{j+1} &= \frac{\sum \mathbf{v}^j \cdot \mathbf{v}^{j-1}}{\sum \mathbf{v}^{j-1} \cdot \mathbf{v}^{j-1}}, \\ \mathbf{x}^{j+1} &= \mathbf{y}^{j+1} + \alpha^{j+1} \cdot (\mathbf{y}^{j+1} - \mathbf{y}^j) \end{aligned} \quad (19)$$

301 where  $\mathbf{g}$  is the image after sparsity reconstruction and  $\mathbf{x}^{j+1}$  is the image after  $j+1$  iterations. Specifically, the  
302 adaptive acceleration factor ( $\alpha$ ) was introduced by Andrews *et al.*<sup>35</sup> and represented the computational iteration  
303 step length, which can be estimated directly from experimental results. The accelerated RL algorithm  
304 convergences rapidly, and the required number of iterations 5~10 times less than that of the classical RL  
305 method.

#### 306 **Supplementary Note 4.3 | Background estimation.**

307 To estimate the background  $\mathbf{b}$  appearing in **Eq. (8)**, we modified the iterative wavelet transform method<sup>28</sup>. **For**  
308 **the data that contains weak background or even no background (e.g., TIRF imaging mode), we remove such**  
309 **background estimate operation, i.e., set  $\mathbf{b}$  as zero** (corresponded to the *No Background* in the **Supplementary**  
310 **Table 4**) to avoid removal of information. Images from *low-dose illumination* exhibited a low and stable  
311 noise-like distribution of background fluorescence only. Thus, values over the mean value of the image were  
312 set to zero directly, and the resulting *residual image* was used for the following background estimation. Under  
313 other conditions, we estimated and removed the background as follows:

314 **i.** Original images from *high-dose illumination* containing a strong background fluorescence signal  
315 originating from out-of-focus emissions and cellular autofluorescence were regarded as the *input images* in  
316 the flowchart. The background can be iteratively estimated from the lowest frequency wavelet bands  
317 associated with the *input images* (Wiener filter). To extract the lowest band of the frequency domain, we used  
318 2D Daubechies-6 wavelet filters to decompose the signal up to the 7<sup>th</sup> level.

319 **ii.** To prevent accidental removal of minor useful signals, we performed an inverse wavelet transform on  
320 the lowest band of the frequency information to the spatial domain and compared the result with half of the  
321 square root of the *input image*. We merged these two images by keeping the minimum values at each pixel.  
322 This operation removed high-intensity pixels resulting from inaccurate background estimation.

323 **iii.** The resulting *low band off-peak background* estimation data in **ii** were used again as the *input image*  
324 in **i**, and the abovementioned loop was repeated several times. In general, we set the number of iterations

rounds to three to estimate the background with minimal contribution from the real fluorescent signals.

#### Supplementary Note 4.4 | Upsampling operation.

The pixel size could be the factor that limits SR image reconstruction. For example, although the Sparse SIM's theoretical resolution could reach ~60 nm, the 32.5 nm pixel size may limit its resolution due to the insufficient spatial sampling. Likewise, when we used the EMCCD camera for the SD-SIM, 94 nm pixel size severely limited the resolution that could be achieved by the sparse deconvolution (down to ~90 nm). Therefore, we introduced an upsampling operation in the reconstruction pipeline.

As a result, the loss function in **Eq. (8)** for the sparse reconstruction can be rewritten as follows:

$$\arg \min_{\mathbf{g}} \left\{ \frac{\lambda}{2} \|\mathbf{f} - \mathbf{b} - \mathbf{D}\mathbf{g}\|_2^2 + R_{\text{Hessian}}(\mathbf{g}) + \lambda_{\text{LI}} \|\mathbf{g}\|_1 \right\}, \quad (20)$$

where **D** is the downsampling matrix. In practical, we used the Fourier interpolation to upsample the 2D-SIM data (pad the zeros out of SIM OTF)<sup>36</sup>, and the spatial upsampling method (pad zeros around each pixel) to upsample the SD-SIM data, which was less sensitive to the SNR and less prone to snowflake artifacts.

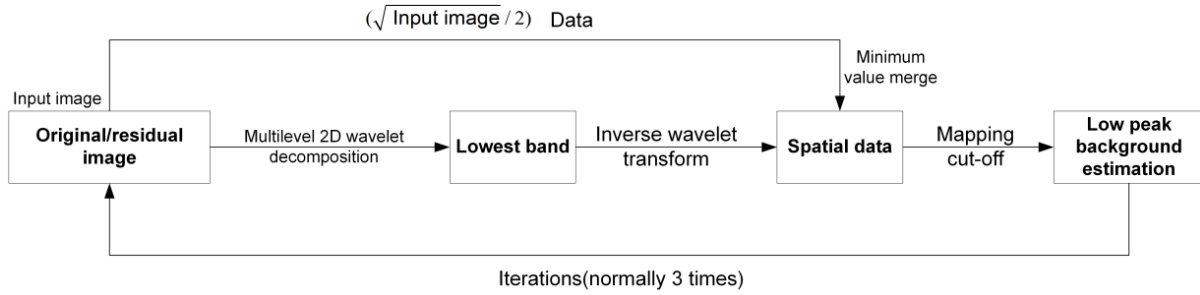

**Supplementary Fig. 5 | Flowchart of background estimation based on multilevel wavelets.**

**Key messages:**

---

**Algorithm | Sparse deconvolution.**

---

**Input:** time-lapse/volumetric image stack  $\mathbf{f}$ **STEP 0.****if** background estimation:Background estimation using the procedure in **Supplementary Note 4.3**.**else:** $\mathbf{b} = 0$ .**Output:**  $\mathbf{b}$ 

---

**Input:**  $\mathbf{f}$ ,  $\mathbf{b}$ ,  $\mathbf{A}$ **STEP 1.****if** upsampling:Minimize **Eq. (20)**:

$$\arg \min_{\mathbf{g}} \left\{ \frac{\lambda}{2} \|\mathbf{f} - \mathbf{b} - \mathbf{D}\mathbf{g}\|_2^2 + \mathbf{R}_{\text{Hessian}}(\mathbf{g}) + \lambda_{\text{L1}} \|\mathbf{g}\|_1 \right\}.$$

**else:**Minimize **Eq. (8)**:

$$\arg \min_{\mathbf{g}} \left\{ \frac{\lambda}{2} \|\mathbf{f} - \mathbf{b} - \mathbf{g}\|_2^2 + \mathbf{R}_{\text{Hessian}}(\mathbf{g}) + \lambda_{\text{L1}} \|\mathbf{g}\|_1 \right\}.$$

**STEP 2.**Minimize **Eq. (9)**:

$$\arg \min_{\mathbf{x}} \left\{ \|\mathbf{g} - \mathbf{A}\mathbf{x}\|_2^2 \right\}.$$

**Output:**  $\mathbf{x}$ 

---

## Supplementary Note 5 | Using the sparse and continuity prior knowledge improves resolution and contrast.

By adding the sparsity and the continuity prior knowledge to constrain the iterative deconvolution, we were able to enhance the resolution of synthetic images of different structures (Extended Data Fig. 2, 3, 4), images captured by the wide-field microscope (Extended Data Fig. 5), and by SIM in resolving the DNA origami structures (Fig. 1), paired lines in the Argo slides (Fig. 2a-2b, Extended Data Fig. 6), fluorescence-labeled nuclear pores (Fig. 2c-2g, Extended Data Fig. 11), actin mesh pores (Fig. 4a-4i), caveolae (Fig. 4j-4l), and intricate intermediate fusion pores (Fig. 4o-4p). However, most of the structures resolved were of regular shapes. To test whether we could use the sparse deconvolution to reconstruct erratic structures, we have synthesized the bisected ring and irregular, periodic lines. As shown in Supplementary Fig. 6, sparse deconvolution was able to resolve these structures correctly.

As the RL deconvolution failed to improve resolution in images corrupted with noise (Supplementary Fig. 2), we wondered how SNR conditions affect our sparse deconvolution performance. Thus, we synthesized parallel paired-lines from 10 nm to 120 nm apart, convolved them with the PSF with 90 nm FWHM, and systematically added Poisson and Gaussian noise of different amplitudes (Supplementary Fig. 7). While the RL deconvolution failed to improve the resolution, the sparse deconvolution consistently outperformed the former in separating paired lines 50~60 nm apart. However, we also noticed that parallel lines under excessive noise sometimes manifested as twisted and fluctuated fluorescence profiles (Supplementary Fig. 7), indicative of artifacts. To quantitatively evaluate the quality of reconstruction, we have proposed a line restoration quality (LRQ) criterion:

$$LRQ = \frac{2 \times \text{Avg}(\text{Region}_0)}{\text{Avg}(\text{Region}_1) + \text{Avg}(\text{Region}_2)} . \quad (21)$$

The  $\text{Region}_1$ ,  $\text{Region}_2$ , and  $\text{Region}_0$  represent the parallel lines and the region in between, and  $\text{Avg}$  calculates the mean intensity of pixels within the corresponding area. Because the LRQ value always decayed rapidly from a stable high plateau to 0.4 as the distance between paired lines decreased, we selected it as the threshold of successful reconstruction (Supplementary Fig. 8). According to this criterion, RL deconvolution stopped at resolving lines 100 nm apart at 50% Gaussian noise, while the sparse deconvolution could separate lines 50 nm apart. **Increasing Gaussian noise limited the ability of the sparse deconvolution in improving resolution.** With 100% Gaussian noise, the sparse deconvolution could reach 60~70 nm resolution. With 150% Gaussian noise, the sparse deconvolution could not faithfully extract information beyond the OTF



(**Supplementary Fig. 8**). However, compared to the RL deconvolution, it significantly increased the contrast of high-frequency information within the OTF and enabled lines 100 nm apart to be separated (**Supplementary Fig. 7**).

These data were also recapitulated in images of real samples taken by microscopes. Under the regular 200 mW illumination and 10 ms exposure (1 SNR), 2D-SIM, RL-SIM, and Sparse-SIM resolved fluorescent lines carved in the commercial Argo-SIM slide 150, 120, and 60 nm apart, respectively (**Extended Data Fig. 9**). Sparse-SIM resolution deteriorated to 90 nm under 25 mW illumination and 10 ms exposure (1/8 SNR) and returned to the optical limit of ~120 nm under 25 mW illumination and 5 ms exposure (1/16 SNR). Despite the failure to extend resolution at this extremely low SNR, sparse deconvolution was superior to the 2D-SIM and RL-SIM in generating reconstructions of good contrast and minimal artifacts. Finally, in the live COS-7 cell weakly expressed with tubulin-EGFP, images captured by SD-SIM were of low SNR (**Supplementary Fig. 9**). Under such a circumstance, the FRC resolutions of images under the SD-SIM and RL SD-SIM were similar (~250 nm). In contrast, although Sparse SD-SIM did not increase resolution beyond the system OTF, it increased the image contrast to ensure the maximal resolution allowed by the optics (~130 nm).

**Key messages:**

- 1) Reconstructing with the sparse and the continuity prior constrains the following RL deconvolution to increase resolution in images with noise.
- 2) In images corrupted with excessive noise, the sparse deconvolution pipeline improves the contrast but not the resolution.

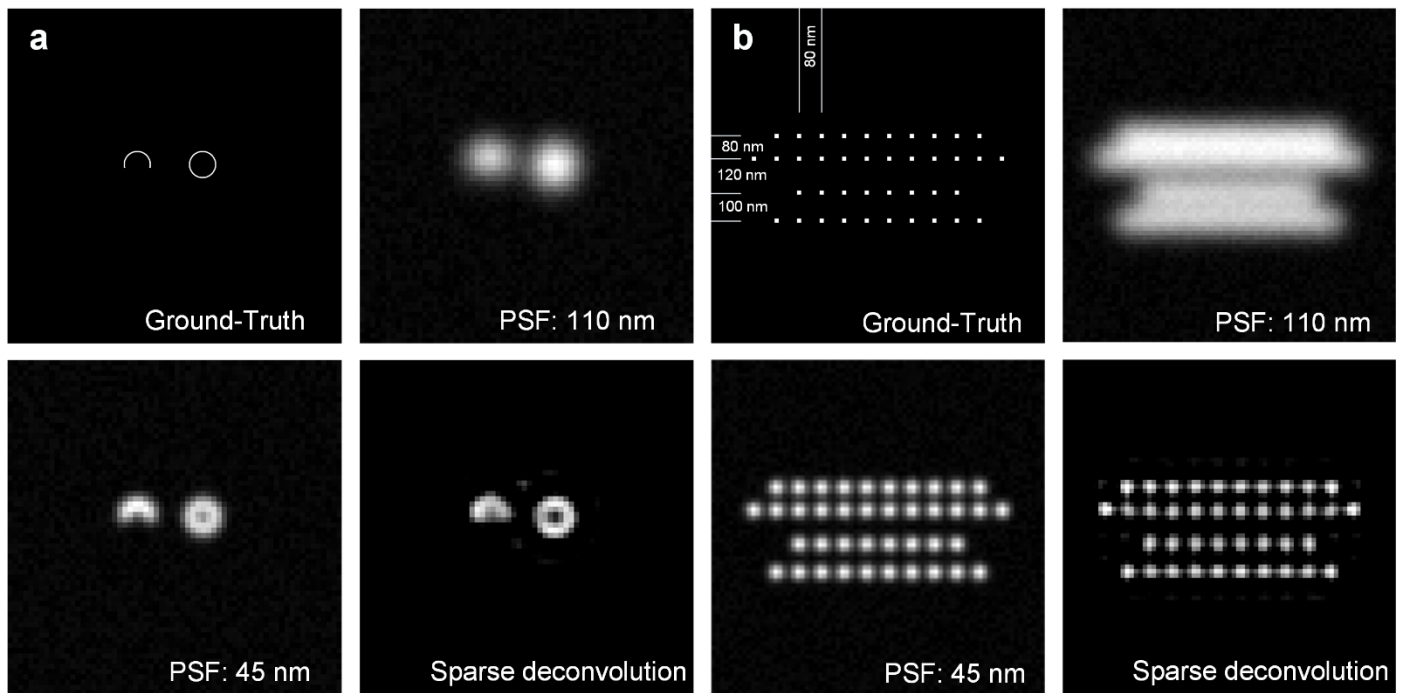

**Supplementary Fig. 6 | Partial ring/line simulation.** (a) We created synthetic partial (left) and complete (right) ring structures with an 80 nm diameter as ground-truth (top left). (b) We created four synthetic partial lines as ground-truth (top left). Each partial line consists of multiple narrowed placed dots with a distance of 80 nm. The ground-truth in **a** and **b** were convolved with PSF with FWHM of either 110 nm (top right) or 45 nm (bottom left), and such image was subsequently subsampled 16 times (pixel sizes of 16 nm), and corrupted with Poisson noise and 5% Gaussian noise. Images at the top right in **a** and **b** were sparse deconvolved (bottom right).

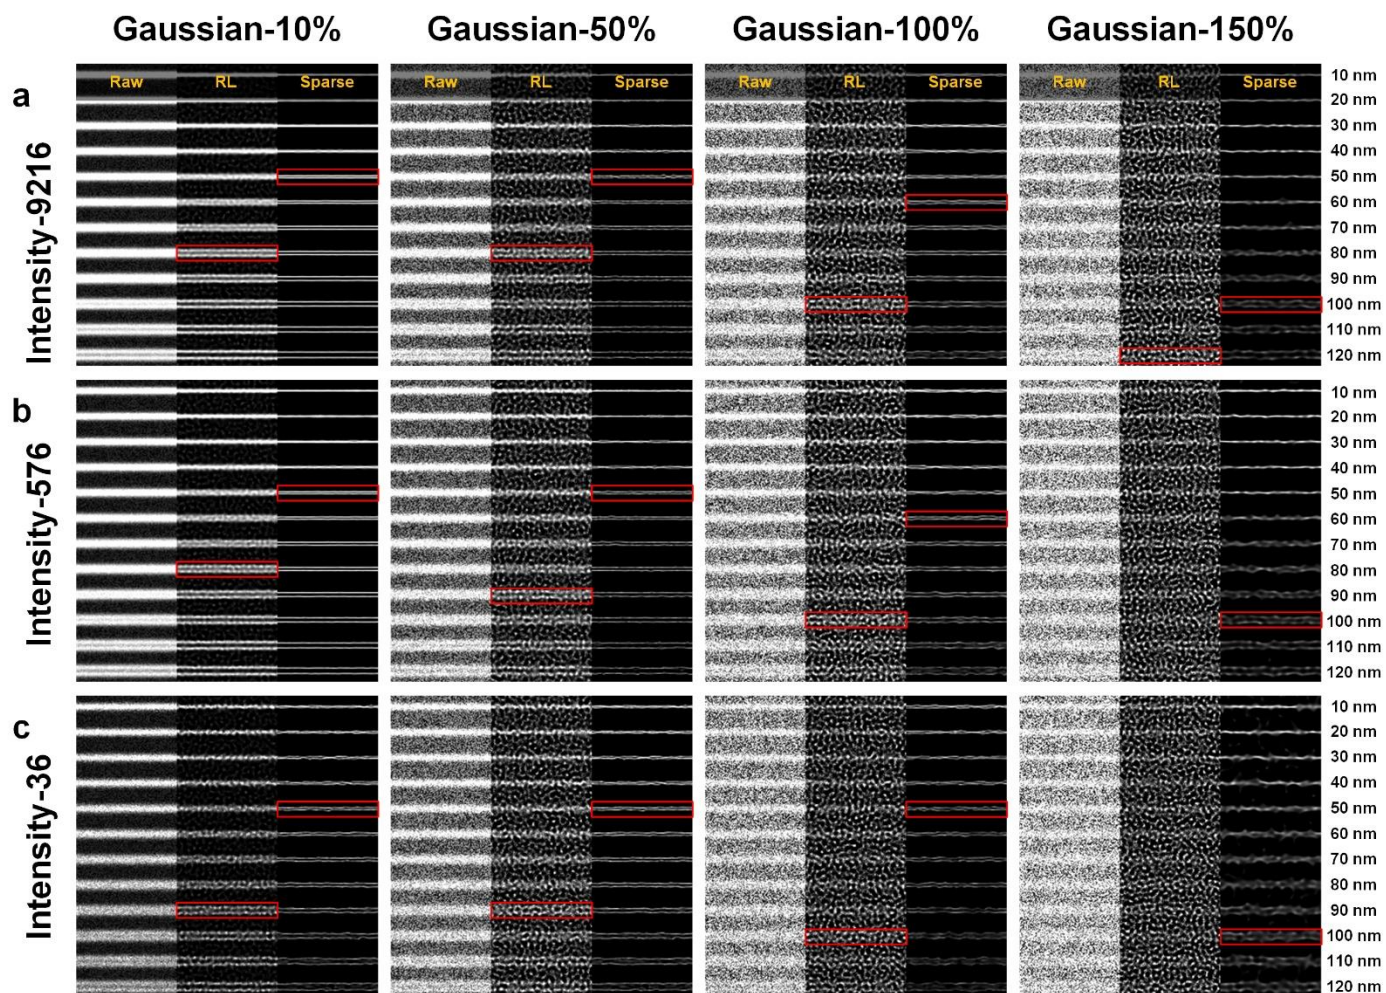

**Supplementary Fig. 7 | Effects of the combined Poisson-Gaussian noise on the paired lines resolved by the RL and Sparse deconvolution.** We synthesized a ground-truth image containing ten parallel paired lines departed by different distances (from 10 nm to 100 nm), and convoluted it with a 90 nm FWHM PSF. We set the maximum fluorescence intensities of lines to 9216 (a), 576 (b), and 36 (c) a.u., respectively, and added a Poisson-distributed noise plus 10% (first column), 50% (second column), 100% (third column), and 150% (fourth column) Gaussian distributed noise (compared to the maximum intensities of lines). After that, we deconvolved these raw images (left, labeled as 'Raw') with RL (middle, labeled as 'RL') or Sparse deconvolution (right, labeled as 'Sparse').

- Raw
- RL
- Sparse
- Discernment criterion

Description of LRQ

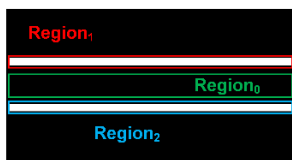

$$LRQ = 1 - \frac{2 \times Avg(Region_0)}{Avg(Region_1) + Avg(Region_2)}$$

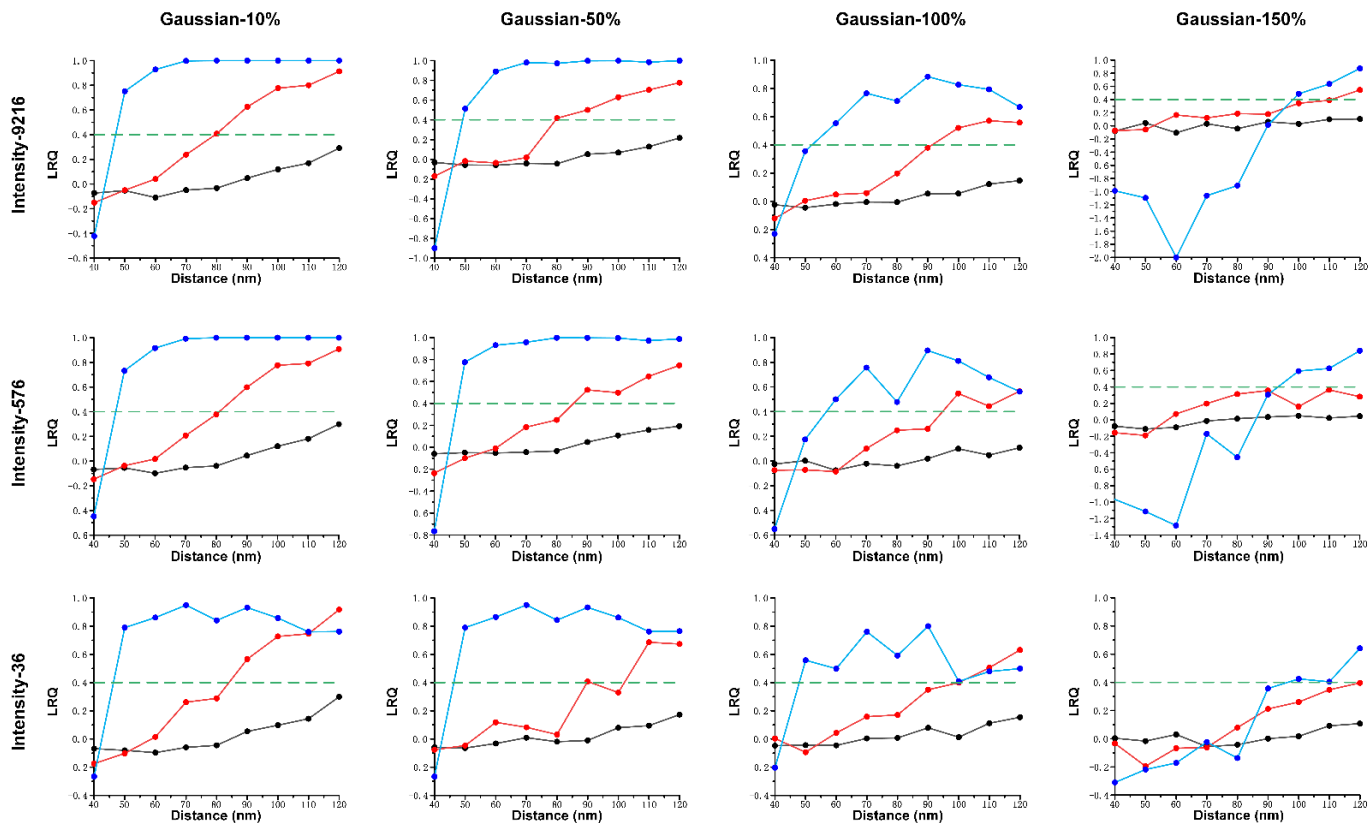

**Supplementary Fig. 8 | The line restoration quality (LRQ) values of images in Supplementary Fig. 7.** *Avg* represents the averaged intensity of the pixels in the corresponding region. We use the value 0.4 (green lines) as the threshold (discernment criterion) to determine whether the lines are separated successfully.



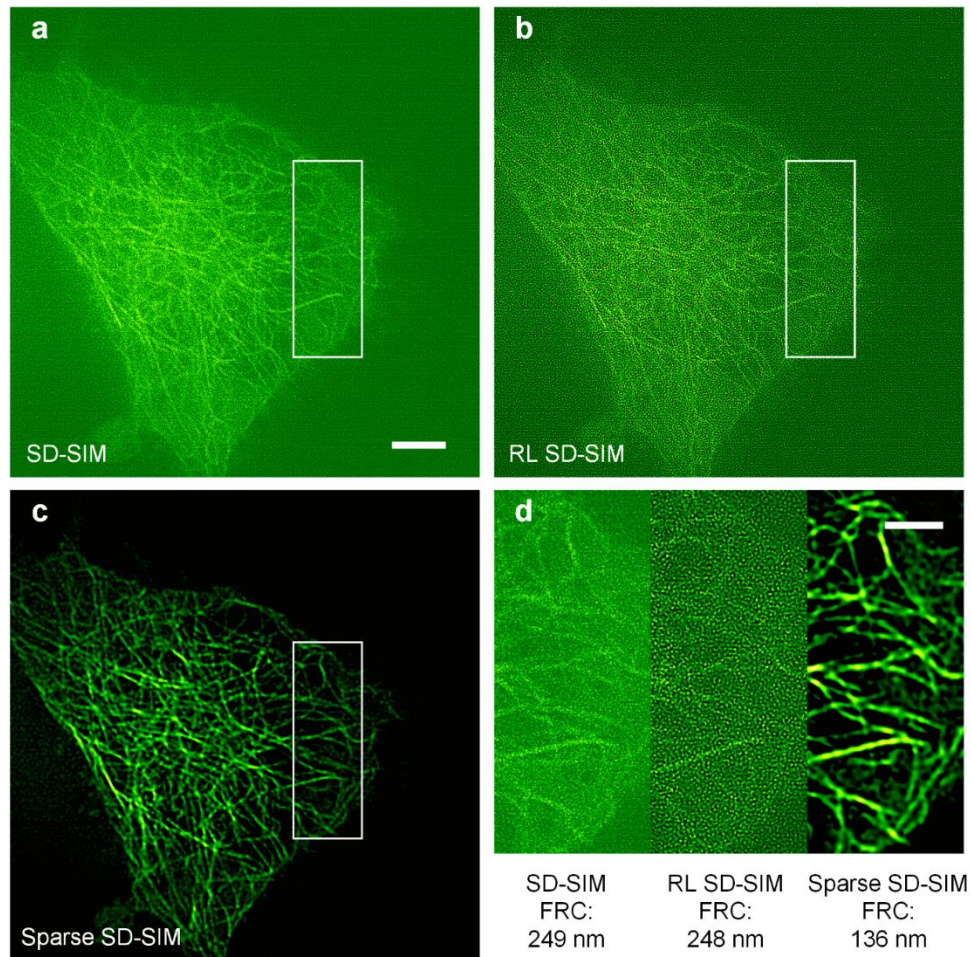

**Supplementary Fig. 9 | Sparse deconvolution increases the contrast of microtubules of low SNR captured by the SD-SIM.** (a-c) A live COS-7 cell labeled with Tubulin-EGFP captured by SD-SIM. The raw image was shown in (a), which was deconvolved by the RL (b) or Sparse deconvolution (c). (d) Magnified views of white boxes in (a-c). The FRC resolution of raw SD-SIM, RL SD-SIM, and Sparse SD-SIM were estimated to be 249 nm, 248 nm, and 136 nm, respectively. Scale bars: (a) 5  $\mu\text{m}$ ; (d) 3  $\mu\text{m}$ .

## Supplementary Note 6 | Parameters in the sparse deconvolution software.

In the **Supplementary Software** user interface (UI), we included thirteen parameters to adapt to different hardware environments, experimental conditions, and fluorescence microscopes (**Supplementary Fig. 10**). To simplify the usage of this software, we have classified them into three categories: *fixed parameters*, *image property parameters*, and *content-aware parameters*.

The system hardware determines *fixed parameters*, and the *image property parameters* are associated with image quality, such as high-or-low SNR and strong-or-weak background. Ten parameters in these two categories are selected based on the system and the image property and need little tuning. The three parameters left belong to *Content-aware parameters*. They need to be adjusted carefully to achieve the optimal reconstruction results. We introduced a four-step workflow to finetune these *content-aware parameters* (shown in **Supplementary Fig. 10** and **14**), which serves as a general guide. We provided the detailed step-by-step illustration in **Supplementary Note 8**.

### The parameters description:

#### *Fixed parameters:*

**Pixel size:** The physically equivalent pixel size of the final images.

**Wavelength:** The emission wavelength of the fluorescence probes.

**Effective numerical aperture:** Effective NA of the optical system based on its spatial resolution.

**3D imaging:** This is the option to choose whether the input images are volumetric or not.

**GPU acceleration:** This is the option to choose whether the calculation uses CUDA-GPU or not.

#### *Image property parameters:*

**Background (Step 0):** Based on the actual background fluorescence of the images processed, users can choose **no background** or the background under high-dose (*HI*) or low-dose of illumination (*LI*). Both the types *HI* and *LI* have *weak* and *strong* magnitude options. Thus five options of background are: *No*, *Weak-HI*, *Strong-HI*, *Weak-LI*, and *Strong-LI*. We want to emphasize that the **background estimation step** is an **optional operation** that may not be necessary. For example, when we processed  $\text{Ca}^{2+}$  imaging data in **Extended Data Fig. 17**, we selected **no** options to avoid removing the baseline signal. We have also provided parameters used for processing images in this manuscript for reference in **Supplementary Table 4**.

**Upsampling (Step 0):** In conditions of inadequate Nyquist sampling, we manually up-sample images to achieve the theoretical resolution increase posed by the sparse deconvolution. We usually choose the spatial upsampling method for **low-SNR** images and the Fourier upsampling method for **high-SNR** ones.

**t (z)-axial continuity (Step 1):** This parameter is for adjusting the continuity along the input dataset's *t* or *z*-

axis. We set the  $t(z)$ -axial continuity less than or equal to 1 to avoid temporal blurring. For the fast time-lapse imaging, while the fidelity is less than 100, the  $t(z)$ -axial continuity is usually assigned as one-hundredth of the fidelity. If the object being imaged has undergone fast movements, we need to set this parameter to a small number (0.1) or even zero to avoid causing motion artifacts.

**Sparse iteration times (Step 1):** Usually, we set it to 100 iterations. If spatial over-sampling is used, we need to increase the number to 200 or 300 to ensure the sparsity reconstruction convergence.

**Iterative deconvolution (Step 2):** We usually choose the Richardson-Lucy algorithm (RL) to deconvolve low-SNR images and the LandWeber deconvolution (LW) to deconvolve high-SNR ones.

### ***Content-aware parameters:***

**Image fidelity (Step 1):** This parameter denotes the distance between the image before and after the sparse reconstruction and is the inverse of the **xy continuity**. Usually, we use a large value (1000~300) for high SNR images.

**Sparsity (Step 1):** This parameter represents the relative sparsity constraint enforced on the reconstruction (Step 1). Usually, we pre-set this value to **one-tenth** of the image fidelity term (Supplementary Fig. 5). However, an unnecessary high sparsity value may remove weak signals. Thus we need to finetune this parameter back-and-forth based on the final deconvolution result.

**Iterative deconvolution times (Step 2):** This parameter sets the times for the post iteration deconvolution. Because the LW method is slower than the vector extrapolation version of the RL method in reaching convergence, we choose 5~15 iteration times for the RL algorithm and 30~50 for the LW algorithm.

### ***Key messages:***

The ten parameters in the first two categories are primarily determined by the optical system and image property and need little tuning. Only the three content-aware parameters need to be adjusted back-and-forth carefully by visual examination of the reconstruction results.

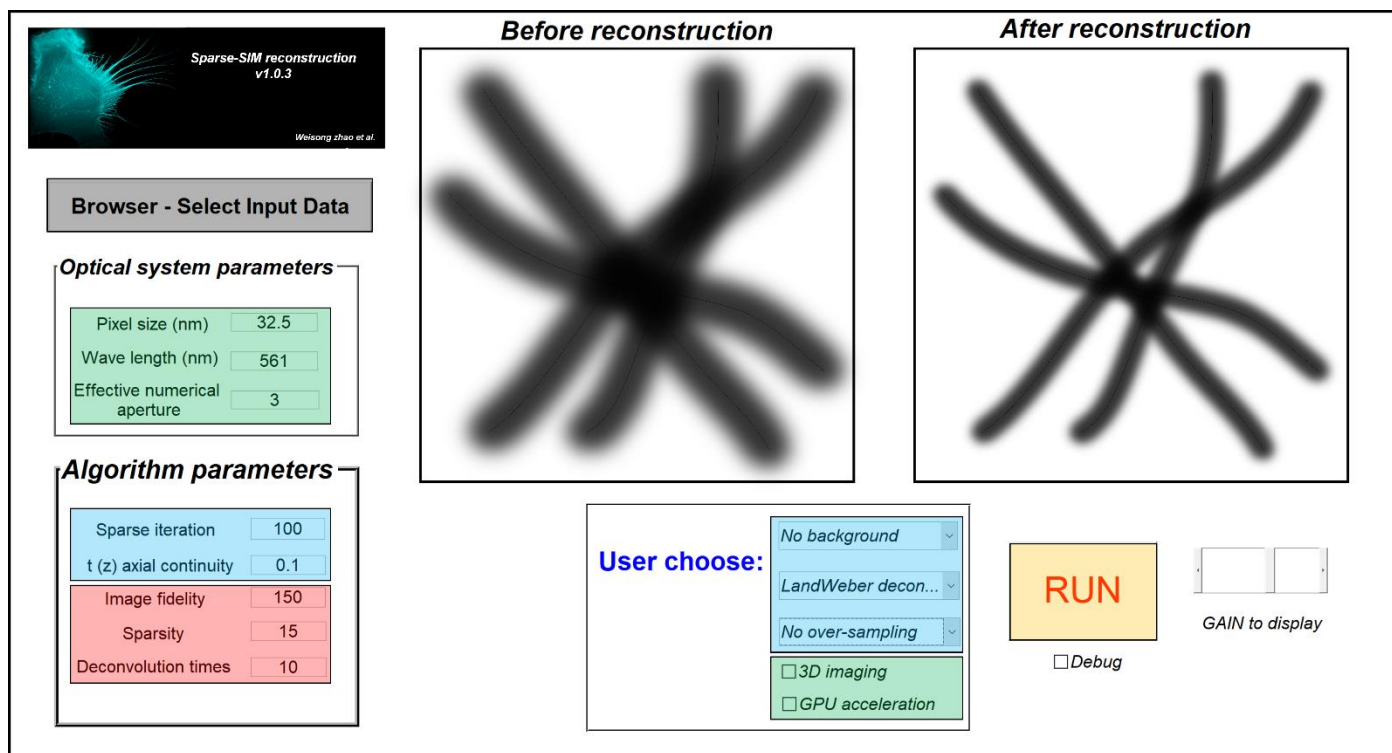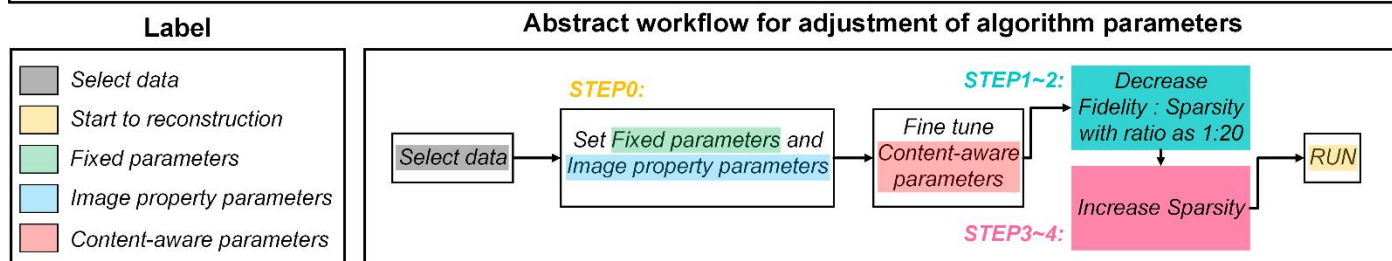

**Supplementary Fig. 10 | The sparse deconvolution software.** The top panel shows the software UI, and the bottom panel shows the simplified workflow of parameters adjustment. The detailed workflow is shown in Supplementary Fig. 14.



## Supplementary Note 7 | Optimal values of the sparsity and the fidelity under different conditions.

Among content-aware parameters, we usually set the iterative deconvolution time as a constant of 10, 50 for the RL, LW deconvolution method, respectively. As we used the fidelity term ( $1/\text{continuity}$ ) to adjust the weight of continuity in the software, we only need to finetune the sparsity and the fidelity parameters in practice.

By collecting all fidelity and sparsity values carefully chosen for images used in this work, we find that the sparsity value roughly follows a linear relationship with the fidelity one (1:5~1:20, **Supplementary Fig. 11-13**). Although we do not understand the underlying mechanism, it represents the suitable range for processing different image datasets.

Because we want to improve the resolution in deconvolving high SNR images and the contrast in deconvolving low SNR images, these two parameters needed to be adjusted carefully. To explore the effects of different sparsity and fidelity values on reconstruction results, we synthesized ring-shaped and punctated structures of 80 nm in diameters, convoluted them with a PSF of 110 nm in full width at half maximum (FWHM) (**Supplementary Fig. 12a**), and corrupted them with the noise of various amplitudes (**Supplementary Fig. 12b**). With 2% noise, sparse deconvolution resolved both the ring-shaped and the punctuated structures with high fidelity and sparsity values, which approximately followed a 5:1 relationship (1000:200, 950:200, 400:80). However, at low fidelity numbers (smaller or equal to 100), the fluorescent ring was not resolved, indicating the failure to improve resolution (**Supplementary Fig. 12d**). With 10% noise, the ring became irregular using the fidelity: sparsity ratio of 1000:200 or 950:200, while a balance of 400:80 was optimal for the resolution enhancement. As the SNR of the image deteriorated, it was evident that large fidelity and sparsity values led to artifacts, while small numbers were better for the extraction of real structures from noise. Under 80% noise, a fidelity: sparsity ratio of 20:5 allowed the ring to be resolved with sharp edges. With 100% noise, we could only use small fidelity and sparsity values such as 10 and 2 to avoid artifacts. Despite the failure to improve resolution, we observed reduced background and much-improved contrast, which may help subsequent visualization, segmentation, tracking, and analysis.

Because the ground-truth for this synthetic image was known, we systematically examined different peak signal-to-noise ratios (PSNRs) obtained under different sets of fidelity and sparsity values (**Supplementary Fig. 13a**). If we selectively highlighted regions of PSNR larger than 25 (or 22.6 at 100% noise), the weight of fidelity linearly correlated with that of the sparsity within a narrow range at most noise levels (**Supplementary**

505 **Fig. 13b).** These data reinforce the roughly linear relationship between optimal choices of the fidelity and  
 506 sparsity values.

507

508 **Key messages:**

- 509 1) We only need to adjust the values of fidelity and sparsity carefully.
- 510 2) The optimal values of fidelity and sparsity follow an approximately linear relationship.
- 511 3) Images of high SNR afford large fidelity values, while low SNR images require small fidelity values.

512

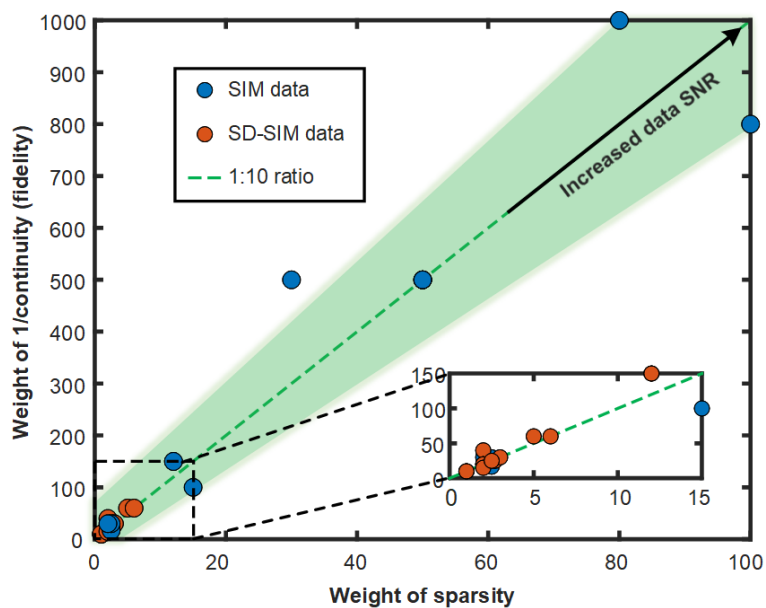

513

514 **Supplementary Fig. 11 | Linear relationship between optimal values of sparsity and fidelity.** We have  
 515 identified an approximately linear relationship of sparsity and fidelity (~1:5~1:20) from the reconstruction  
 516 results of SIM (blue) and SD-SIM (orange) in this work.

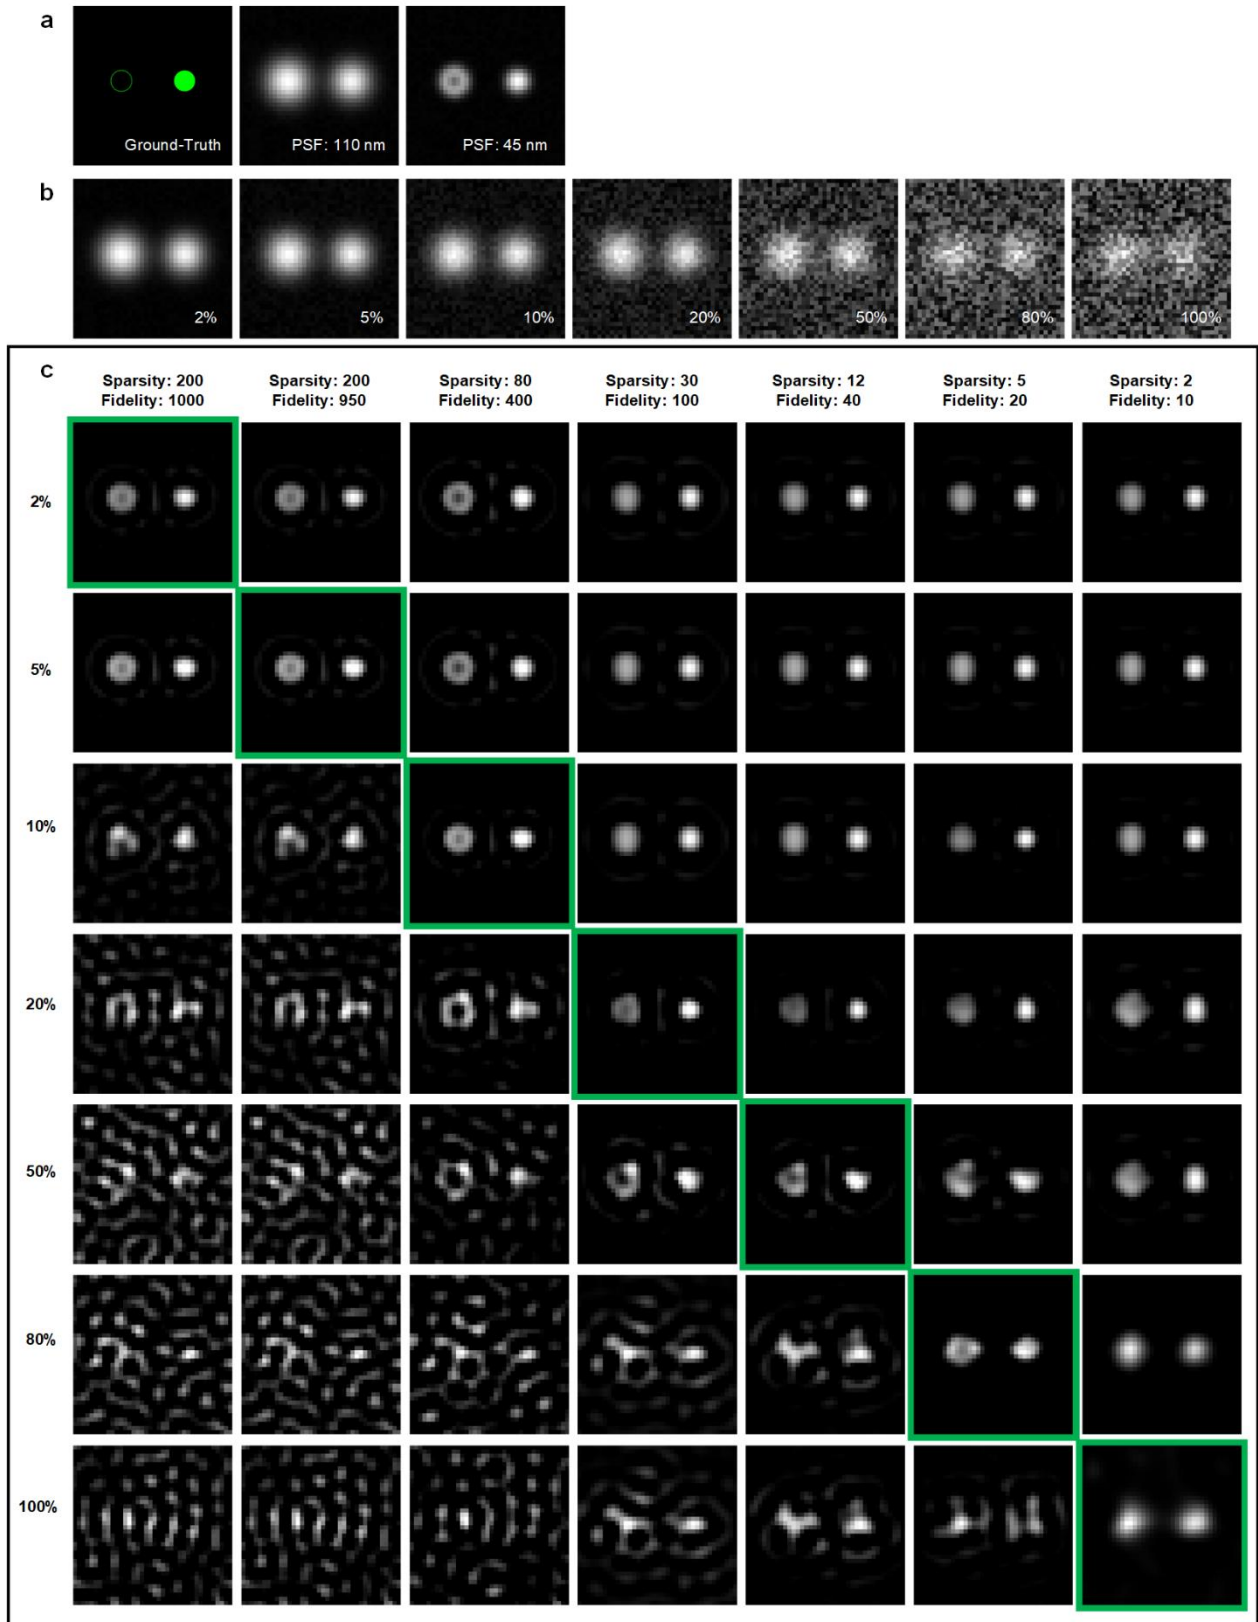

**Supplementary Fig. 12 | Exploring optimal fidelity and sparsity choices for reconstructions of various SNR images.** (a) We synthesized ring-shaped and punctuated structures of 80 nm in diameter as the ground-truth (left), convoluted them with a PSF of either 110 nm (middle) or 45 nm (right) in FWHM. (b) The image in the middle of (a) was subsequently subsampled 16 times (pixel sizes of 16 nm), and corrupted with Poisson noise plus 2%, 5%, 10%, 20%, 50%, 80%, and 100% Gaussian noise. (c) The  $7 \times 7$  table of the reconstruction results. The column and row represent the noise amplitude and values of priors for the reconstruction, respectively.

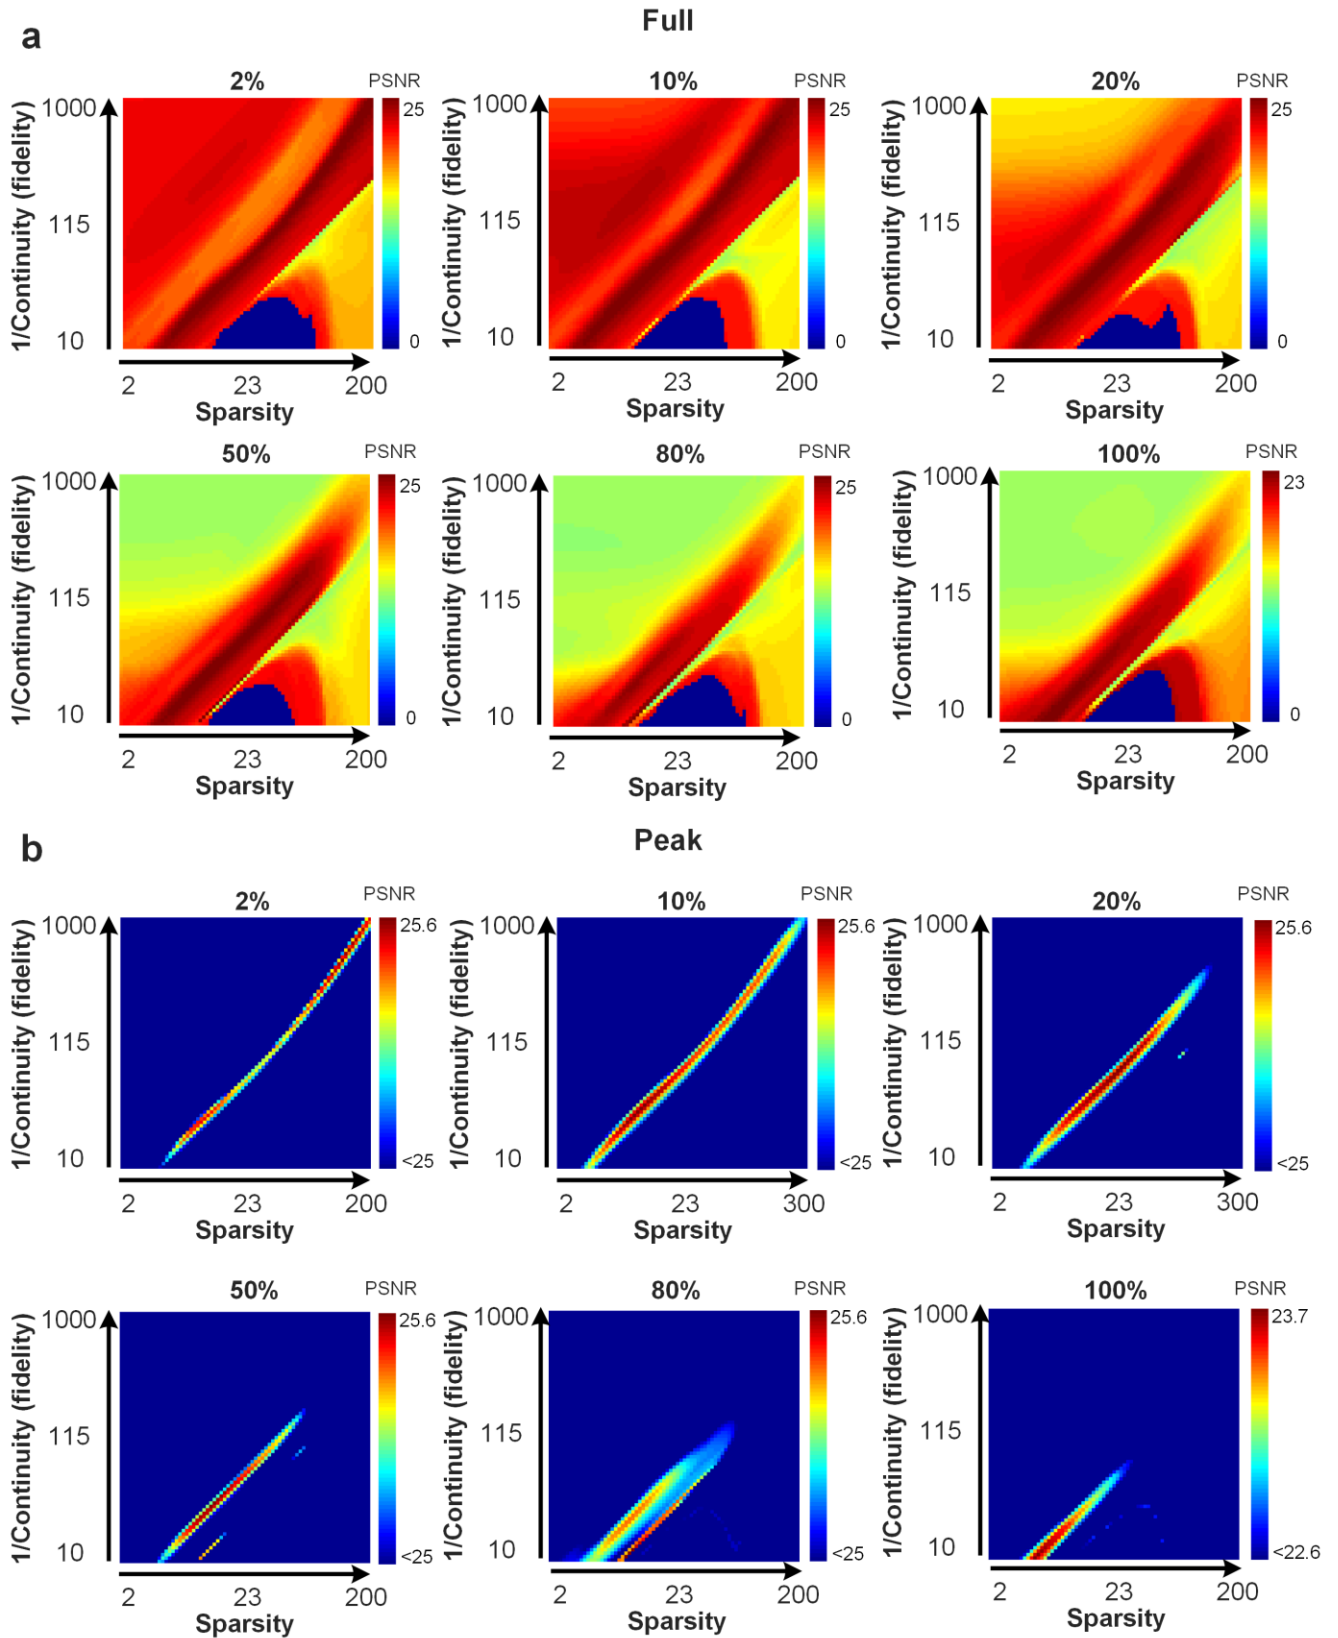

**Supplementary Fig. 13 | PSNR heat maps at different values of sparsity and fidelity. (a)** The maps of the PSNR values (*c.f.*, images under different noise amplitudes in **Supplementary Fig. 12**) at different values of sparsity (row) and fidelity (column). **(b)** PSNR maps in **(a)** with values greater than 25 (2%, 5%, 10%, 20%, 50%, and 80% noise) or 22.6 (100% noise) at different conditions.

## Supplementary Note 8 | Parameters finetuning

In this note, we intend to provide a comprehensive guide for the readers/users to process their data, including the detailed procedures to adjust the *Fidelity* and *Sparsity* values (Supplementary Note 8.1) and some step-by-step examples (Supplementary Note 8.2).

### Supplementary Note 8.1 | Procedures for parameters finetuning.

**STEP 0.** Set the *Fixed parameters* and *Image property parameters* according to the microscope hardware, computing system, and properties of images collected as described in Supplementary Note 6.

**STEP 1.** Choose the initial *Fidelity* value according to the image SNR. We recommend starting from 1000 for high SNR images or 500 for low SNR ones. For starters, we also recommend choosing the *Sparsity* as one-twentieth of the *Fidelity*, which is to avoid over-filtering artifacts due to the inappropriately high *Sparsity* value.

**STEP2.** Adjust the *Fidelity* and *Sparsity* downwards simultaneously with the ratio maintained. Because the *Fidelity* is the opposite of the *xy continuity* term, its reduction constrains the reconstruction with more weight on the continuity. However, unnecessary small *Fidelity* values may over-smooth the structures and reduce the resolution. Therefore, we need to examine the reconstruction results and terminate the downwards adjustment once image over-smoothing is apparent.

**STEP 3.** Fine-tune *Sparsity* upwards. Large *Sparsity* values help us recover the high-frequency information on the one hand but also may over-filter the weak signals on the other hand. Therefore, we increase the weight of *Sparsity* until over-filtering artifacts emerge. Please note that adjusting the *Sparsity* value changes the ratio of *Fidelity* and *Sparsity*.

**STEP 4.** Stop at the value of *Sparsity* with the right balance of resolution and minimally removing weak fluorescence signals.

### Supplementary Note 8.2 | Step-by-step examples.

Here, we provided two simulation examples and four experimental examples from imaging systems of 2D-SIM (*c.f.*, Fig. 4a), TIRF-SIM (*c.f.*, Fig. 4j), and SD-SIM (*c.f.*, Extended Data Fig. 15) microscopes, respectively, to illustrate the four-step parameters adjustments procedure in practice.

#### Examples for the finetuning of the *Fidelity* and *Sparsity* values

**Example 1.** *Sparse deconvolution of synthetic ring-shaped and punctuated structures corrupted with noise of different amplitudes* (Supplementary Fig. 15)

559 **5% noise condition.**

560 1) For synthetic ring-shaped and punctuated structures corrupted with 5% noise, we selected the *Fidelity* and

561 *Sparsity* as 1000 and 50 as recommended.

562 2) Reducing the *Fidelity* from 1000 to 800 and maintaining the *Fidelity:Sparsity* ratio did not significantly

563 change image quality. Therefore, we stopped the *Fidelity* at 1000.

564 3) Next, we increased the *Sparsity* while keeping the *Fidelity* stable. Once we raised the *Sparsity* to 150, the

565 ring-shaped structure emerged. However, when the *Sparsity* was adjusted to 250, the ring-shaped structure

566 became interrupted. Therefore, we selected 1000 and 200 as the optimal values for the *Fidelity* and

567 *Sparsity* for this image with low noise.

568 **80% noise condition.**

569 1) For synthetic ring-shaped and punctuated structures corrupted with 80% noise, we selected the *Fidelity*

570 and *Sparsity* as 500 and 50 as recommended.

571 2) At this ratio, irregularly sharpened structures were apparent. Therefore, we reduced the *Fidelity* while

572 maintaining the *Fidelity:Sparsity* ratio to suppress artifacts. The contrast of two fluorescence puncta

573 increased at the 20:1 ratio, while reducing the *Fidelity* to an even smaller value did not improve further.

574 3) Thus we fixed the *Fidelity* to 20, and increased the *Sparsity* term. Once we raised the *Sparsity* to 6, the

575 ring-shaped structure emerged, and even larger *Sparsity* led to over-sharpening artifacts. Therefore, we

576 stopped at 20 and 6 as the optimal values for the *Fidelity* and *Sparsity* for this image with high noise.

577 **Example 2. Sparse deconvolution of dense actin filaments obtained by the 2D-SIM (Supplementary Fig.**

578 **16)**

579 1) For dense actin structures under the 2D-SIM, we selected the *Fidelity* and the *Sparsity* as 1000 and 50 as

580 recommended. With these parameters, actin filaments were intermittent, and the snowflake-like artifacts

581 emerged. Therefore, we needed to reduce the *Fidelity* (increase the continuity) to reduce artifacts caused

582 by noise amplification.

583 2) We started with a large searching step for the general evaluation to enable rapid convergence and then

584 gradually reduced the step size for fine adjustment. By decreasing the *Fidelity* (from 1000 to 150) and

585 maintaining the *Fidelity:Sparsity* ratio, the snowflake-like artifacts were suppressed at the price of reduced

586 resolution. When we selected 150 and 7 for the *Fidelity* and *Sparsity*, respectively, actin filaments were

587 relatively continuous without much blurring.

588 3) Next, we kept the *Fidelity* to 150 and increased the *Sparsity* to further improve the resolution and contrast.

Once we selected a *Sparsity* value larger than 10, some weak actin filaments were trimmed off. Therefore, we set the *Fidelity* value of 150 and the *Sparsity* value of 10.

**Example 3. Sparse deconvolution of the caveolae obtained by the TIRF-SIM (Supplementary Fig. 17)**

- 1) For caveolae under the TIRF-SIM, we selected the *Fidelity* and *Sparsity* as 1000 and 50 as recommended. Interestingly, when we concomitantly reduced the *Fidelity* and the *Sparsity* values, the ring-shaped caveolae were blurred. Thus we stopped the *Fidelity* value at 1000.
- 2) Next, we kept the *Fidelity* to 1000 and increased the *Sparsity* to further improve the resolution and contrast. As we increased the *Sparsity* value, ring-shaped structures became more apparent. On the other hand, once we selected a *Sparsity* value of 130, the caveolae ring became interrupted. Therefore, we stopped the *Sparsity* value at 90 for optimal extraction of high-frequency caveolae structures.

**Example 4. Sparse deconvolution of the actin filaments obtained by the SD-SIM (Supplementary Fig. 18)**

- 1) Live-cell images obtained by our SD-SIM configurations (Supplementary Table 3) were usually of low SNR. Therefore, we set the values of the *Fidelity* and *Sparsity* as 500 and 25, respectively.
- 2) At the initial recommended values of the *Fidelity* and *Sparsity*, actin filaments were intermittent and corrupted with snowflake-like artifacts. By decreasing the *Fidelity* and maintaining the *Fidelity: Sparsity* ratio, the snowflake-like artifacts were suppressed. When we selected 40 and 2 for the *Fidelity* and *Sparsity*, respectively, actin filaments were relatively continuous without much blurring.
- 3) Next, we kept the *Fidelity* to 40 and increased the *Sparsity* to further improve the resolution and contrast. However, once we increased the *Sparsity* value, some weak actin filaments were trimmed off. Therefore, we set the optimal *Fidelity* and *Sparsity* values to 40 and 2.

**Example 5. Sparse deconvolution of the CCPs obtained by the SD-SIM**

- 1) For CCPs labeled by clathrin-DsRed and observed under the SD-SIM (*c.f.*, Extended Data Fig. 15), we needed to select the *Strong background (HI)* to remove the cytosol signal before sparse deconvolution (Supplementary Fig. 19). It was apparent that our background estimation method was able to remove different amplitudes of background fluorescence from different regions.
- 2) Upon selecting the *Fidelity* and *Sparsity* as 500 and 25, ring-shaped CCPs were oversharpened and brightening single pixels (Supplementary Fig. 20). As we reduced the *Fidelity* and *Sparsity* concomitantly, artifacts disappeared along with the blurring of rings. We selected 60 and 3 for the *Fidelity* and *Sparsity* without unnecessary blurring.
- 3) Next, we kept the *Fidelity* to 60 and increased the *Sparsity* to improve the resolution and contrast further.

We stop at the optimal *Fidelity* and *Sparsity* values of 60 and 5, which reached a good balance between resolving intricate signals and maintaining weak signals.

### **Supplementary Note 8.3 | More explanations on the background estimation**

To demonstrate the effects of different background estimation choices, we chose cytosolic lysosomes from **Fig. 4m** as the example. Upon selecting either *No background*, *Weak-HI*, or *Strong-HI*, it was apparent that the vesicular structure remained largely unchanged while the signal-to-background ratio increased substantially (**Supplementary Fig. 21a**).

Weakly fluorescent lysosomes at the upper left corner of the FOV, which was most likely due to the microscope's uneven illumination, might be removed by selecting the *Strong-HI* parameter (**Supplementary Fig. 21b**). Therefore, we could use the BaSiC correction<sup>37</sup> method to correct the skewed intensity distribution in the FOV so that obscure lysosomes with low intensities emerged in the image before the deconvolution (**Supplementary Fig. 21c**). Subsequent sparse deconvolution revealed multiple lysosomes with the resolution and contrast similar to lysosomes in the middle of the FOV (**Supplementary Fig. 21d**).

Finally, we also showed the effects of different background estimation choices on dense actin filaments revealed by the sparse deconvolution (**Supplementary Fig. 22**). Choosing either *Weak-HI* or *Strong-HI* removed the background without much affecting fluorescence profiles of filaments.



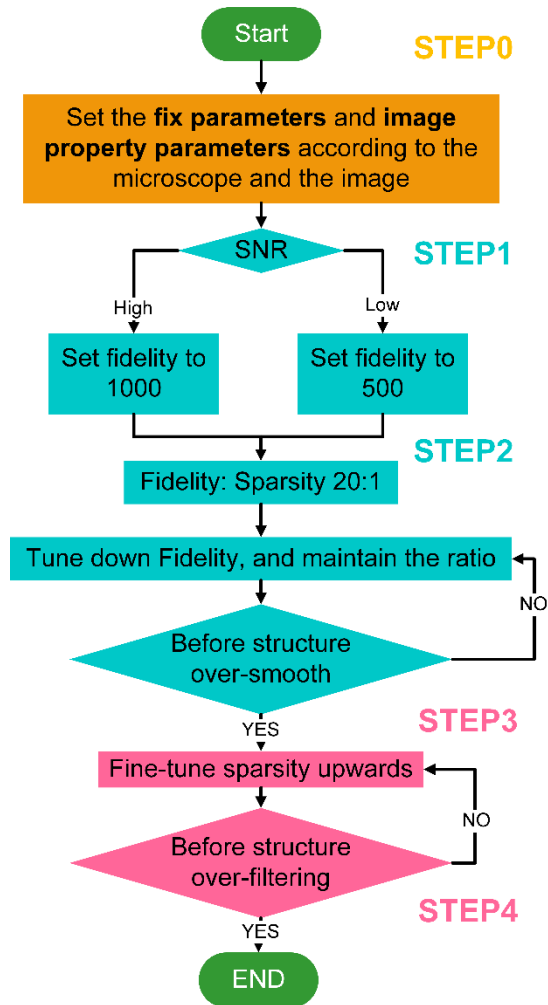

**Supplementary Fig. 14 | The complete workflow of adjusting parameters in the sparse deconvolution software in handling various fluorescence images.**

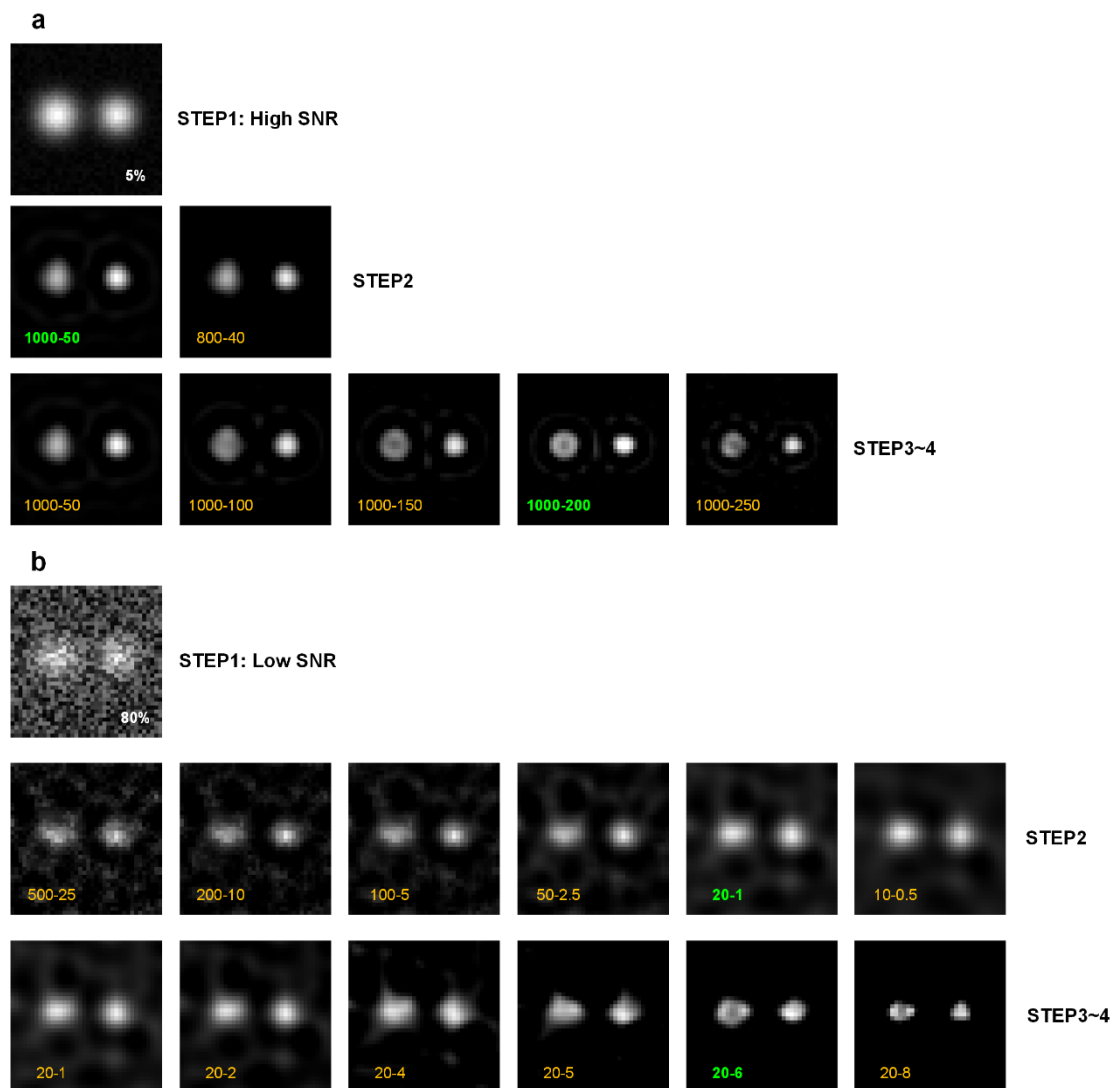

**Supplementary Fig. 15 | The process of selecting optimal parameters for the sparse deconvolution of synthetic ring-shaped and punctuated structures corrupted with small (a) or large (b) noise (*c.f.*, Supplementary Fig. 12).**

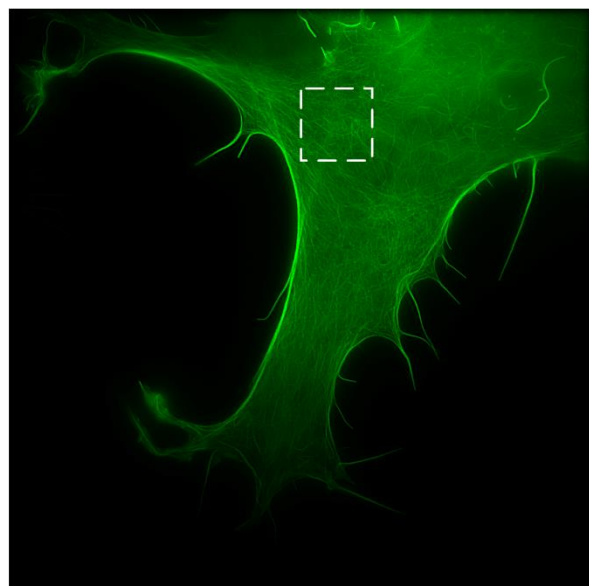

2D-SIM  
LifeAct-EGFP (*c.f.*, **Fig. 4a**)  
No background

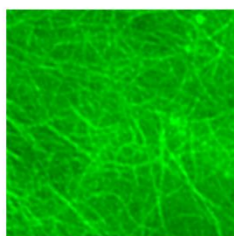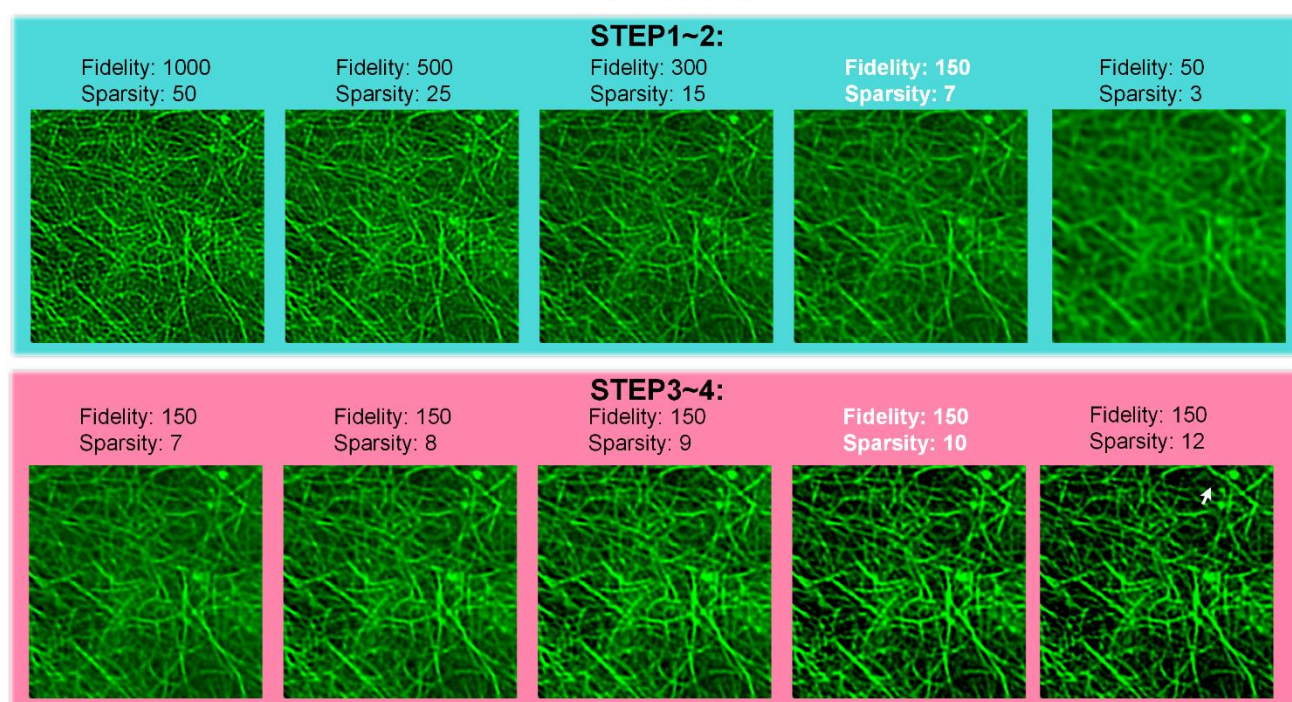

**Supplementary Fig. 16 | The process of selecting optimal parameters for the sparse deconvolution of actin filaments obtained by the 2D-SIM.**

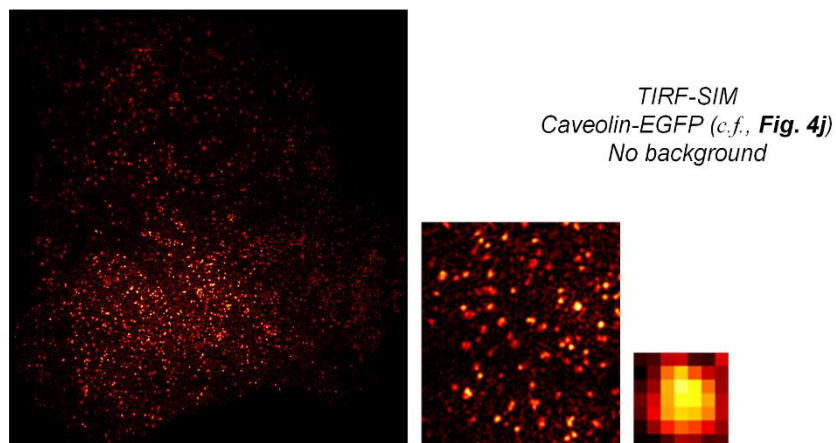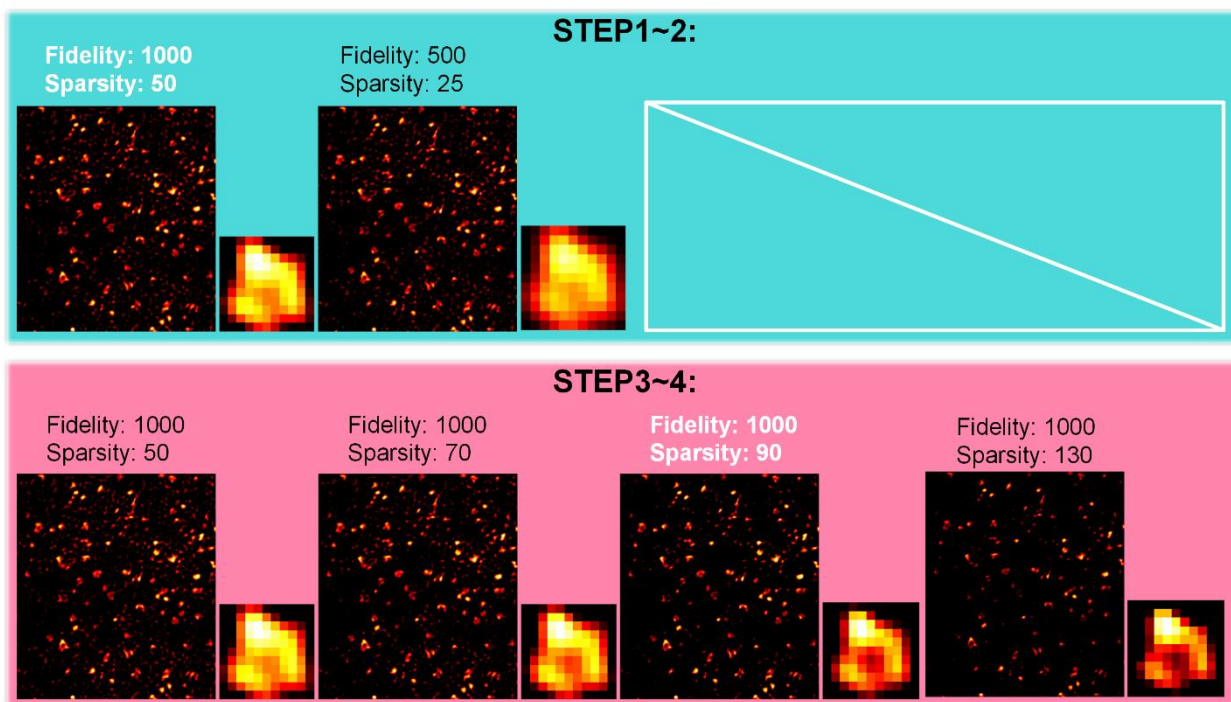

**Supplementary Fig. 17 | The process of selecting optimal parameters for the sparse deconvolution of caveolae obtained by the TIRF-SIM.**



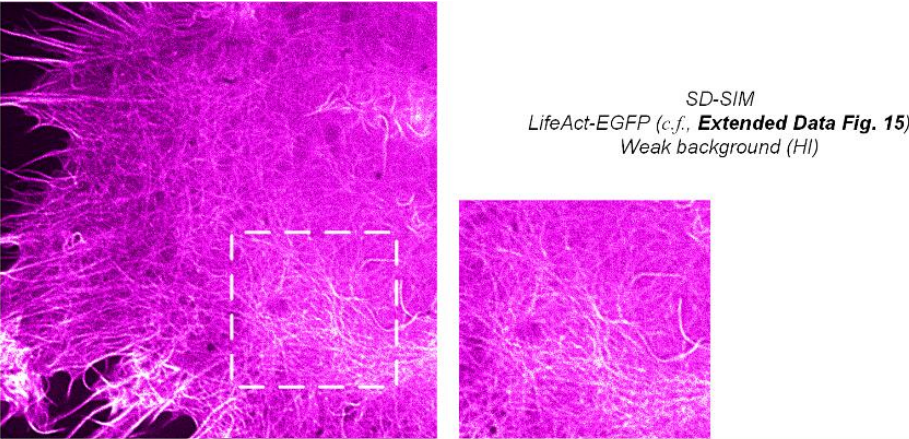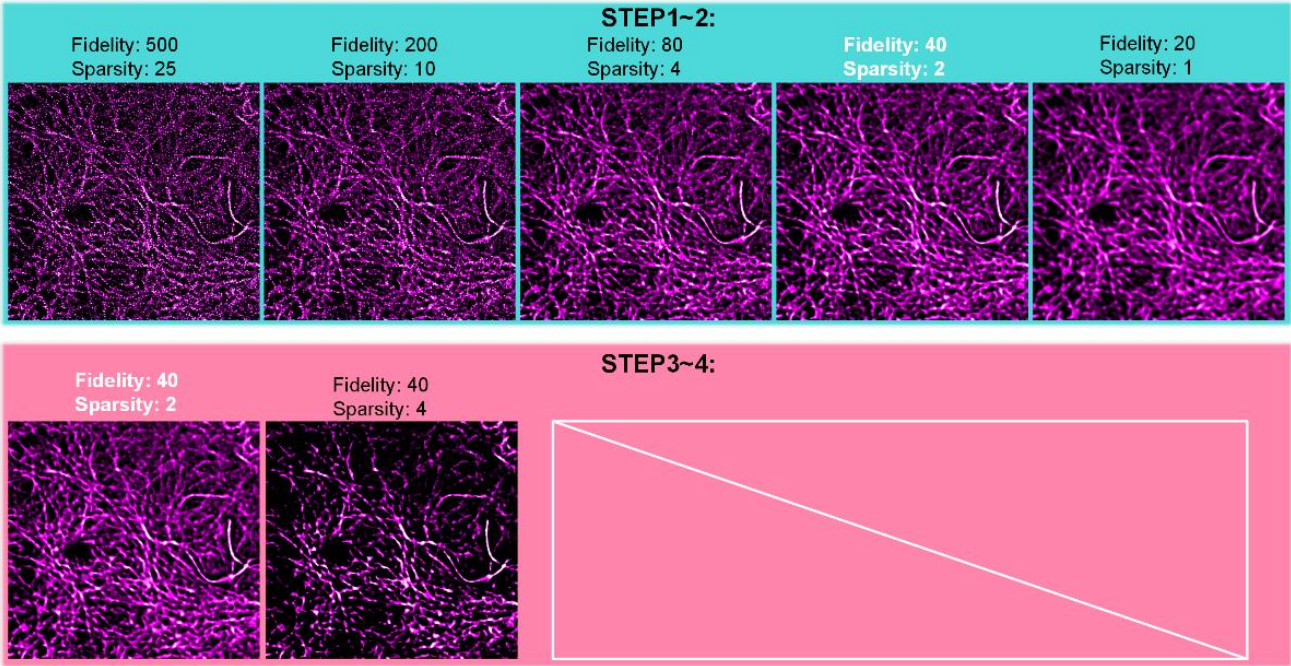

Supplementary Fig. 18 | The process of selecting optimal parameters for the sparse deconvolution of actin filaments obtained by the SD-SIM.

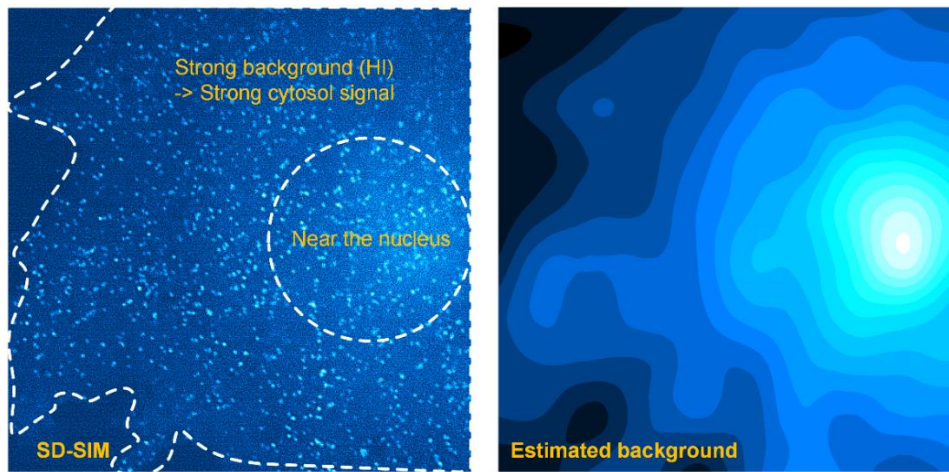

**Supplementary Fig. 19 | Estimating background of different amplitudes at different regions.** The raw SD-SIM image (left) and the estimated background by using the *Strong-HI* parameter (right).

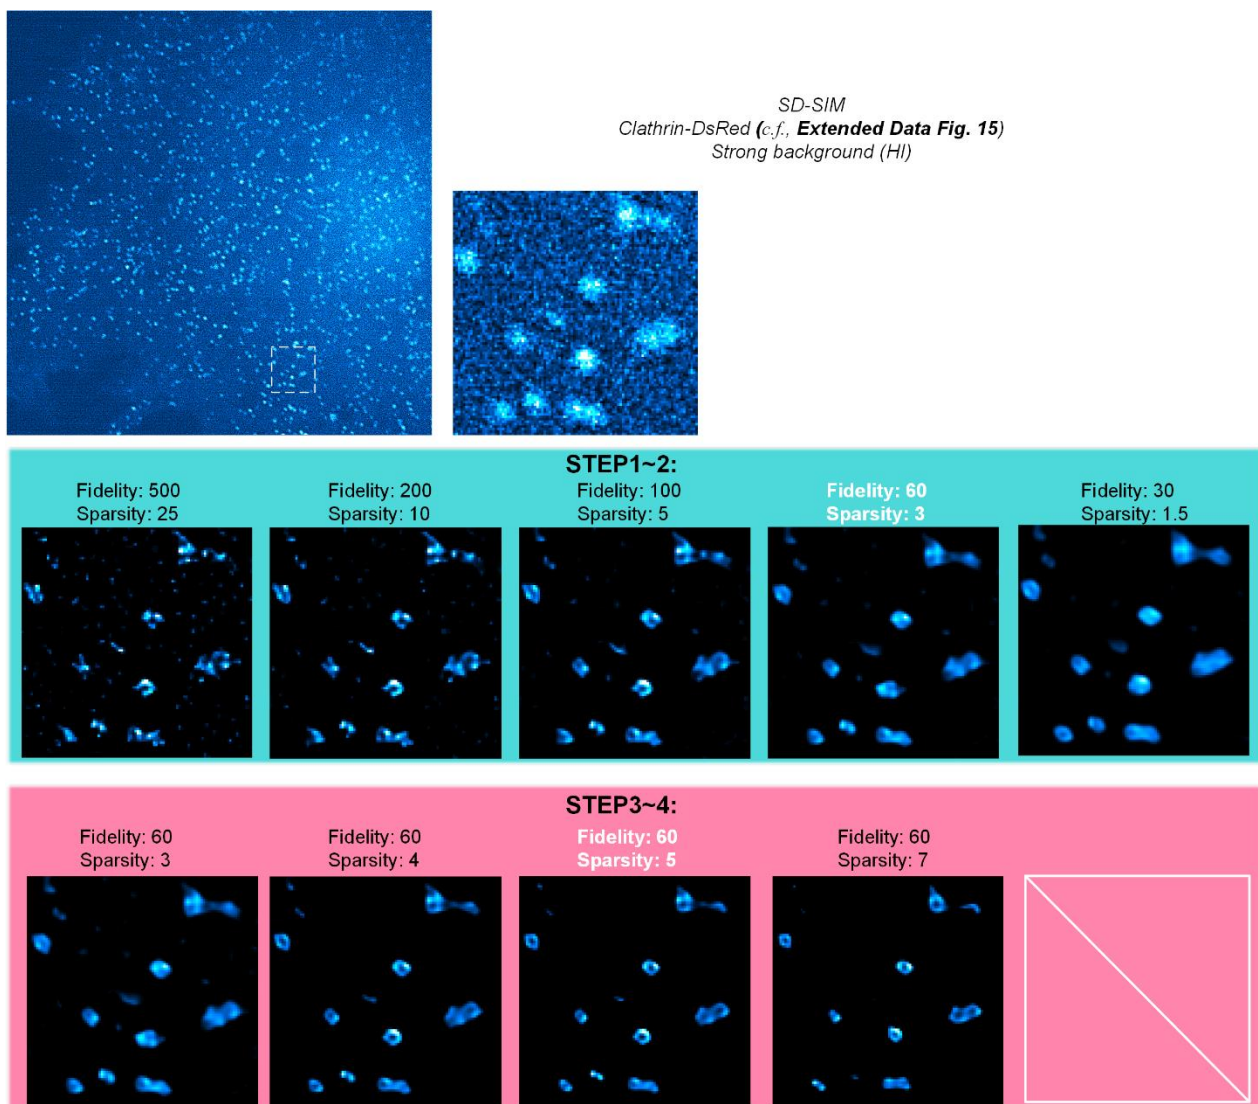

**Supplementary Fig. 20 | The subsequent process of selecting optimal parameters for the sparse deconvolution of CCPs obtained by the SD-SIM.**



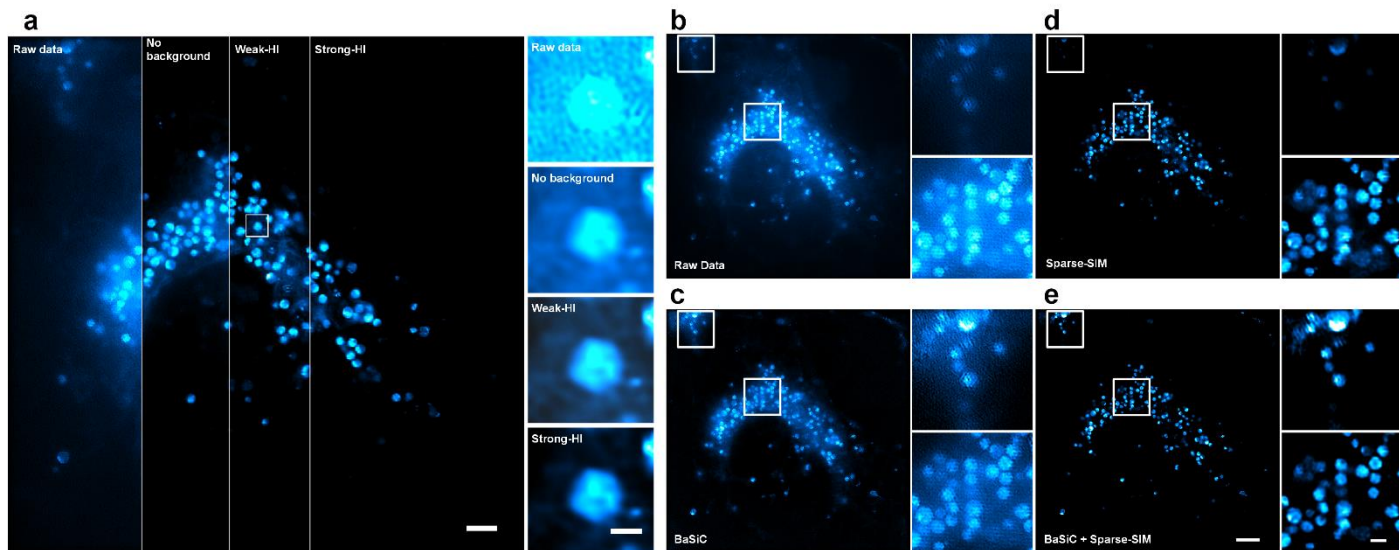

**Supplementary Fig. 21 | Images reconstructed with different background estimations and the effect of the BaSiC correction.** (a) The 2D-SIM image (*c.f.*, Fig. 4m) after reconstructed with *No background*, *Weak-HI*, or *Strong-HI*. Scale bars: left, 3  $\mu\text{m}$ ; right, 500 nm. (b, c) The 2D-SIM image (*c.f.*, Fig. 4m) before (b) and after (c) BaSiC illumination correction. (d, e) The sparse deconvolution results of (b) and (c). Scale bars: (a) left, 3  $\mu\text{m}$ ; right, 500 nm; (e) left, 5  $\mu\text{m}$ ; right, 1  $\mu\text{m}$ .

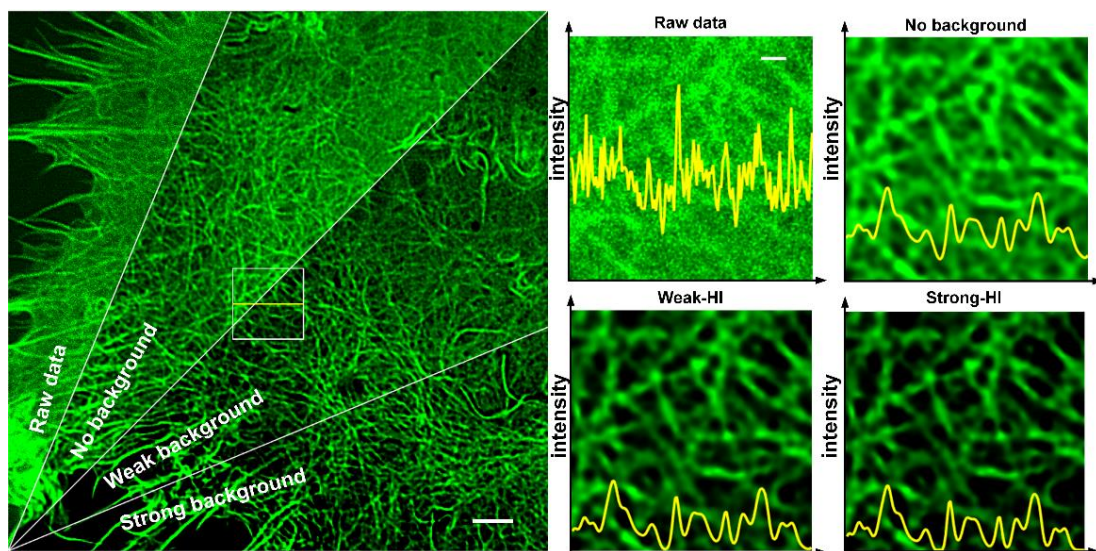

**Supplementary Fig. 22 | Actin filaments reconstructed with different background estimations (*c.f.*, Extended Data Fig. 15).** Scale bars: left, 3  $\mu\text{m}$ ; right, 500 nm.

## Supplementary Note 9 | The calibration of nuclear pore diameters and the FWHM resolution of Sparse SD-SIM.

Unexpectedly, we found that when the sizes of system PSF and the size of camera pixel were comparable to the size of the structure been imaged, fitted diameters of punctated and ring-shaped structures differently deviated from their real values. For large punctated fluorescence beads, the fitted FWHMs were larger than the PSF of the microscope. For ring-shaped pores under the Sparse-SIM, their fitted diameters were smaller than their real values. Therefore, we used simulations to derive correction factors under different situations.

### Supplementary Note 9.1 | Calibrating fitted diameters of ring-shaped pores.

To examine the relationship between fitting diameter and the real diameter, we created synthetic ring structures (1 nm sampling) with different diameters (60, 70, 80, 90, 100, 110, 120 nm). These ground truth structures are then convolved with different sized PSF (10, 20, 30, 40, 50 nm  $FWHM_{PSF}$ ). The results are subsampled by 16 times to match the experimental condition (**Supplementary Fig. 23a**). Resultant images are fitted with a double-peak Gaussian function to extract the fitted diameters (**Supplementary Fig. 23a**). As can be seen in **Supplementary Fig. 23b**, with 1 nm pixel size and no subsampling, the fitted diameter ( $FD$ ) was smaller than the real diameter ( $RD$ ) due to the convolution of system PSF ( $FWHM_{PSF}$ ) with the ring, which could be approximated by the equation:

$$RD = \sqrt{FD^2 + FWHM_{PSF}^2} . \quad (22)$$

Interestingly, if the pixel was subsampled to be 16 nm per pixel, the apparent  $FD$  was further reduced by the aliasing effect of a large pixel. Under such circumstance, the relationship between  $FD$  and  $RD$  could be approximated by a linear function:

$$RD = a \times FD + b . \quad (23)$$

Therefore, we used a linear regression with parameters ( $a = 0.9335$ ,  $b = 22.8085$ ) to correct for the nuclear pore measurement in Sparse-SIM  $2\times$  configuration (50 nm resolution, 16 nm pixel size). To correct the pore size measured by TIRF-SIM (90 nm resolution, 32 nm pixel size), we used another set of parameters ( $a = 0.7740$ ,  $b = 62.9420$ ).

### Supplementary Note 9.2 | The bead correction factor.

In our experiments, the diameters of fluorescent beads (100 nm) were comparable in scale to the spatial resolution of the Sparse SD-SIM ( $\sim 90$  nm). Under such circumstances, the measured FWHMs were also affected by the size of the beads, which did not accurately report the actual microscope resolution. Therefore,

we intend to use the 'beads correction factor' equation derived in the PSFj<sup>38</sup> to correct for such effects (details in PSFj), and retrieving the real resolution of the optic system (FWHM<sub>PSF</sub>). In addition, per personal communication with the authors of the PSFj, we also tried to simulate a fluorescent bead to be a 3D sphere with constant fluorophore concentration over the bead volume, in which gives:

$$f(x, y, z) = \begin{cases} C_0, & 2\sqrt{x^2 + y^2 + z^2} \leq d_{bead} \\ 0, & \text{otherwise} \end{cases} \quad (24)$$

Since there is no analytical solution for the convolution of 3D sphere bead and PSF, we solved this convolution numerically with the specific experiment parameters as shown in **Supplementary Fig. 24**. In our simulations, the 100 nm 3D sphere was convolved with a 3D PSF (FWHM<sub>PSF</sub> of 88 nm × 88 nm × 260 nm), and subsequently subsampled to match the experimental condition (the pixel size of 38 nm). The resulting image had a measured bead FWHM as 110 nm, which was the same as our experimental fitted result 110 nm. For a system with higher or lower spatial resolution (FWHM<sub>PSF</sub>: 80 nm or 100 nm) would lead to measured bead FWHM varied between 102 nm and 120 nm. Therefore, we concluded that the actual FWHM<sub>PSF</sub> of our Sparse SD-SIM should be approximated 90 nm.

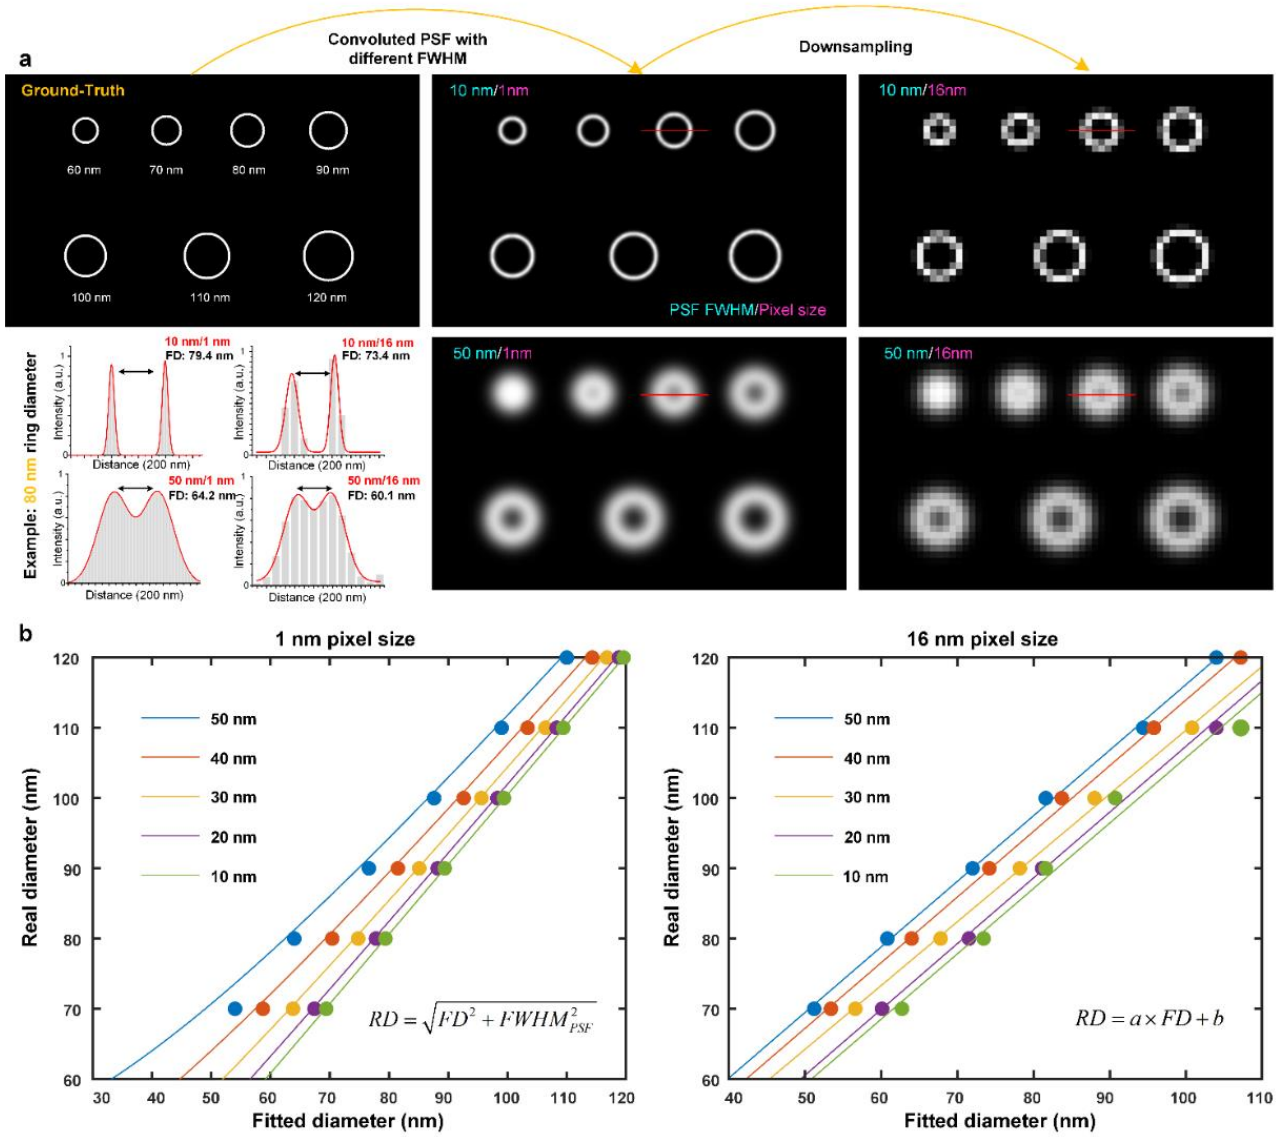

**Supplementary Fig. 23 | Relationships between fitted and real diameters of ring structures of various sizes as observed under microscopes of different resolutions and spatial sampling frequencies. (a)** The simulation workflow. A representative example of ring structures with different diameters was convolved with the PSF with FWHM of either 10 nm (upper panels) or 50 nm (bottom panels). These images were shown without (pixel size of 1 nm, left) and with spatial subsampling (pixel size of 16 nm, right). The histogram in the left-bottom corner showed examples of fitted diameters (FD) of the 80 nm ring obtained under different conditions. **(b)** Linear relationships between fitted and real diameters (RD) under 1 nm (left) or 16 nm (right) spatial sampling. Different colors indicate relationships obtained with microscopes of different spatial resolution ( $FWHM_{PSF}$ ). With sufficient spatial sampling, RD could be derived from the fitted result using the equation:  $RD = \sqrt{FD^2 + FWHM_{PSF}^2}$ . When the pixel size of the final image was comparable to the  $FWHM_{PSF}$  and the diameter of the ring, the relationships were approximated by a linear function offset by a constant,  $RD = a \times FD + b$  ( $a = 0.9335$ ,  $b = 22.8085$ ).

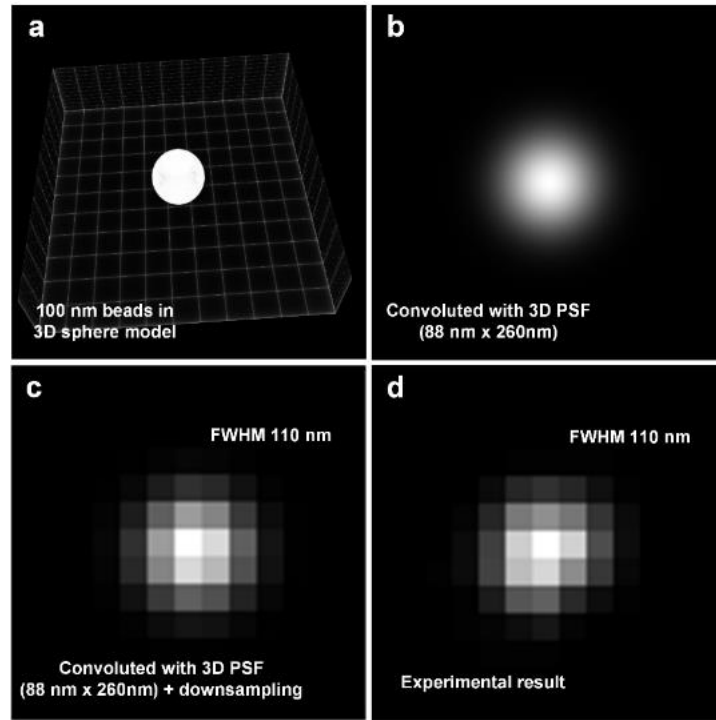

**Supplementary Fig. 24 | A similar size of the synthetic bead after convolution with the PSF of the system as compared with that detected in the real experiment. (a)** The 3D rendering of a synthetic 100 nm bead in three dimensions. **(b)** The 2D image of the bead convolved with a 3D PSF with the  $\text{FWHM}_{\text{xyz}}$  of  $88 \text{ nm} \times 88 \text{ nm} \times 260 \text{ nm}$  (1 nm pixel size). **(c)** The image in (b) was downsampled by 38 times. **(d)** The experimental image of 100 nm fluorescent bead (*c.f.*, **Extended Data Fig. 14a**), which was nearly identical to the simulated image in (c).

## Supplementary Note 10 | Other sparsity-based reconstructions that improve spatial resolution in theory.

In this part, we implemented two previous reconstruction procedures based on the sparsity concept, FISTA (Fast Iterative Shrinkage-Thresholding Algorithm)<sup>39</sup>, and NLHT (Non-Local Hard Thresholding)<sup>26, 40</sup> algorithms, which have been proposed to extend spatial resolution under coherent imaging of very sparse samples.

### Supplementary Note 10.1 | FISTA method.

Similar to bandwidth interpolation methods that were based on compressive sensing to reduce the acquisition time<sup>26, 40</sup>, FISTA reconstructs with  $l_1$  constraint that is mathematically expressed as:

$$\arg \min_{\mathbf{x}} \left\{ f(x) + \lambda \|\mathbf{x}\|_1 \right\} = \arg \min_{\mathbf{x}} \left\{ \|\mathbf{Ax} - \mathbf{b}\|_2^2 + \lambda \|\mathbf{x}\|_1 \right\}, \quad (25)$$

where the first term on the left side is the fidelity term, representing the distance between recovered image  $\mathbf{x}$  and the image obtained after the Wiener filtered result  $\mathbf{b}$ .  $\mathbf{A}$  is the point spread function (PSF) of the imaging system. The second term represents the sparsity prior,  $\|\cdot\|_1$  and  $\|\cdot\|_2$  are the  $l_1$  and  $l_2$  norms, respectively.  $\lambda$  denotes the weight factor, balancing the images fidelity and the sparsity prior.

We reconstructed the SR images with the sparsity prior based on **Eq. (25)**, a convex optimization problem resolved with the FISTA (with backtracking) algorithm<sup>39</sup>.

For the simplicity of derivation, we termed  $f(\mathbf{x}) = \|\mathbf{Ax} - \mathbf{b}\|_2^2$ . First, consider the unconstrained minimization problem of a continuously differentiable function  $f(\mathbf{x})$ :

$$\min \{ f(\mathbf{x}) \}. \quad (26)$$

The simplest methods to solve **Eq. (26)** is the gradient descent method:

$$\mathbf{x}_k = \mathbf{x}_{k-1} - t_k \nabla f(\mathbf{x}_{k-1}), \quad (27)$$

where  $t_k > 0$  is a suitable step distance. The gradient iteration **Eq. (27)** can be regarded as an extremal solution of a quadratic equation (proximal regularization of the linearized function  $f(\mathbf{x})$  at  $\mathbf{x}_{k-1}$ ), which could be rewritten in the equivalent form as

$$\mathbf{x}_k = \arg \min_{\mathbf{x}} \left\{ f(\mathbf{x}_{k-1}) + \langle \mathbf{x} - \mathbf{x}_{k-1}, \nabla f(\mathbf{x}_{k-1}) \rangle + \frac{1}{2t_k} \|\mathbf{x} - \mathbf{x}_{k-1}\|^2 \right\}, \quad (28)$$

where  $\langle \cdot, \cdot \rangle$  denotes the inner product of two vectors.



755 Adopting this same basic gradient solution to the non-smooth  $l_1$  regularized problem equal to **Eq. (25)**

$$756 \quad \mathbf{x}_k = \arg \min_{\mathbf{x}} \left\{ f(\mathbf{x}_{k-1}) + \langle \mathbf{x} - \mathbf{x}_{k-1}, \nabla f(\mathbf{x}_{k-1}) \rangle + \frac{1}{2t_k} \|\mathbf{x} - \mathbf{x}_{k-1}\|^2 + \lambda \|\mathbf{x}\|_1 \right\}. \quad (29)$$

757 After removing constant terms, the equation can be rewritten as

$$758 \quad \mathbf{x}_k = \arg \min_{\mathbf{x}} \left\{ \frac{1}{2t_k} \left\| \mathbf{x} - (\mathbf{x}_{k-1} - t_k \nabla f(\mathbf{x}_{k-1})) \right\|^2 + \lambda \|\mathbf{x}\|_1 \right\}. \quad (30)$$

759 For any  $L > 0$ , considering the quadratic approximation of  $F(x) \equiv f(x) + \lambda \|\mathbf{x}\|_1$  at a given point  $\mathbf{x}_{k-1}$ , we define

760  $Q_L(\mathbf{x}, \mathbf{x}_{k-1})$  as:

$$761 \quad Q_L(\mathbf{x}, \mathbf{x}_{k-1}) \equiv f(\mathbf{x}_{k-1}) + \langle \mathbf{x} - \mathbf{x}_{k-1}, \nabla f(\mathbf{x}_{k-1}) \rangle + \frac{L}{2} \|\mathbf{x} - \mathbf{x}_{k-1}\|^2 + \lambda \|\mathbf{x}\|_1, \quad (31)$$

762 where  $L$  is Lipschitz constant of smooth convex function  $f$ . Through formula derivation, we rewrite the formula  
763 above as follows:

$$764 \quad \mathbf{x}_k = \arg \min_{\mathbf{x}} \left\{ \frac{L}{2} \left\| \mathbf{x} - \left( \mathbf{x}_{k-1} - \frac{1}{L} \nabla f(\mathbf{x}_{k-1}) \right) \right\|^2 + \lambda \|\mathbf{x}\|_1 \right\}. \quad (32)$$

765 where **Eq. (32)** can be simply interpreted that the constant terms  $t_k$  of **Eq. (30)** are replaced by Lipschitz  
766 constant terms  $L$  to ensure the convergence. Based on **Eq. (32)**, we defined a unique minimization operator  
767  $p_L(y)$  as:

$$768 \quad p_L(\mathbf{x}_{k-1}) \equiv \arg \min_{\mathbf{x}} Q_L(\mathbf{x}, \mathbf{x}_{k-1}) = \arg \min_{\mathbf{x}} \left\{ \lambda g(\mathbf{x}) + \frac{L}{2} \left\| \mathbf{x} - \left( \mathbf{x}_{k-1} - \frac{1}{L} \nabla f(\mathbf{x}_{k-1}) \right) \right\|^2 \right\}. \quad (33)$$

769 Considering  $g(\mathbf{x}) = \|\mathbf{x}\|_1$ , we can use the soft-threshold algorithm (1) to solve  $p_L(y)$ , and let  $u = y - \frac{1}{L} \nabla f(y)$ ,

770  $a = \frac{\lambda}{L}$ , the expression is given as,

$$771 \quad \text{soft}(u, a) \equiv \text{sign}(u) \max\{|u| - a, 0\}. \quad (34)$$

772 As a result, the complete steps of the FISTA algorithm can be concluded as follows:

773 **Step 0.** Let  $L_0 > 0, \delta > 1$ , and  $\mathbf{x}_0 \in \mathbb{R}^n$ . Take  $y_1 = x_0, m_1 = 1$ .

774 **Step k.** ( $k \geq 1$ ) search the smallest nonnegative integers  $i_k$  subject to  $L' = \delta^{i_k} L_{k-1}$

$$775 \quad F(p_L(\mathbf{y}_k)) \leq Q_L(p_L(\mathbf{y}_k), \mathbf{y}_k). \quad (35)$$

776 Let  $L' = \delta^{i_k} L_{k-1}$  and proceed

$$777 \quad x_k = \text{soft}(y_k - \frac{1}{L} \nabla f(y_k), \frac{\lambda}{L}). \quad (36)$$

778 Combine the Nesterov<sup>33</sup> method to accelerate gradient update:

$$779 \quad m_{k+1} = \frac{1 + \sqrt{1 + 4m_k^2}}{2}. \quad (37)$$

$$780 \quad y_{k+1} = x_k + \left( \frac{m_k - 1}{m_{k+1}} \right) (x_k - x_{k-1}). \quad (38)$$

### 781 **Supplementary Note 10.2 | NLHT method.**

782 Adding some constraints to the FISTA algorithm yields the Non-Local hard Thresholding algorithm (NLHT)<sup>40</sup>.  
 783 Initially, the results of  $l_1$  constraint are solved by the Basis Pursuit De-Noising algorithm (BPDN), in which  
 784 the pixels with values close to zero are located by performing a nonlocal thresholding step. Each element of  $\mathbf{x}$   
 785 will be zeroed out along with its neighbors when its value is below a fixed threshold. The BPDN step is  
 786 repeated with the additional constraint that the locations corresponding to the off-support are set to zero<sup>40</sup>.  
 787 Because of the slow convergence speed, we replaced the BPDN with the FISTA to solve the convex  
 788 optimization problem and conducted non-local hard thresholding. A more detailed version of the algorithm is  
 789 provided as follows:

790 **Step 1:** Use FISTA to solve

$$791 \quad \arg \min_{\mathbf{x}} \left\{ \|\mathbf{Ax} - \mathbf{b}\|_2^2 + \lambda \|\mathbf{x}\|_1 \right\}, \quad \mathbf{x}[j] = 0, \forall j \in S. \quad (39)$$

792 where  $S$  is the index set of the zero value.

793 **Step 2:** Search all  $j'$  such that  $x[j] \leq \varsigma \max(x)$  which are distanced from  $j'$  to the right or left by 1 pixel.

794 Then add  $j'$  to  $S'$  and set  $S = S \cup S'$ . If the index set  $S$  was not updated, increase  $\varsigma$  by  $\Delta\varsigma$ . It is worth denoting  
 795 that,  $\varsigma$  and  $\Delta\varsigma$  are threshold and increment in the threshold respectively.

796 Comparison of the reconstruction results using Sparse-SIM based algorithm with FISTA and NLHT are  
 797 shown in **Supplementary Fig. 25**. It is worth noticing that, to avoid over-filtering structural information by  
 798 the NLHT (**Supplementary Fig. 25c**, pointed by yellow arrows), the iteration of these two steps needed to be  
 799 terminated after several rounds.

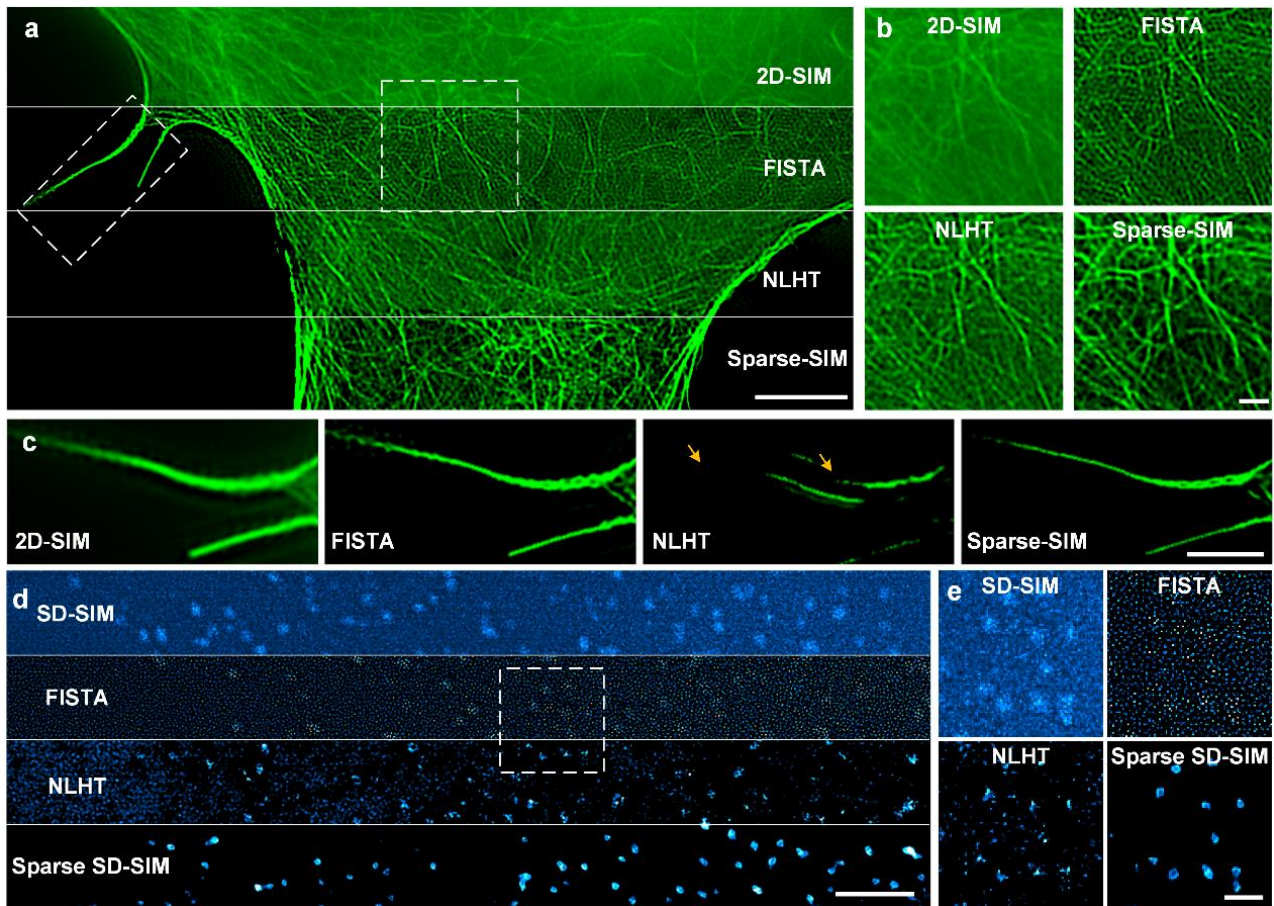

**Supplementary Fig. 25 | Comparisons of our sparse deconvolution pipeline along with pre-existing reconstruction methods based on the sparsity a priori.** (a-c) Actin filaments labeled with LifeAct-EGFP in a live COS-7 cell in Fig. 4a under the 2D-SIM, followed by the FISTA, or NLHT reconstruction, or reconstruction with our sparse algorithm. (d and e) CCPs labeled by Clathrin-EGFP under the SD-SIM in Extended Data Fig. 15, followed by the FISTA, or NLHT reconstruction, or reconstruction with our sparse algorithm. Under this condition of compromised SNR, neither FISTA nor NLHT method could resolve any ring-shaped structures. Scale bars: (a) 1  $\mu\text{m}$ ; (b and c) 500 nm; (d) 3  $\mu\text{m}$ ; (e) 1  $\mu\text{m}$ .

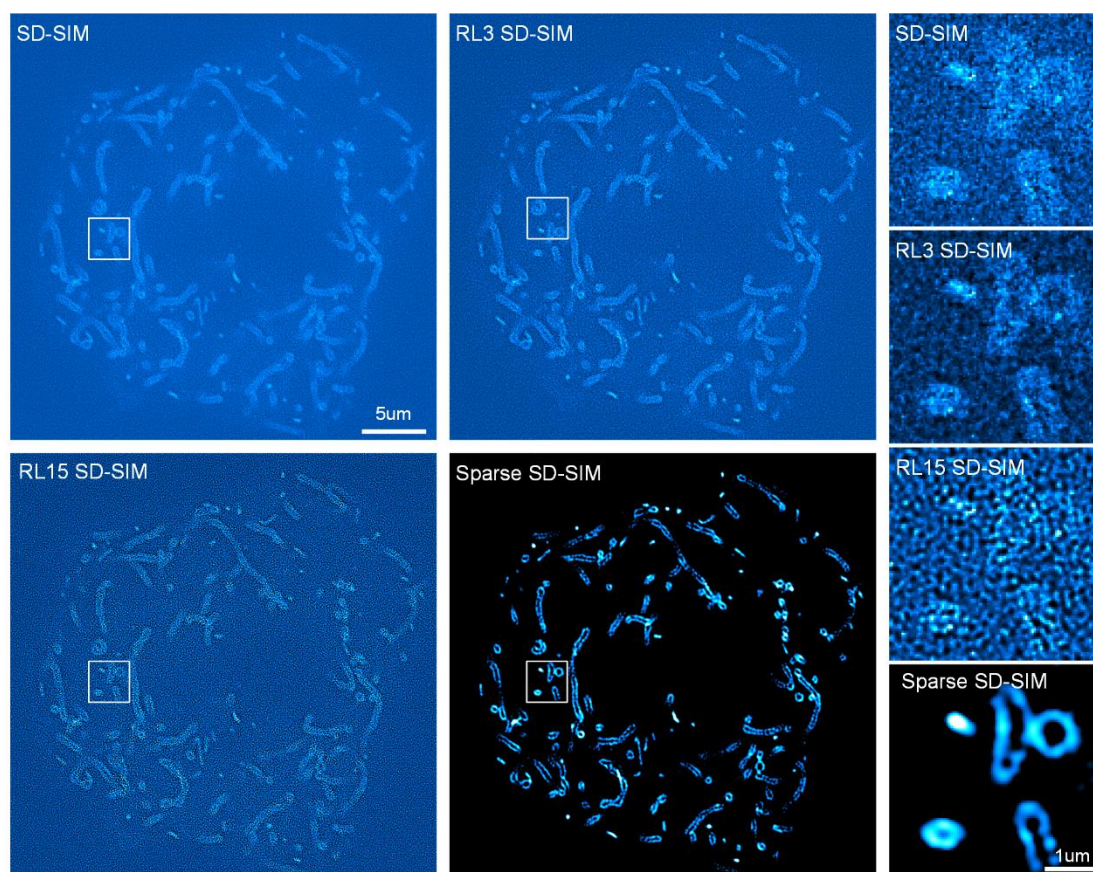

809

810 **Supplementary Fig. 26 | Comparing results of SD-SIM, RL deconvolved SD-SIM, and Sparse SD-SIM**  
811 **(c.f., Fig. 5k).** (a) OMM in a live COS-7 cell (labeled with TOM20-mCherry) under SD-SIM, SD-SIM  
812 deconvolved by RL with 3 and 15 iterations, and Sparse SD-SIM, respectively. (e) Magnified views from  
813 white boxes in (a-d) respectively. Scale bars: (a-d) 5 μm; (e) 1 μm.



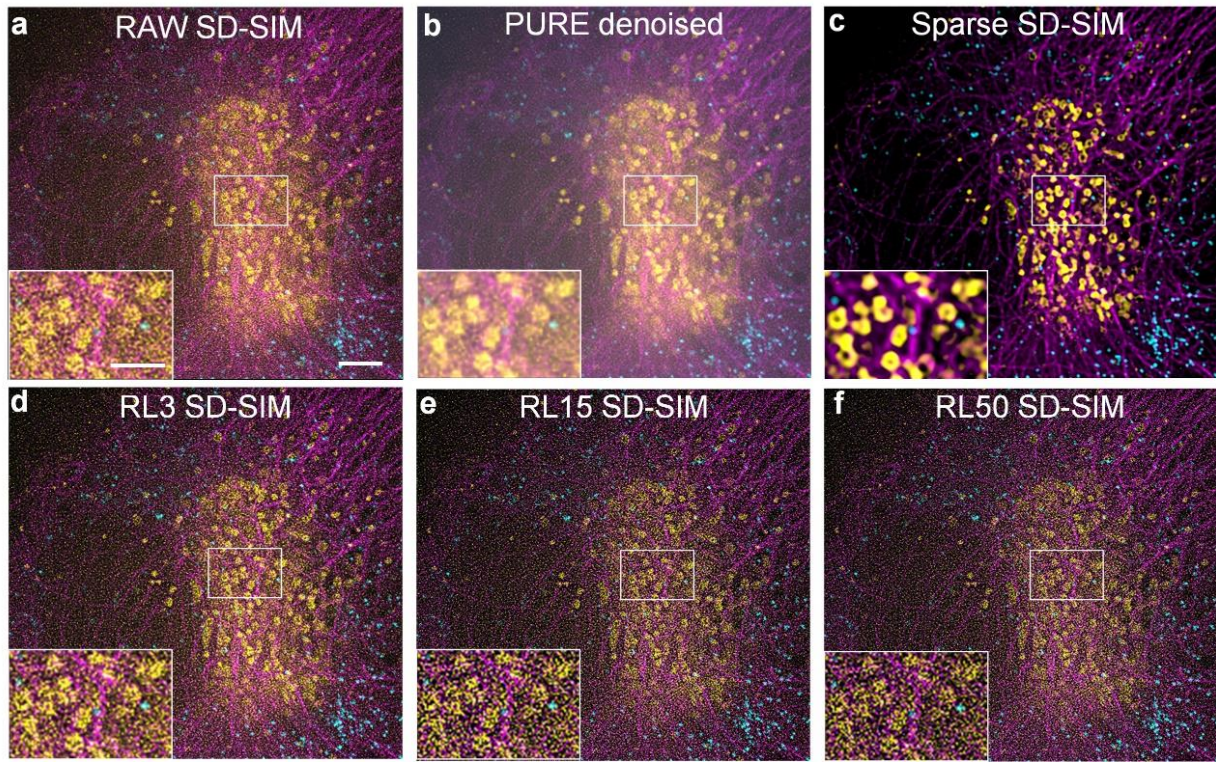

**Supplementary Fig. 27 | Comparing results of SD-SIM, PURE denoised SD-SIM, Sparse SD-SIM, and RL deconvolved SD-SIM. (c.f., Fig. 6e).** (a-c) HeLa cell labeled with tubulin-EGFP (magenta), Pex11a-BFP (cyan), and Lamp1-mCherry (yellow) captured by SD-SIM, PURE denoised<sup>41</sup> SD-SIM, Sparse SD-SIM. (d) Raw SD-SIM deconvolved by RL with 3 iterations. (e) Raw SD-SIM deconvolved by RL with 15 iterations. (f) Raw SD-SIM deconvolved by RL with 50 iterations. PURE: Poisson Unbiased Risk Estimate<sup>41</sup>. Scale bars: (a-f) 5  $\mu\text{m}$ ; (a-f, inset) 3  $\mu\text{m}$ .

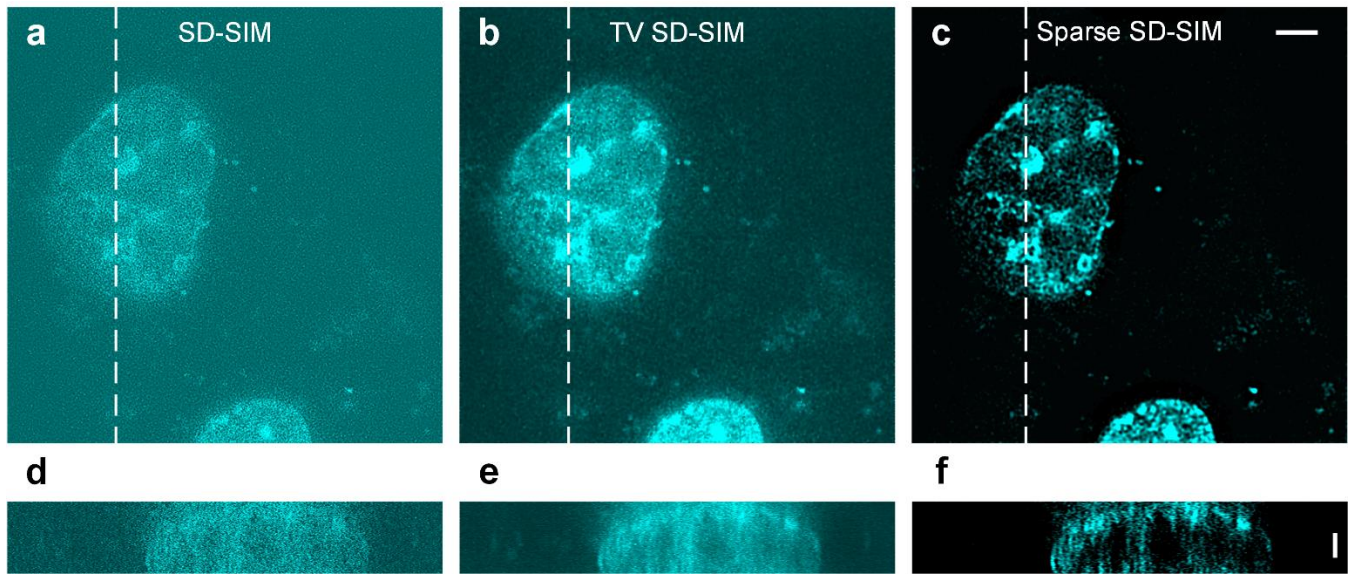

**Supplementary Fig. 28 | Comparing results of SD-SIM, TV SD-SIM, and Sparse SD-SIM (c.f., Fig. 6j).** (a-c) Hoechst in a live COS-7 cell under the SD-SIM (axial position at +3  $\mu\text{m}$ ) (a), TV<sup>30</sup> SD-SIM (b), and Sparse SD-SIM (c), respectively. (d-f) Corresponding z-axial views from the white dashed lines in (a-c). TV: Total Variance<sup>30</sup>; Scale bars: (a-c) 5  $\mu\text{m}$ ; (d-f) 2  $\mu\text{m}$ .



## Supplementary Tables

**Supplementary Table 1 | SSIM of different reconstructions from images corrupted with varying levels of noise.**

|                                     | Without noise | G (11%)       | G (25%)       | G (50%)       | G (80%)       |
|-------------------------------------|---------------|---------------|---------------|---------------|---------------|
| <b>Wiener-SIM</b>                   | 0.5612        | 0.2352        | 0.1773        | 0.1417        | 0.1445        |
| <b>Continuity</b>                   | 0.5500        | 0.2303        | 0.1724        | 0.1311        | 0.1545        |
| <b>Continuity+sparsity</b>          | <b>0.8276</b> | <b>0.6741</b> | <b>0.4766</b> | <b>0.5652</b> | <b>0.5418</b> |
| <b>Continuity<sup>+deconv</sup></b> | 0.8311        | 0.2886        | 0.1724        | 0.1790        | 0.2107        |
| <b>Sparsity<sup>+deconv</sup></b>   | 0.9430        | 0.5203        | 0.4178        | 0.2884        | 0.3191        |
| <b>Sparse-SIM</b>                   | <b>0.9570</b> | <b>0.6832</b> | <b>0.6431</b> | <b>0.6167</b> | <b>0.6376</b> |

G represented the Gaussian noise. From **Extended Data Fig. 3**.

**Supplementary Table 2 | PSNR of different reconstructions from images corrupted with varying levels of noise.**

|                                     | Without noise | G (11%)      | G (25%)      | G (50%)      | G (80%)      |
|-------------------------------------|---------------|--------------|--------------|--------------|--------------|
| <b>Wiener-SIM</b>                   | 18.08         | 10.90        | 9.39         | 8.27         | 11.32        |
| <b>Continuity</b>                   | 17.94         | 10.85        | 9.40         | 8.23         | 9.73         |
| <b>Continuity+sparsity</b>          | <b>21.63</b>  | <b>18.10</b> | <b>16.09</b> | <b>16.13</b> | <b>16.40</b> |
| <b>Continuity<sup>+deconv</sup></b> | 23.01         | 13.93        | 11.77        | 10.68        | 13.22        |
| <b>Sparsity<sup>+deconv</sup></b>   | 27.04         | 17.74        | 15.88        | 15.29        | 15.24        |
| <b>Sparse-SIM</b>                   | <b>27.92</b>  | <b>18.72</b> | <b>18.08</b> | <b>17.97</b> | <b>18.11</b> |

G represented the Gaussian noise. From **Extended Data Fig. 3**.

| Microscope    | Figure             | Label                    | Wavelength (nm) | Exposure (ms) | Illumination intensity (W/cm <sup>2</sup> ) |
|---------------|--------------------|--------------------------|-----------------|---------------|---------------------------------------------|
| SIM           | Fig. 2c            | Nup-98GFP                | 488             | 7×9           | 21                                          |
|               | Fig. 4a            | LifeAct-EGFP             | 488             | 20×9          | 2                                           |
|               | Fig. 4j            | Caveolin-EGFP            | 488             | 7×9           | 14                                          |
|               | Fig. 4m            | LAMP1-EGFP               | 488             | 20×9          | 2                                           |
|               |                    | LysoView 488             |                 |               |                                             |
|               |                    | LipidSpot 488            |                 |               |                                             |
|               | Fig. 4o            | VAMP2-pHluorin           | 488             | 0.2×9         | 187                                         |
|               | ExFig. 5f          | Clathrin-EGFP            | 488             | 7×9           | 14                                          |
|               | ExFig. 14a         | MitoTracker Green        | 488             | 7×9           | 14                                          |
|               |                    | Tom20-mScarlet           | 561             | 7×9           | 50                                          |
| Expansion-SIM | Fig. 3             | MitoTracker Green        | 488             | 7×9           | 14                                          |
|               |                    | Sec61β-mCherry           | 561             | 7×9           | 100                                         |
| SD-SIM        | Fig. 5a            | α-tubulin                | 488             | 20×9          | 20                                          |
|               | Fig. 5g, ExFig. 15 | Sec61β-GFP               | 488             | 200           | 0.91                                        |
|               |                    | Clathrin-EGFP            |                 |               |                                             |
|               |                    | Lifeact-EGFP             |                 |               |                                             |
|               | Fig. 5k            | Clathrin-DsRed           | 561             | 300           | 12.11                                       |
|               |                    | Tom20-mCherry            | 561             | 200           | 8.84                                        |
|               |                    | Hoechst H1399            | 405             | 200           | 0.87                                        |
|               | Fig. 5h            | Tubulin-EGFP             | 488             | 200           | 0.91                                        |
|               |                    | Lamp1-mCherry            | 561             | 200           | 8.84                                        |
|               |                    | MitoTracker® Deep Red FM | 640             | 50            | 1.07                                        |
|               | Fig. 6a            | Sec61β-EGFP              | 488             | 200           | 0.91                                        |
|               | Fig. 6e            | Pex11a-BFP               | 405             | 100           | 0.87                                        |
|               |                    | Tubulin-EGFP             | 488             | 300           | 0.91                                        |
|               |                    | Lamp1-mCherry            | 561             | 200           | 4.96                                        |
|               | Fig. 6h            | Hoechst H1399            | 405             | 50            | 0.87                                        |
|               |                    | Tubulin-EGFP             | 488             | 200           | 0.89                                        |
|               |                    | MitoTracker® Deep Red FM | 640             | 50            | 0.27                                        |
| STED          | ExFig. 16          | Sec61β-EGFP              | 488             | 200           | 0.77                                        |
|               | ExFig. 17          | Lysotracker Deep Red     | 640             | 200           | 0.92                                        |
|               |                    | GCaMP6s                  | 488             | 90            | 0.27                                        |
|               | ExFig. 18a         | Mab414                   | 590             |               | Et.: 112<br>Dt.: 229×10 <sup>6</sup>        |
|               | ExFig. 18f         | Tom20                    | 594             |               | Et.: 74<br>Dt.: 48×10 <sup>6</sup>          |
|               |                    | Tubulin                  | 635             |               | Et.: 97<br>Dt.: 14×10 <sup>6</sup>          |
|               | ExFig. 19a         | Lifeact-GFP              | 488             |               | Et.: 109<br>Dt.: 16×10 <sup>6</sup>         |
|               | ExFig. 19b         | Sec61β-GFP               | 488             |               | Et.: 156<br>Dt.: 13×10 <sup>6</sup>         |
|               | ExFig. 19c         | SiR-Tubulin              | 651             |               | Et.: 307<br>Dt.: 158×10 <sup>6</sup>        |
| MTPM          | ExFig. 20          | Thy1-GFP                 | 920             |               | 3.98×10 <sup>6</sup>                        |

**Supplementary Table 4 | Non-zero ratios and background selections of different images.**

| Figure         | Label                    | Modality | Non-zero number<br>(Raw / Sparse) | Non-zero ratio<br>(Raw / Sparse) | Pixel number                         | Background |
|----------------|--------------------------|----------|-----------------------------------|----------------------------------|--------------------------------------|------------|
| <b>Fig. 2c</b> | Nup98-GFP                | TIRF-SIM | 1037042 / 159384                  | 99 % / 4 %                       | $1024 \times 1024$<br>( $\times 2$ ) | Weak-HI    |
| <b>Fig. 4a</b> | LifeAct-EGFP             | 2D-SIM   | 1675100 / 589824                  | 71 % / 25 %                      | $1536 \times 1536$                   | No         |
| <b>Fig. 4j</b> | Caveolin-EGFP            | TIRF-SIM | 566376 / 1215637                  | 82 % / 44 %                      | $793 \times 871$<br>( $\times 2$ )   | No         |
| <b>Fig. 4m</b> | LAMP1-EGFP               | 2D-SIM   | 2312110 / 117965                  | 98 % / 5 %                       | $1536 \times 1536$                   | Strong-HI  |
| <b>Fig. 4m</b> | LysoView 488             | 2D-SIM   | 2345140 / 212336                  | 99 % / 9 %                       | $1536 \times 1536$                   | Strong-HI  |
| <b>Fig. 4m</b> | LipidSpot 488            | 2D-SIM   | 2264924 / 94371                   | 96 % / 4 %                       | $1536 \times 1536$                   | Strong-HI  |
| <b>Fig. 4o</b> | VAMP2-pHluorin           | TIRF-SIM | 64659 / 1180                      | 88 % / 0.04 %                    | $512 \times 144$<br>( $\times 2$ )   | No         |
| <b>Fig. 5a</b> | Clathrin-EGFP            | SD-SIM   | 751564 / 37578                    | 100 % / 5 %                      | $899 \times 836$                     | Strong-HI  |
| <b>Fig. 5h</b> | Lamp1-mCherry            | SD-SIM   | 1327104 / 185795                  | 100 % / 14 %                     | $1152 \times 1152$                   | Strong-HI  |
| <b>Fig. 5h</b> | MitoTracker® Deep Red FM | SD-SIM   | 1327104 / 225608                  | 100 % / 17 %                     | $1152 \times 1152$                   | Strong-HI  |
| <b>Fig. 5h</b> | Hoechst H1399            | SD-SIM   | 1327104 / 1008599                 | 100 % / 76 %                     | $1152 \times 1152$                   | Strong-LI  |
| <b>Fig. 5h</b> | Tubulin-EGFP             | SD-SIM   | 1327104 / 1167852                 | 100 % / 88 %                     | $1152 \times 1152$                   | Weak-LI    |
| <b>Fig. 5k</b> | Tom20-mCherry            | SD-SIM   | 1015950 / 547597                  | 100 % / 54 %                     | $1042 \times 975$<br><b>3D-MIP</b>   | Strong-HI  |

| Figure           | Label                    | Modality | Non-zero number<br>(Raw / Sparse) | Non-zero ratio<br>(Raw / Sparse) | Pixel number                                    | Background |
|------------------|--------------------------|----------|-----------------------------------|----------------------------------|-------------------------------------------------|------------|
| <b>Fig. 6a</b>   | Sec61 $\beta$ -EGFP      | SD-SIM   | 262144 / 555745                   | 100 % / 53 %                     | 512 $\times$ 512<br>( $\times$ 2)               | Weak-LI    |
| <b>Fig. 6e</b>   | Tubulin-EGFP             | SD-SIM   | 262144 / 786432                   | 100 % / 75 %                     | 512 $\times$ 512<br>( $\times$ 2)               | No         |
| <b>Fig. 6e</b>   | Lamp1-mCherry            | SD-SIM   | 262144 / 94371                    | 100 % / 9 %                      | 512 $\times$ 512<br>( $\times$ 2)               | Strong-LI  |
| <b>Fig. 6e</b>   | Pex11a-BFP               | SD-SIM   | 262144 / 41943                    | 100 % / 4 %                      | 512 $\times$ 512<br>( $\times$ 2)               | No         |
| <b>Fig. 6h</b>   | Hoechst H1399            | SD-SIM   | 262144 / 576717                   | 100 % / 55 %                     | 512 $\times$ 512<br>( $\times$ 2) <b>3D-MIP</b> | Strong-HI  |
| <b>Fig. 6h</b>   | MitoTracker® Deep Red FM | SD-SIM   | 262144 / 377487                   | 100 % / 36 %                     | 512 $\times$ 512<br>( $\times$ 2) <b>3D-MIP</b> | Strong-HI  |
| <b>Fig. 6h</b>   | Tubulin-EGFP             | SD-SIM   | 262144 / 450888                   | 100 % / 43 %                     | 512 $\times$ 512<br>( $\times$ 2) <b>3D-MIP</b> | Strong-LI  |
| <b>ExFig.13a</b> | MitoTracker Green        | 2D-SIM   | 249037 / 99615                    | 95 % / 38 %                      | 512 $\times$ 512                                | No         |
| <b>ExFig.13a</b> | Tom20-mScarlet           | 2D-SIM   | 209715 / 39322                    | 80 % / 15 %                      | 512 $\times$ 512                                | No         |
| <b>ExFig.13e</b> | MitoTracker Green        | 2D-SIM   | 254280 / 18350                    | 97 % / 7 %                       | 512 $\times$ 512                                | No         |
| <b>ExFig.13e</b> | Sec61 $\beta$ -mCherry   | 2D-SIM   | 214958 / 28836                    | 82 % / 11 %                      | 512 $\times$ 512                                | No         |
| <b>ExFig.17</b>  | GCaMP6s                  | SD-SIM   | 2303136 / 852160                  | 100 % / 37 %                     | 1454 $\times$ 1584                              | No         |

| Figure         | Label              | Size ( $x \times y \times t/z$ )      | GPU time | CPU time  |
|----------------|--------------------|---------------------------------------|----------|-----------|
| <b>Fig. 2c</b> | Nup-98GFP          | $2048 \times 2048 \times 200$ ( $t$ ) | ~1800 s  | ~1812 min |
| <b>Fig. 3a</b> | $\alpha$ -tubulin  | $2048 \times 2048 \times 10$ ( $t$ )  | ~90 s    | ~92 min   |
| <b>Fig. 3d</b> | Sec61 $\beta$ -GFP | $2048 \times 2048 \times 10$ ( $t$ )  | ~90 s    | ~92 min   |
| <b>Fig. 4a</b> | LifeAct-EGFP       | $1536 \times 1536 \times 20$ ( $t$ )  | ~90 s    | ~46 min   |
| <b>Fig. 4j</b> | Caveolin-EGFP      | $2048 \times 2048 \times 200$ ( $t$ ) | ~1680 s  | ~1708 min |
| <b>Fig. 4m</b> | LAMP1-EGFP         | $1536 \times 1536 \times 50$ ( $t$ )  | ~188 s   | ~120 min  |
| <b>Fig. 5a</b> | Clathrin-EGFP      | $873 \times 873 \times 100$ ( $t$ )   | ~140 s   | ~80 min   |
| <b>Fig. 5g</b> | Clathrin-DsRed     | $1152 \times 1152 \times 200$ ( $t$ ) | ~425 s   | ~329 min  |
| <b>Fig. 5k</b> | Tom20-mCherry      | $1152 \times 1152 \times 110$ ( $z$ ) | ~231 s   | ~181 min  |
| <b>Fig. 5h</b> | Hoechst H1399      | $1152 \times 1152 \times 100$ ( $t$ ) | ~210 s   | ~165 min  |

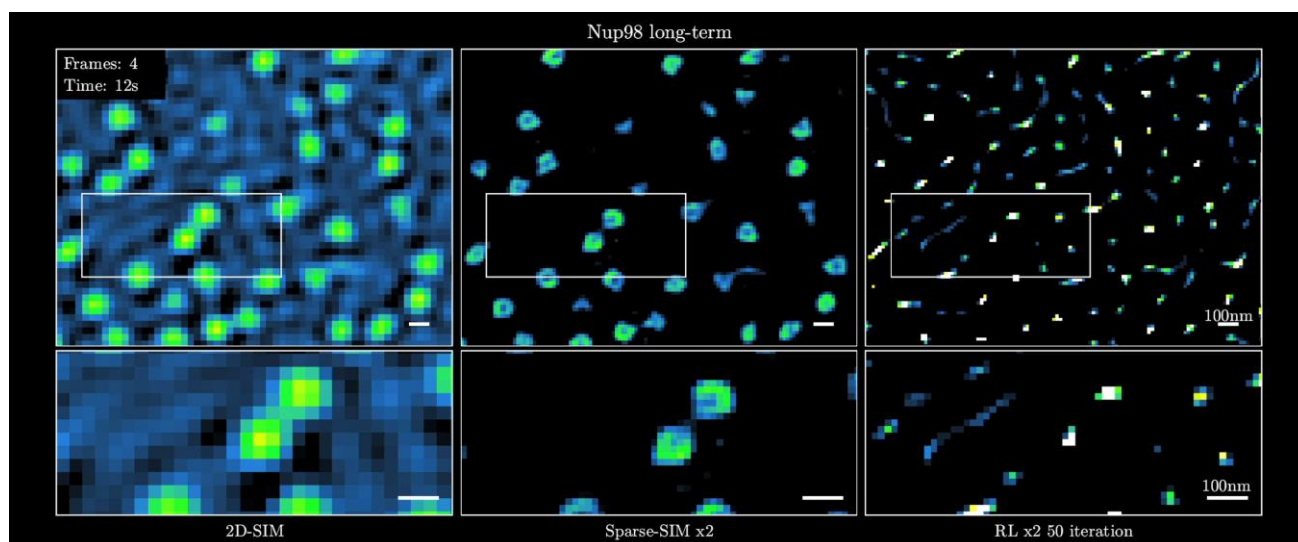

840

841 **Supplementary Video 1 | Ring-shaped Nup98 pores resolved with the Sparse-SIM 2 $\times$ .** Nuclear pores  
842 labeled with Nup98-GFP in a live COS-7 cell with 4 s interval imaged by 2D-SIM, 2D-SIM followed by RL  
843 deconvolution and Sparse-SIM 2 $\times$  (*c.f.*, **Fig. 2c**) demonstrate that only Sparse-SIM 2 $\times$  can resolve the ring-  
844 shaped Nup98.



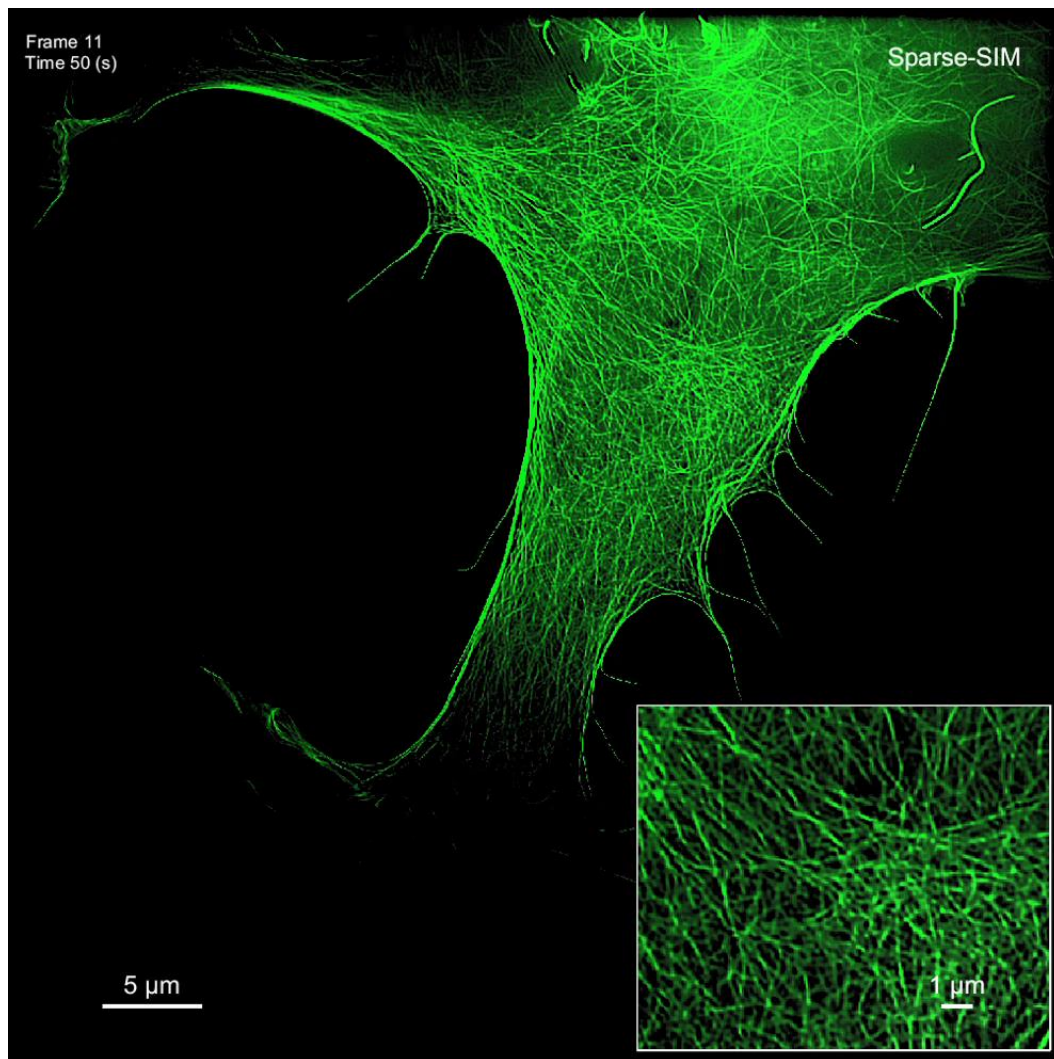

845

846 **Supplementary Video 2 | Dense actin mesh network revealed due to improved spatial resolution and**  
847 **enhanced contrast.** Part I compares the actin results by 2D-SIM, Hessian-SIM and Sparse-SIM,  
848 demonstrating that finer structures of the dense actin mesh network can be revealed only with Sparse-SIM  
849 (*c.f.*, **Fig. 4a**). Part II exhibits the corresponding profiles of the red and blue lines from 2D-SIM (left) and  
850 Sparse-SIM (right) over 20 frames at 5 s intervals, showing the enhanced contrast available with Sparse-SIM.

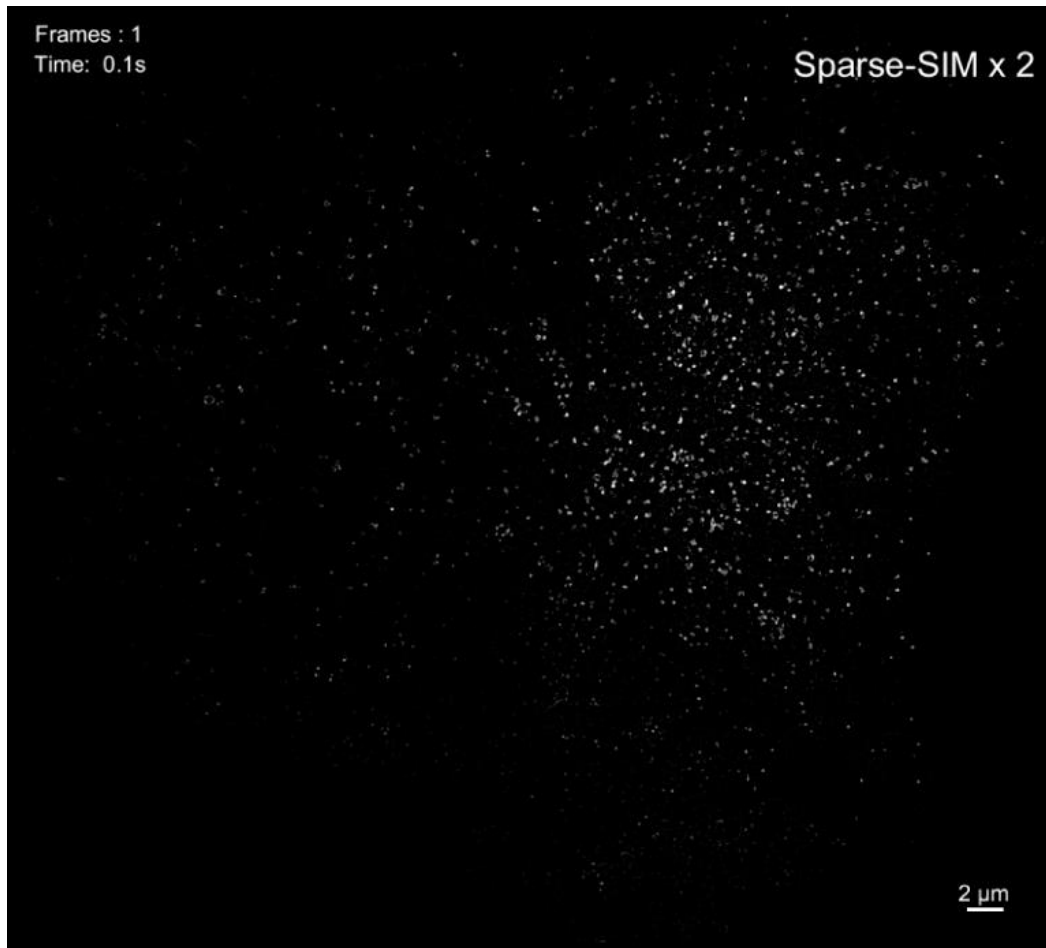

**Supplementary Video 3 | Ring-shaped caveolae revealed by the Sparse-SIM 2×.** The caveolae in a COS-7 cell at 37°C transfected with Caveolin-EGFP by TIRF, TIRF-SIM, Sparse-SIM and Sparse-SIM 2× (*c.f.*, **Fig. 4j**).

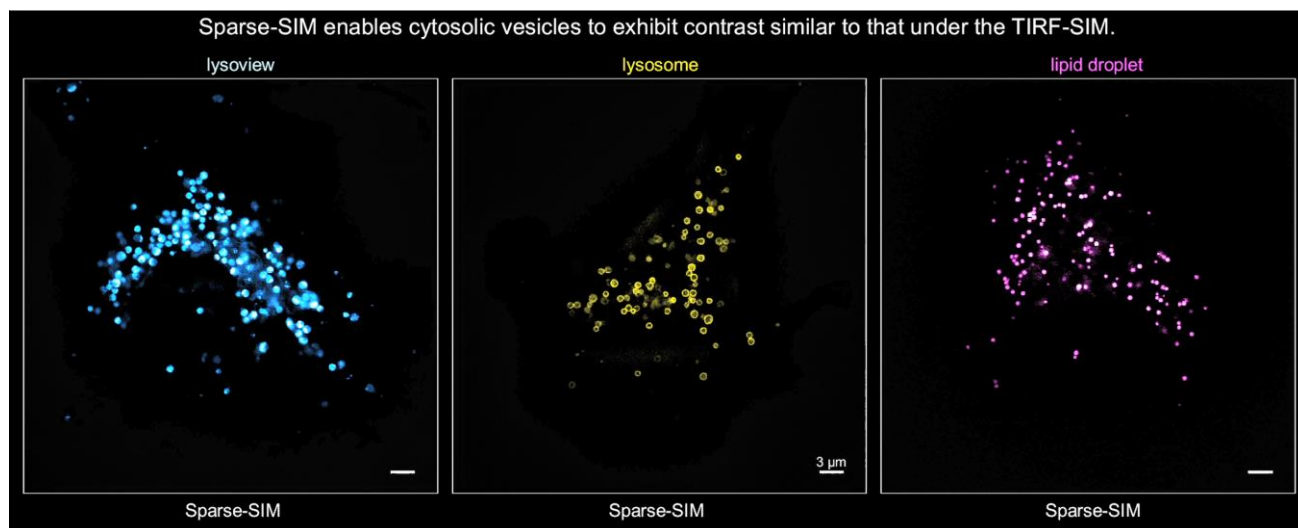

**Supplementary Video 4 | Improved contrast of fluorescent vesicles deep in the cytosol under the Sparse-SIM.** Part I the structures labeled with LAMP1-EGFP, LysoView, and LipidSpot in COS-7 cells are shown from left to right at 5 s intervals (*c.f.*, **Fig. 4m**). Part II compares the 2D-SIM, Hessian-SIM and Sparse-SIM performances on three individual organelles and the corresponding magnified regions of interest.

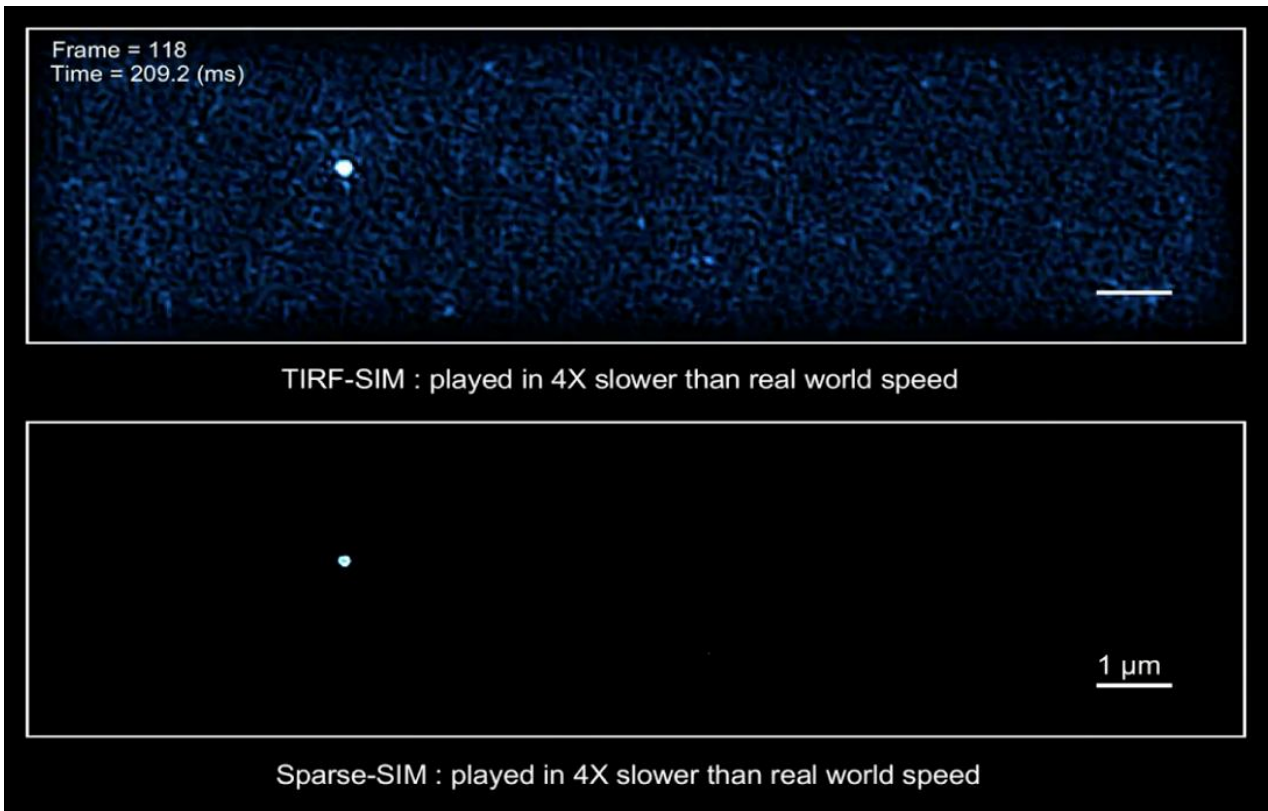

860

861

862

863

864

**Supplementary Video 5 | Visualization of ultrafast vesicle fusion (played 4x slower than real-world speed).** Fusion pores by TIRF-SIM (top) and Sparse-SIM (bottom) played at a speed 4x slower than real world rates. Vesicle in an INS-1 cell labeled with VAMP2-pHluorin by TIRF-SIM and Sparse-SIM, respectively (*c.f.*, **Fig. 4o**).

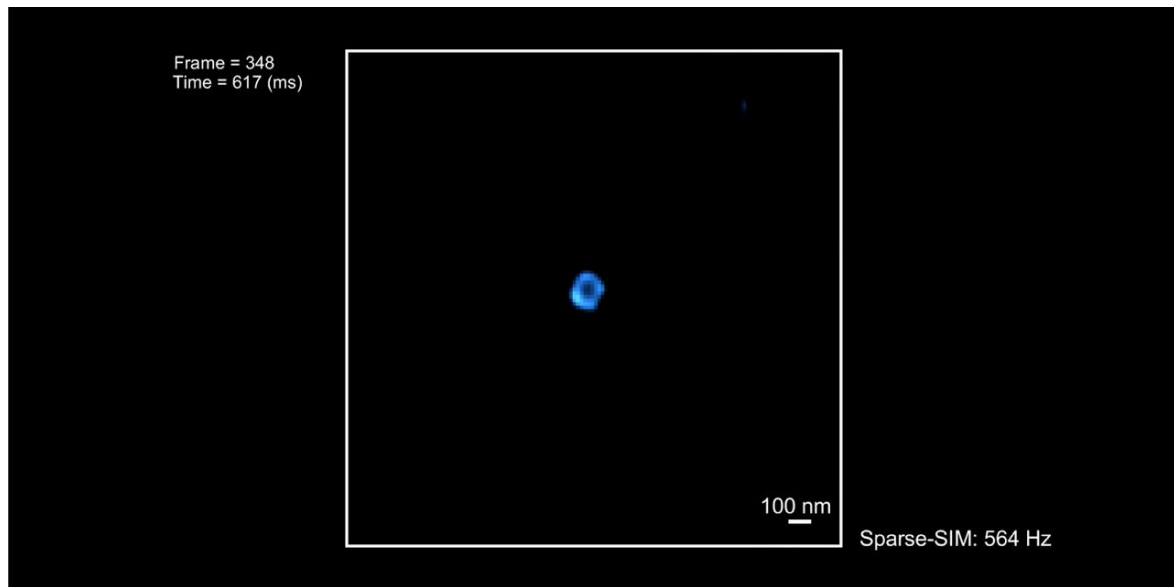

865

866

**Supplementary Video 6 | Vesicle with a 60 nm pore diameter captured by the Sparse-SIM at 564 Hz.**

867

The initial opening of the fusion pore occurred much earlier, and its duration was much longer under Sparse-

868

SIM than under TIRF-SIM (same data as in **Supplementary Video 5**).

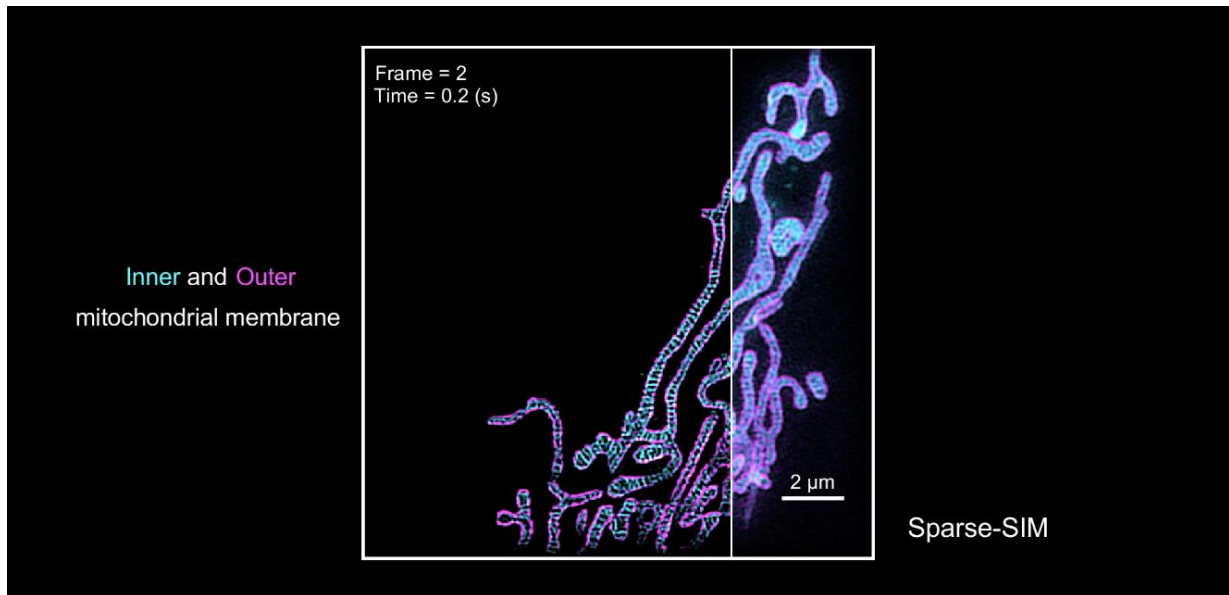

869

870

871

872

873

874

875

**Supplementary Video 7 | Asynchronized movements between the outer and inner mitochondrial membranes revealed by dual-color Sparse-SIM.** Outer and inner mitochondrial membranes (OMM and IMM, labeled by Tom20- mScarlet and Mito-Tracker Green, respectively) by 2D-SIM and Sparse-SIM for 30 frames with a 0.2 s acquisition time (*c.f.*, **Extended Data Fig. 13a**). The extension of the inner mitochondrial membrane was not enclosed by the Tom20-labeled structures captured by Sparse-SIM in a few frames, demonstrating the nonhomogenous distribution of Tom20 on the OMM.



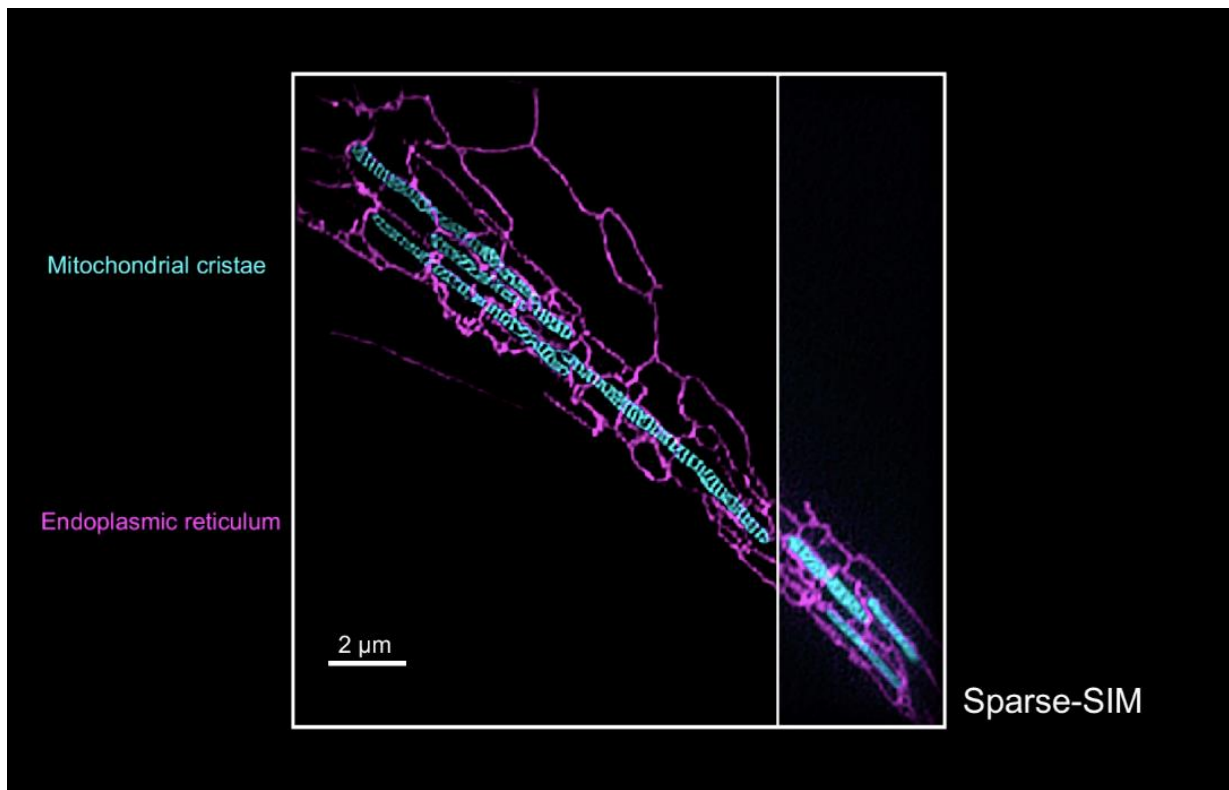

876

877 **Supplementary Video 8 | Relative dynamics between ER tubules and inner mitochondrial membrane**  
 878 **recorded by dual-color Sparse-SIM.** The inner mitochondrial membrane (cyan) and ER (magenta) in a COS-  
 879 7 cell labeled by MitoTracker Green and Sec61 $\beta$ -mCherry (*c.f.*, **Extended Data Fig. 13f**). Part I compares the  
 880 IMM, and ER by dual-color 2D-SIM and Sparse-SIM. In Part II, the ER contacts the IMM, rearranging the  
 881 orientations of the inner cristae structures. Part III shows the equal probability of ER tubules contacting the  
 882 mitochondria at cristae regions or in the matrix between cristae.

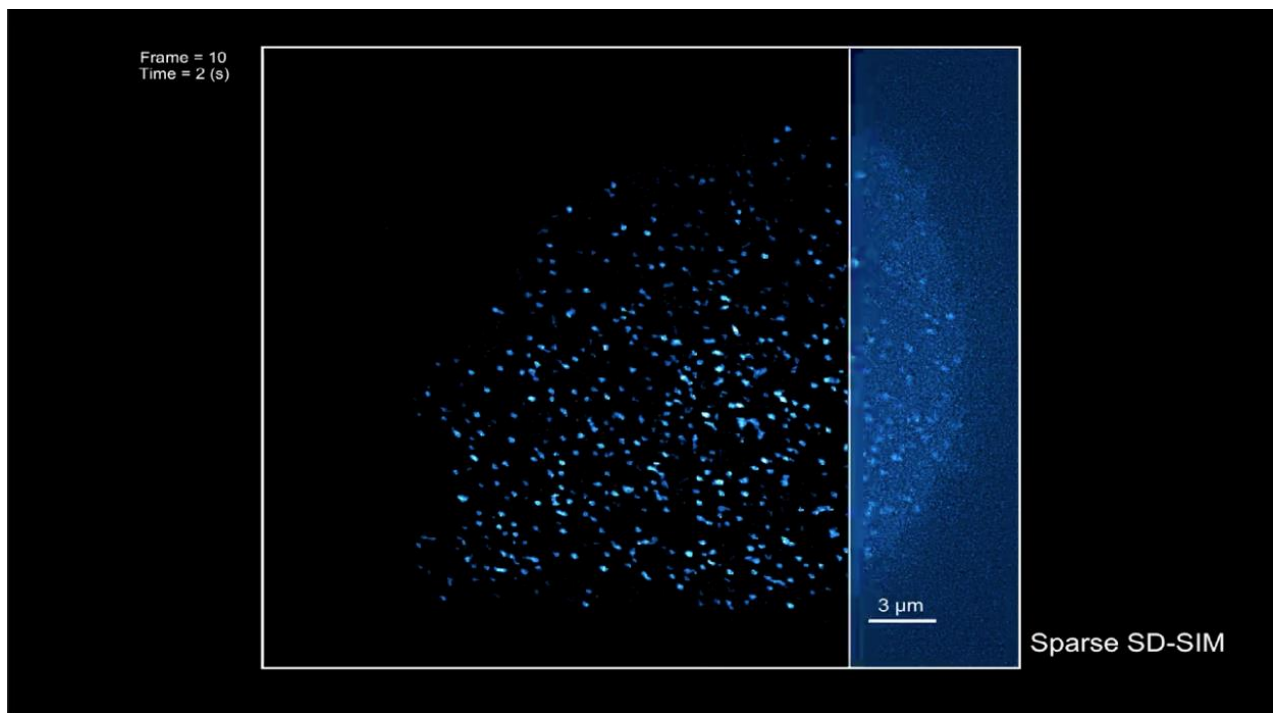

**Supplementary Video 9 | Ring-shaped structure of clathrin-coated pits resolved by the Sparse SD-SIM.**

Comparison of clathrin-coated pits (CCPs) in COS-7 cells expressing clathrin-EGFP light chains for 100 time points with a 0.2 s exposure time imaged by SD-SIM and Sparse SD-SIM, respectively (*c.f.*, **Fig. 5a**).

Disintegration (part II of the video) and disappearance (part III) events of CCPs are resolved only by Sparse-SD-SIM.

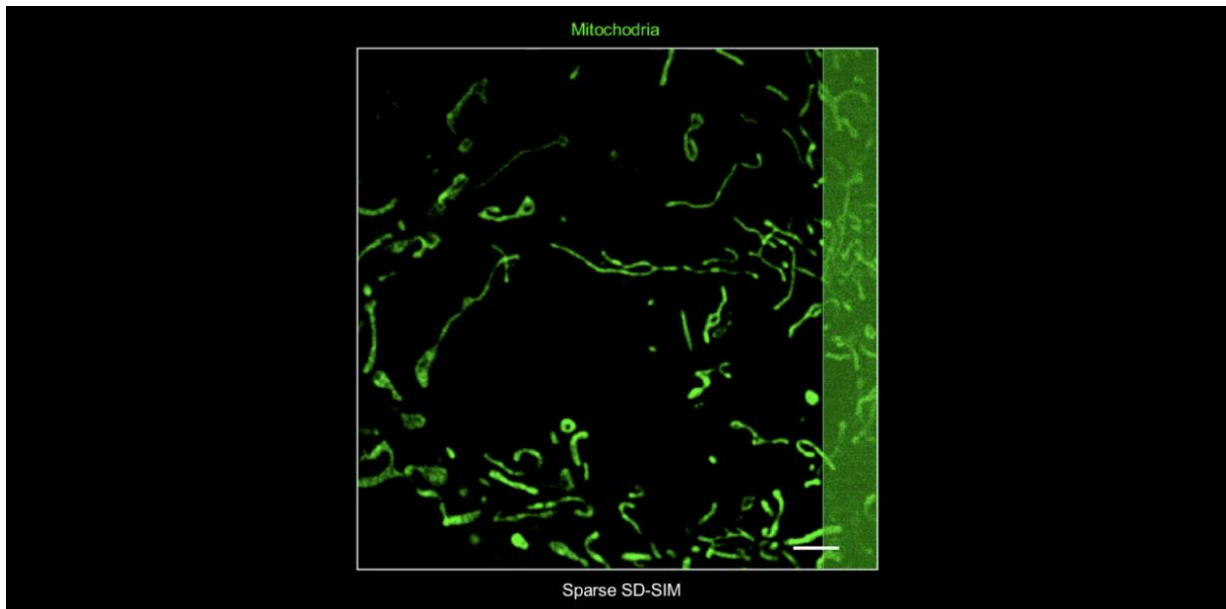

**Supplementary Video 10 | Four-color sub-90-nm resolution live-cell imaging of lysosomes (yellow), mitochondria (green), nuclei (blue), and microtubules (magenta).** A COS-7 cell labeled with LAMP1-mCherry (yellow), Mito-Tracker (green), Hoechst (blue), and Tubulin-EGFP (magenta) imaged by SD-SIM and Sparse SD-SIM for 100 frames at a 2.3 s exposure time (*c.f.*, **Fig. 5h**). Part I shows the SD-SIM performance of the four organelles, which gradually transfer to Sparse SD-SIM in sequence. Then, the four organelles under SD-SIM and Sparse SD-SIM are compared simultaneously showing the striking contrast. Part II displays the dynamics of the magnified selection region in part I.

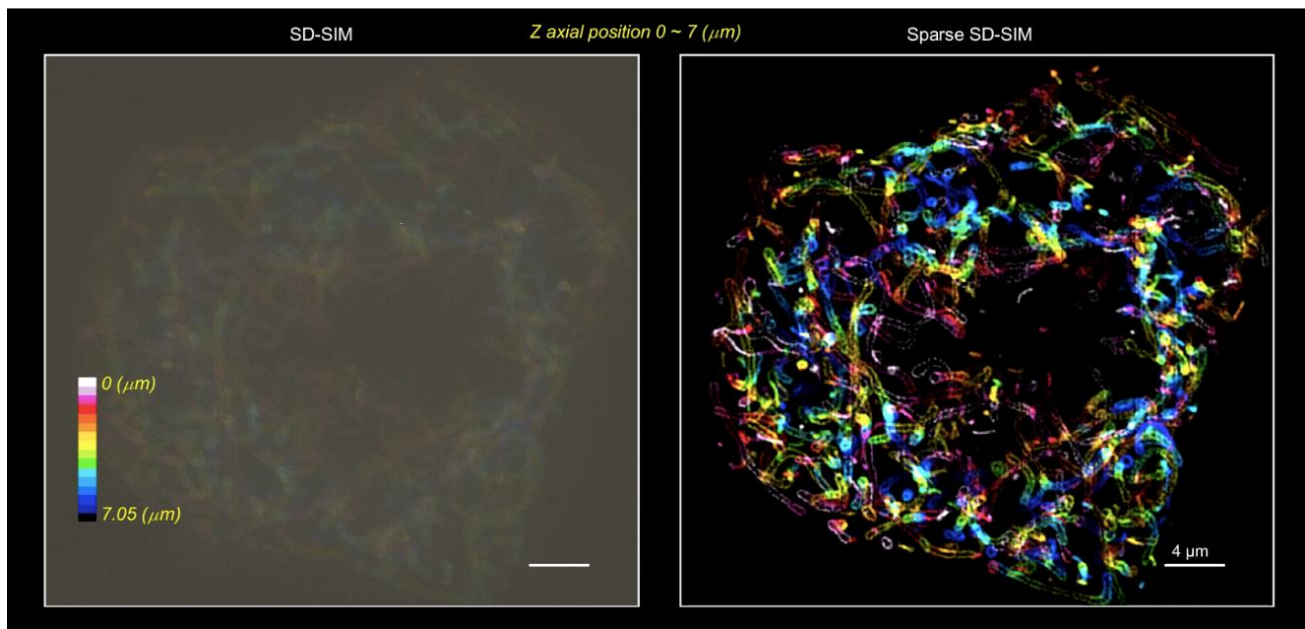

**Supplementary Video 11 | Live-cell 3D image of the mitochondrial membrane in a dividing cell with the depth of field of up to ~7  $\mu\text{m}$ .** Mitochondrial expressions of the outer membrane marker TOM20-mCherry captured by SD-SIM and Sparse SD-SIM. (*c.f.*, **Fig. 5k**). Part I shows the color-coded projection of the mitochondrial membrane in the z direction as the depth increases gradually and the y-z orthoslices along the x-axis. Part II displays multi-angle views of the 3D rendering volume of the mitochondrial membrane showing the details recorded by SD-SIM (red) and Sparse SD-SIM (green).

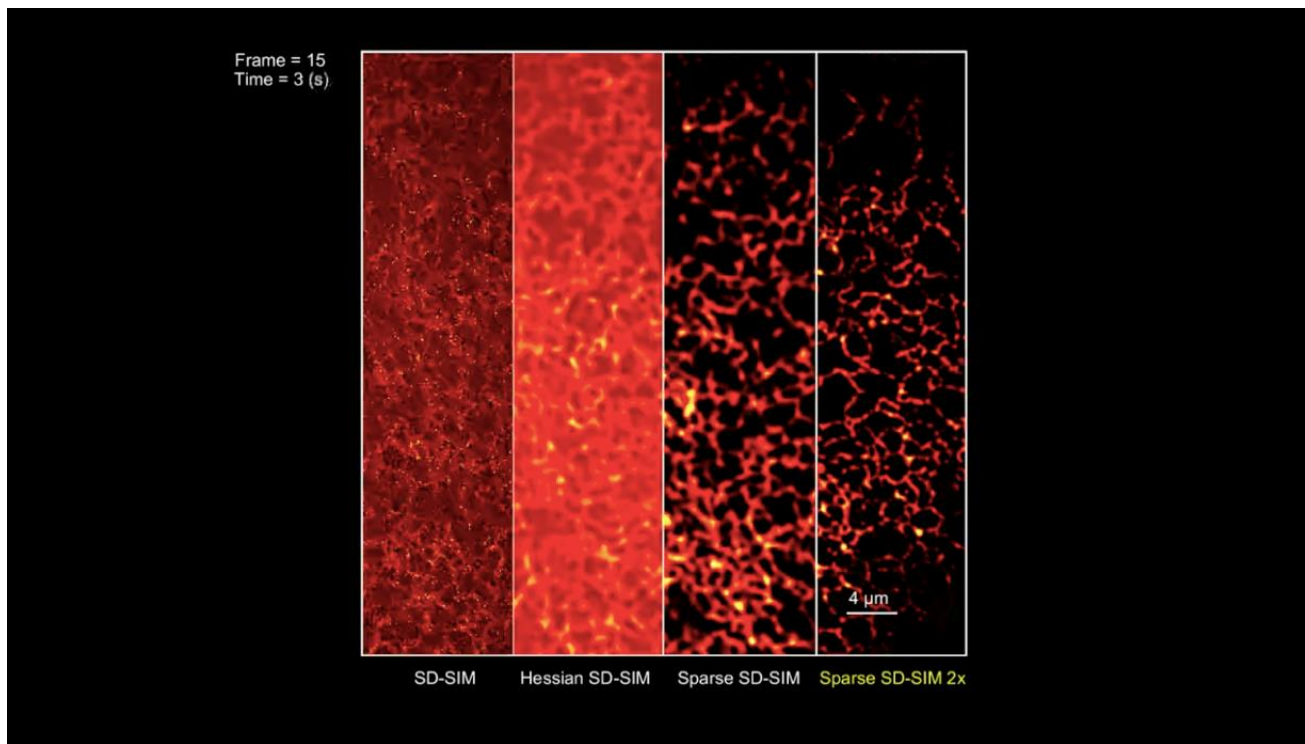

**Supplementary Video 12 | ER tubular structures under Nyquist insufficient sampling paradigm resolved by the Sparse SD-SIM 2 $\times$  configuration.** Tubular ER in the periphery of a COS-7 cell labeled with Sec61 $\beta$ -EGFP. Part I shows a comparison of the tubular ER by SD-SIM, Hessian SD-SIM, Sparse SD-SIM, and Sparse SD-SIM 2 $\times$  (*c.f.*, **Fig. 6a**). Part II compares the tubular ER by SD-SIM (left) with those by Sparse SD-SIM (right) 2 $\times$  for 500 time points at a 0.2 s acquisition time. A magnified view of the selected region in Part II is shown in Part III.



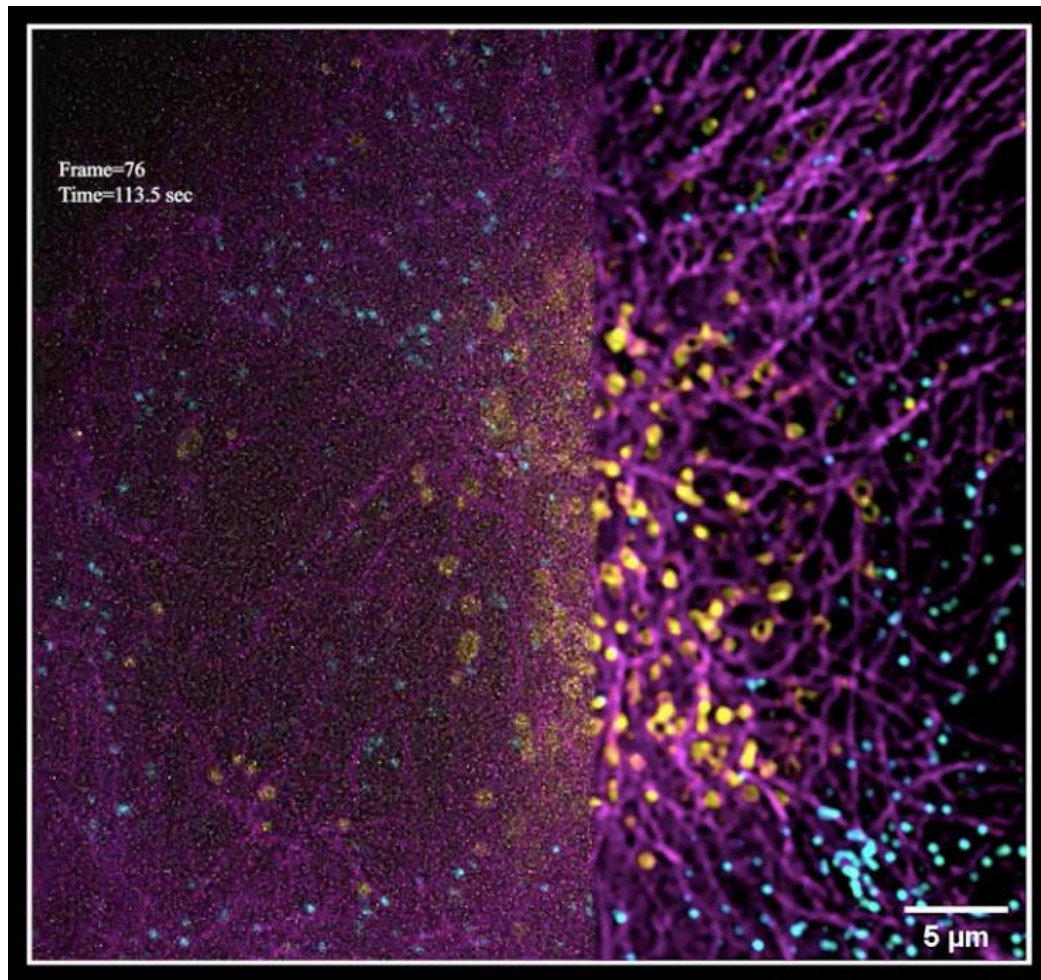

**Supplementary Video 13 | Microtubules regulate lysosome-peroxisome membrane contacts in live cells captured by three-color Sparse SD-SIM 2× imaging.** Part I: A time-lapse full-field view comparison of SD-SIM and Sparse SD-SIM 2×. Part II: The two zoomed-in examples show a comparison of the images by SD-SIM and Sparse SD-SIM 2× (*c.f.*, **Fig. 6e**). The first example shows a lysosome moving along the microtubule to make membrane contact the peroxisome for close to 2 mins; the deformation of the lysosome membrane during the contact period can be detected only by Sparse SD-SIM 2×. The second example shows a lysosome-peroxisome membrane in contact moving along microtubules together in a relatively dense microtubule region; the movement can be detected only by Sparse SD-SIM 2×.



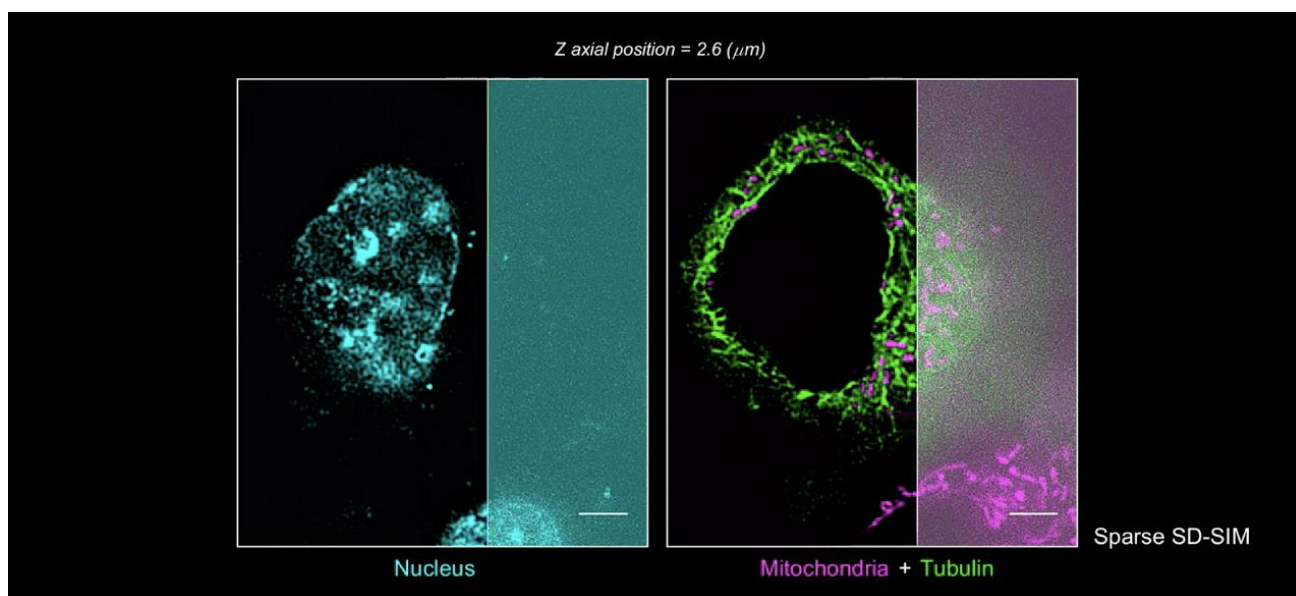

**Supplementary Video 14 | Three-color 3D volume rendered views under the Sparse SD-SIM 2 $\times$  configuration.** Live-cell three-color 3D imaging of a COS-7 cell labeled with Tubulin-EGFP (green), Hoechst (cyan), and MitoTracker® Deep Red FM (magenta) under Sparse SD-SIM 2 $\times$  (*c.f.*, **Fig. 6h**). Part I shows  $x$ - $y$  orthoslices gradually forming color-coded volumes of nuclei (left), mitochondria (middle), and microtubules (right). Part II displays three-color 3D volume rendered views of nuclei, mitochondria, and microtubules from various angles.

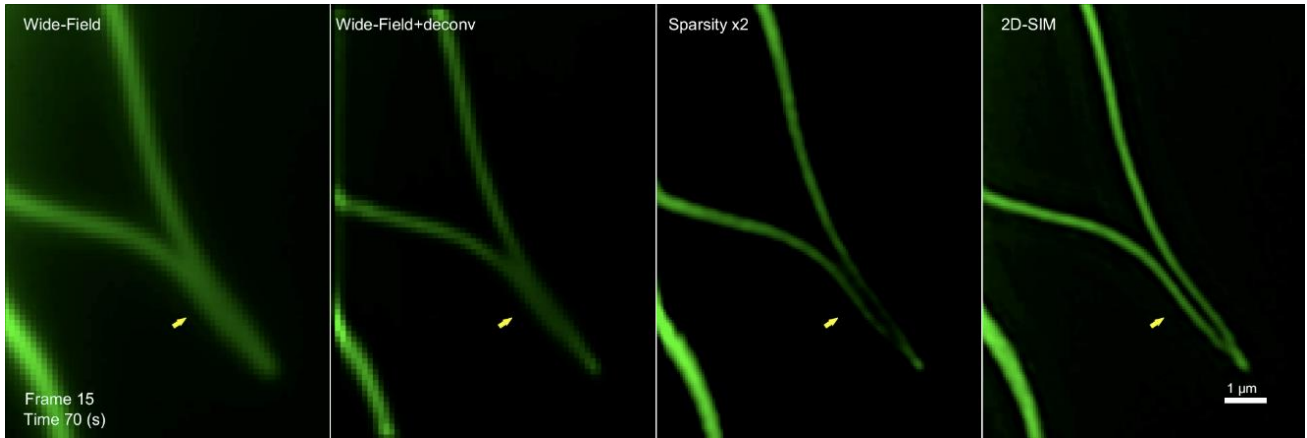

**Supplementary Video 15 | Benchmarks of time-varying actin filaments under different approaches according to the ground truth 2D-SIM images.** Two branched actin filaments were recorded by Wide-Field, Wide-Field + deconvolution, Sparse 2 $\times$ , and 2D-SIM (*c.f.*, **Extended Data Fig. 5e**). Using 2D-SIM as the ground truth, Wide-Field with Sparse 2 $\times$  reveals fine structure such as two-branched actin filaments separated correctly.

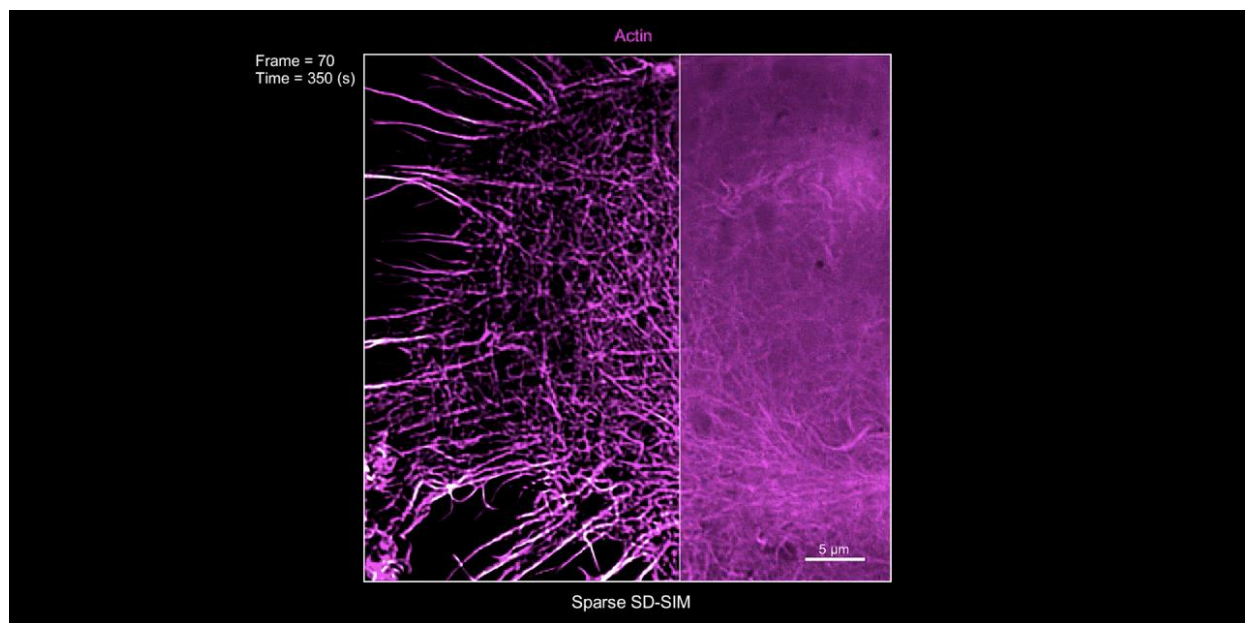

**Supplementary Video 16 | Relative dynamics of both actin filaments and CCPs captured by the dual-color Sparse SD-SIM.** Actin filaments (labeled by LifeAct-EGFP) and CCPs (labeled by Clathrin-DsRed) in COS-7 cells for 200 time points at a 5 s interval (*c.f.*, **Extended Data Fig. 15**). A CCP stably docked at the intersection of two actin filaments that begins to disappear from the confocal plane as the neighboring filaments close up and meet (marked with a yellow circle).

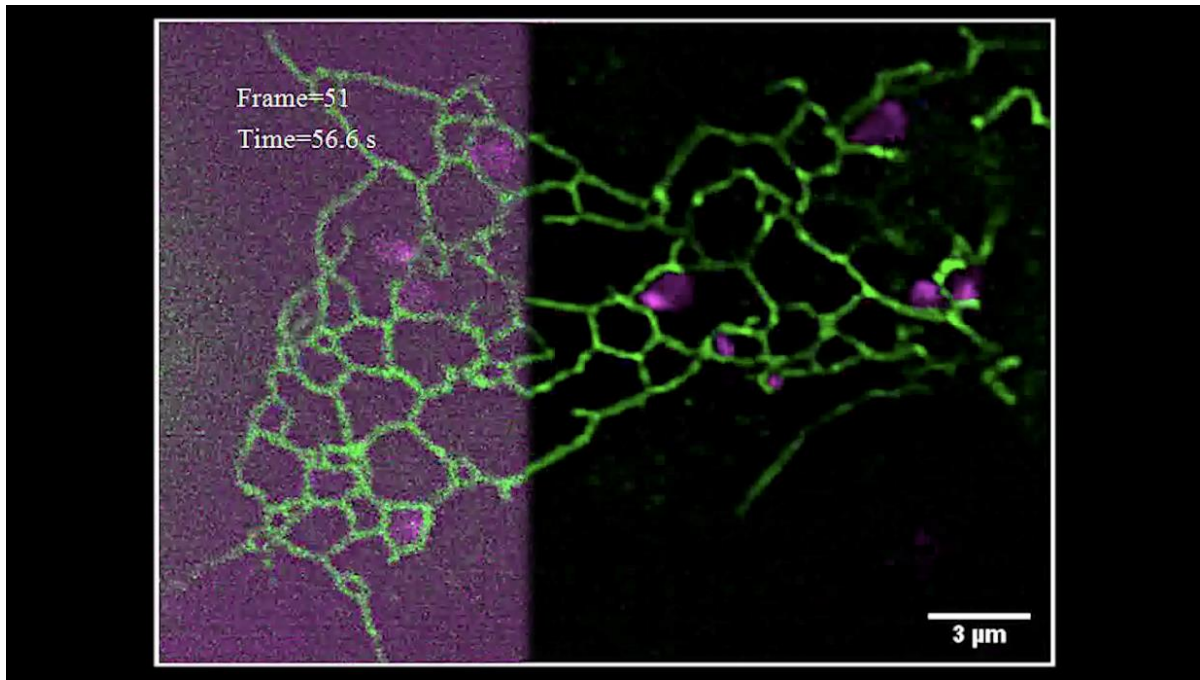

**Supplementary Video 17 | ER-lysosome contacts in live cells captured by the dual-color Sparse SD-SIM.**

Part I: The time-lapse full-field ER-lysosome (labeled with Sec61 $\beta$ -EGFP and LysoTracker Deep Red) view comparison of SD-SIM and Sparse SD-SIM (*c.f.*, **Extended Data Fig. 16**). Part II: The zoom-in example shows typical lysosome-ER contact dynamics by SD-SIM and Sparse SD-SIM. The lysosome-ER contact dynamics can be clearly viewed under Sparse SD-SIM.

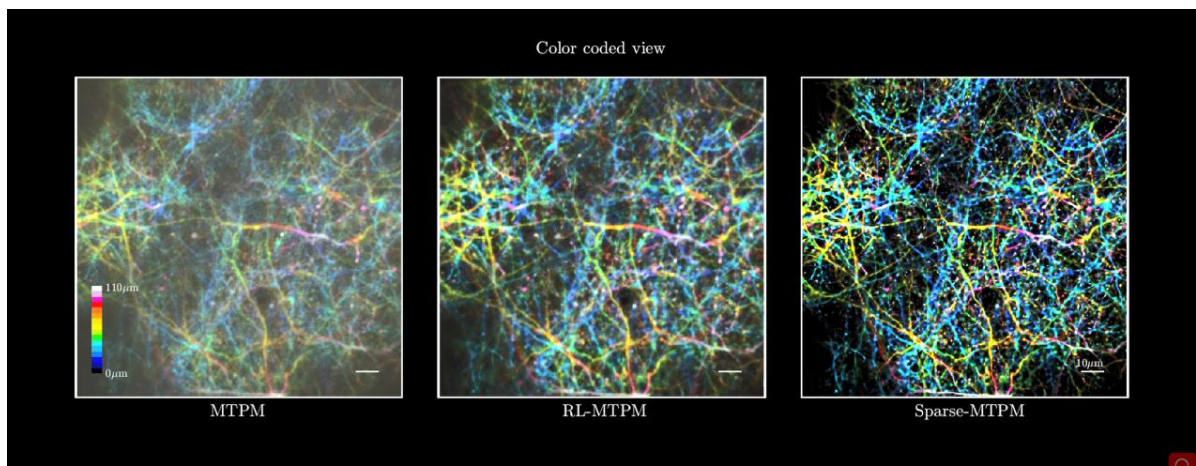

**Supplementary Video 18 | Three-dimensional images of neuronal dendrites and spines observed by the Sparse-MTPM.** Three-dimensional distributions of neuronal dendrites and spines within a volume of  $190 \times 190 \times 110 \mu\text{m}^3$  from the brain of a Thy1-GFP transgenic mouse observed with MTPM, RL deconvoluted MTPM (RL-MTPM), and Sparse-MTPM (*c.f.*, **Extended Data Fig. 20**). Part I demonstrates  $x$ - $y$  comparison of these three methods. Part II shows the  $x$ - $y$  orthoslices gradually forming color-coded volumes of MTPM, RL deconvoluted MTPM (RL-MTPM), and Sparse-MTPM from left to right respectively. Part III displays 3D volume rendered views of neuronal dendrites and spines from various angles.

- 954 1. Hunt, B.R. Super-resolution of images: Algorithms, principles, performance. *International Journal of Imaging*  
955 *Systems and Technology* **6**, 297-304 (1995).
- 956 2. Richardson, W.H. Bayesian-based iterative method of image restoration. *Journal of The Optical Society of America*  
957 *A* **62**, 55-59 (1972).
- 958 3. Lucy, L.B. An iterative technique for the rectification of observed distributions. *The Astronomical Journal* **79**, 745  
959 (1974).
- 960 4. Shepp, L.A. & Vardi, Y. Maximum likelihood reconstruction for emission tomography. *IEEE Transactions on*  
961 *Medical Imaging* **1**, 113-122 (1982).
- 962 5. Dey, N. et al. Richardson–Lucy algorithm with total variation regularization for 3D confocal microscope  
963 deconvolution. *Microscopy research and technique* **69**, 260-266 (2006).
- 964 6. Lucy, L.B. Resolution limits for deconvolved images. *The Astronomical Journal* **104**, 1260-1265 (1992).
- 965 7. Lucy, L.B. Statistical limits to super resolution. *Astronomy & Astrophysics* **261**, 706-710 (1992).
- 966 8. Wolter, H. On basic analogies and principal differences between optical and electronic information, Vol. 1. (Elsevier,  
967 1961).
- 968 9. Goodman & W, J. Introduction to Fourier optics. (Roberts and Company Publishers, 2005).
- 969 10. Bertero, M. & De Mol, C. Super-Resolution by Data Inversion, Vol. 36. (Elsevier, 1996).
- 970 11. Lindberg, J. Mathematical concepts of optical superresolution. *Journal of Optics* **14**, 083001 (2012).
- 971 12. Cox, c.I. & Sheppard, C. Information capacity and resolution in an optical system. *Journal of The Optical Society of*  
972 *America A* **3**, 1152-1158 (1986).
- 973 13. Aspelmeier, T., Egner, A. & Munk, A. Modern Statistical Challenges in High-Resolution Fluorescence Microscopy.  
974 *Annual Review of Statistics and Its Application* **2**, 163–202 (2015).
- 975 14. Robbins, M. & Hadwen, B.J. The noise performance of electron multiplying charge-coupled devices. *IEEE*  
976 *Transactions on Electron Devices* **50**, 1227-1232 (2003).
- 977 15. Foi, A., Trimeche, M., Katkovnik, V. & Egiazarian, K. Practical Poissonian-Gaussian Noise Modeling and Fitting for  
978 Single-Image Raw-Data. *IEEE Transactions on Image Processing* **17**, 1737-1754 (2008).
- 979 16. Mortensen, K.I., Churchman, L.S., Spudich, J. & Flyvbjerg, H. Optimized localization-analysis for single-molecule  
980 tracking and super-resolution microscopy. *Nature Methods* **7**, 377 - 381 (2010).
- 981 17. Hirsch, M., Wareham, R.J., Martin-Fernandez, M., Hobson, M.P. & Rolfe, D. A Stochastic Model for Electron  
982 Multiplication Charge-Coupled Devices: From Theory to Practice. *PLoS ONE* **8** (2013).
- 983 18. Liu, S. et al. sCMOS noise-correction algorithm for microscopy images. *Nature Methods* **14**, 760-761 (2017).
- 984 19. Born, M. & Wolf, E. Principles of optics, Edn. 7th. (Cambridge University Press, Cambridge; 1999).
- 985 20. Heintzmann, R. & Sheppard, C. The sampling limit in fluorescence microscopy. *Micron* **38 2**, 145-149 (2007).
- 986 21. Lohmann, A. et al. Space bandwidth product of optical signals and systems. *Journal of The Optical Society of America*  
987 *A* **13**, 470-473 (1996).
- 988 22. Betzig, E. et al. Imaging Intracellular Fluorescent Proteins at Nanometer Resolution. *Science* **313**, 1642 - 1645 (2006).
- 989 23. Rust, M., Bates, M. & Zhuang, X. Sub-diffraction-limit imaging by stochastic optical reconstruction microscopy  
990 (STORM). *Nature Methods* **3**, 793-796 (2006).
- 991 24. Huang, X. et al. Fast, long-term, super-resolution imaging with Hessian structured illumination microscopy. *Nature*  
992 *biotechnology* **36**, 451-459 (2018).
- 993 25. Candes, E.J. & Tao, T. Near-optimal signal recovery from random projections: Universal encoding strategies? *IEEE*  
994 *Transactions on Information Theory* **52**, 5406-5425 (2006).
- 995 26. Szameit, A. et al. Sparsity-based single-shot subwavelength coherent diffractive imaging. *Nature materials* **11**, 455-  
996 459 (2012).
- 997 27. Zhu, L., Zhang, W., Elnatan, D. & Huang, B. Faster STORM using compressed sensing. *Nature Methods* **9**, 721-723



- (2012).
28. Galloway, C., Le Ru, E. & Etchegoin, P. An iterative algorithm for background removal in spectroscopy by wavelet transforms. *Applied Spectroscopy* **63**, 1370-1376 (2009).
  29. Lloyd, S.P. Least squares quantization in PCM. *IEEE Trans. Inf. Theory* **28**, 129-136 (1982).
  30. Wang, Y., Yang, J., Yin, W. & Zhang, Y. A new alternating minimization algorithm for total variation image reconstruction. *SIAM Journal on Imaging Sciences* **1**, 248-272 (2008).
  31. Goldstein, T. & Osher, S. The split Bregman method for L1-regularized problems. *SIAM journal on imaging sciences* **2**, 323-343 (2009).
  32. Landweber, L. An iteration formula for Fredholm integral equations of the first kind. *American journal of mathematics* **73**, 615-624 (1951).
  33. Sutskever, I., Martens, J., Dahl, G. & Hinton, G. in International conference on machine learning 1139-1147 (2013).
  34. Veklerov, E. & Llacer, J. Stopping rule for the MLE algorithm based on statistical hypothesis testing. *IEEE Transactions on Medical Imaging* **6**, 313-319 (1987).
  35. Biggs, D.S. & Andrews, M. Acceleration of iterative image restoration algorithms. *Applied optics* **36**, 1766-1775 (1997).
  36. Stein, S.C., Huss, A., Hähnel, D., Gregor, I. & Enderlein, J. Fourier interpolation stochastic optical fluctuation imaging. *Optics Express* **23**, 16154-16163 (2015).
  37. Peng, T. et al. A BaSiC tool for background and shading correction of optical microscopy images. *Nature Communications* **8**, 14836 (2017).
  38. Theer, P., Mongis, C. & Knop, M. PSFj: know your fluorescence microscope. *Nature Methods* **11**, 981-982 (2014).
  39. Beck, A. & Teboulle, M. A Fast Iterative Shrinkage-Thresholding Algorithm for Linear Inverse Problems. *SIAM J. Imaging Sciences* **2**, 183-202 (2009).
  40. Gazit, S., Szameit, A., Eldar, Y.C. & Segev, M. Super-resolution and reconstruction of sparse sub-wavelength images. *Optics Express* **17**, 23920-23946 (2009).
  41. Luisier, F., Vonesch, C., Blu, T. & Unser, M. Fast interscale wavelet denoising of Poisson-corrupted images. *Signal Processing* **90**, 415-427 (2010).
